1 **Long title:** A revised understanding of *Tribolium* morphogenesis further  
2 reconciles short and long germ development

3

4 **Short title:** A significant revision to our understanding of short germ  
5 embryogenesis

6

7

8 **Author:** Matthew A. Benton

9

10 **Author affiliation:** Department of Zoology, University of Cologne, Cologne, NRW, Germany

11

12 **Corresponding author:** Matthew A. Benton, [matthewabenton@gmail.com](mailto:matthewabenton@gmail.com)

13

## 14 **Abstract**

15 In *Drosophila melanogaster*, the germband forms directly on the egg surface and solely  
16 consists of embryonic tissue (termed long germ development). In contrast, most insect  
17 embryos undergo a complicated set of tissue rearrangements to generate a condensed, bi-  
18 layered germband (termed short/intermediate germ development). The ventral side of the  
19 germband is embryonic, while the dorsal side is thought to be an extraembryonic tissue  
20 called the amnion. While this tissue organisation has been accepted for decades, and has  
21 been widely reported in insects, its accuracy has not been directly tested in any species.  
22 Using live cell tracking and differential cell labelling in the short germ beetle *Tribolium*  
23 *castaneum*, I show that most of the cells previously thought to be amnion actually give rise  
24 to large parts of the embryo. This process occurs via the dorsal-to-ventral flow of cells and  
25 contributes to germband extension. In addition, I show that true ‘amnion’ cells in *Tribolium*  
26 originate from a small region of the blastoderm. Together, my findings show that  
27 development in the short germ embryos of *Tribolium* and the long germ embryos of  
28 *Drosophila* is more similar than previously proposed. Dorsal-to-ventral cell flow also occurs  
29 in *Drosophila* during germband extension, and I argue that the flow is driven by a conserved  
30 set of underlying morphogenetic events in both species. Furthermore, the revised *Tribolium*  
31 fatemap that I present is far more similar to that of *Drosophila* than the classic *Tribolium*  
32 fatemap. Lastly, my findings show that there is no qualitative difference between the  
33 structures of the blastoderm and the short/intermediate germ germband. As such, the same  
34 tissue patterning mechanisms could function continuously throughout the cellularised  
35 blastoderm and germband stages, and easily shift between them over evolutionary time.

36

37

38

## 39 **Introduction**

40 Insects are the most speciose phylum of animals and display remarkable diversity in adult  
41 morphology [1]. Insect embryo development is also very diverse, particularly in the stages  
42 leading to the formation of the elongated, segmented embryo (called the germband) [2].  
43 The molecular and morphogenetic basis of this process is best understood in the fly  
44 *Drosophila melanogaster*. In this species, a predominantly hierarchical chain of patterning  
45 events specifies nearly all segments more-or-less simultaneously at the syncytial blastoderm  
46 stage [3]. Cellularisation takes place near the end of this process, after which point  
47 morphogenetic events such as germband extension (GBE) occur (see Fig 1 for schematic  
48 summary). The *Drosophila* mode of development is termed long germ development and is  
49 fairly representative of most true flies [4]. In contrast, the vast majority of insects undergo  
50 short or intermediate germ development, meaning that only a handful of segments are  
51 specified at the blastoderm stage and the remaining segments are specified sequentially as  
52 the germband elongates [5].

53         Short germ development has been best studied in the beetle *Tribolium castaneum*,  
54 and recent research has shown that development in this species is more similar to  
55 *Drosophila* than previously thought. In *Drosophila*, GBE is predominantly driven by the  
56 mediolateral intercalation of ectodermal cells (i.e. convergent extension), although cell  
57 deformation along the anterior-posterior (AP) axis and cell divisions are also involved [6–11].  
58 In contrast to this, *Tribolium* germband elongation was previously thought to be driven by  
59 the so-called ‘growth zone’ at the posterior of the germband [12]. Now, however, it is clear  
60 that *Tribolium* germband elongation is also predominantly driven by mediolateral cell  
61 intercalation (see Fig 1 for schematic summary of *Tribolium* development) [13–15].

62 Furthermore, in both *Tribolium* and *Drosophila*, this intercalation requires the striped  
 63 expression of a specific group of Toll genes (so-called Long Toll/Loto class genes) [16,17].

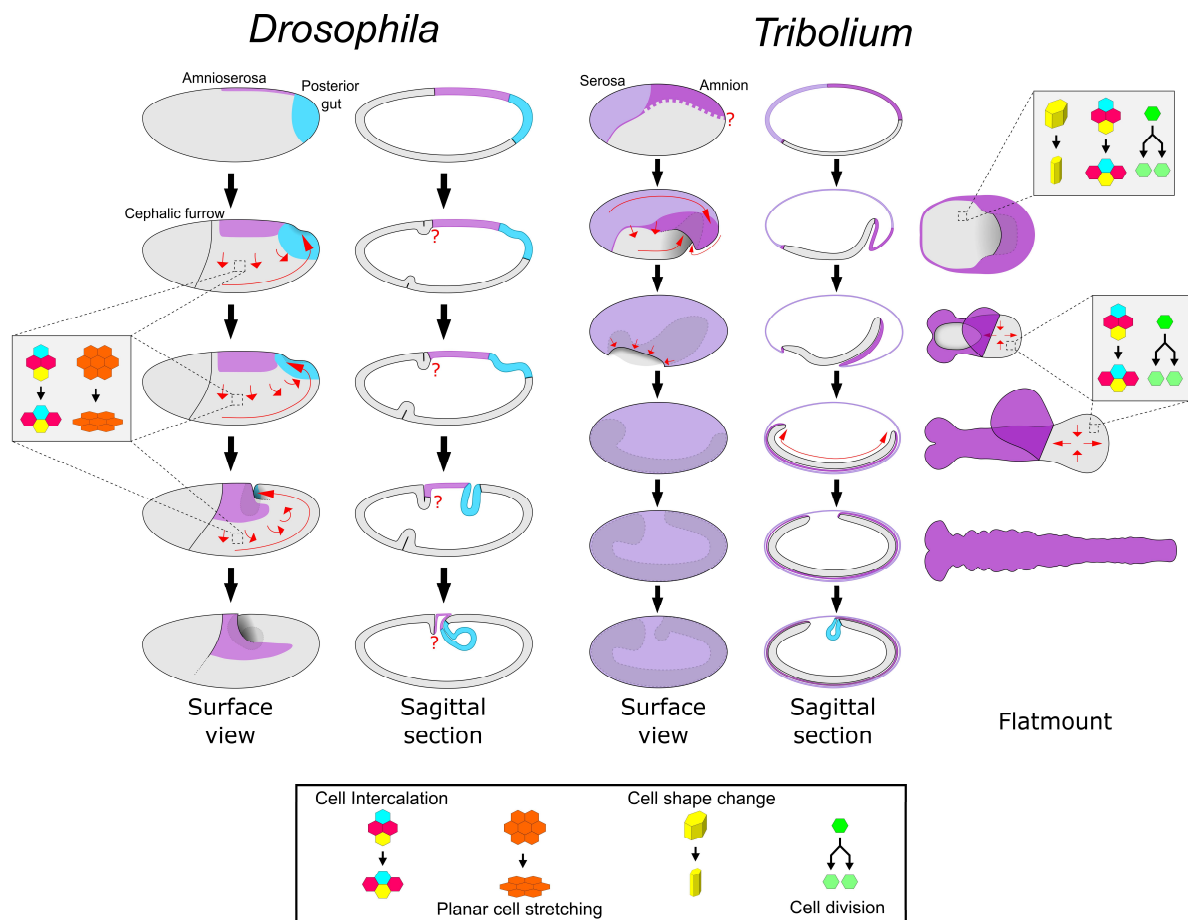

64  
 65 **Fig 1. Schematics of development in *Drosophila* and *Tribolium*.** The two left columns show  
 66 schematics of *Drosophila* embryos from the uniform blastoderm stage to the extended  
 67 germband stage. The right three columns show schematics of *Tribolium* embryos at  
 68 comparable developmental stages. The schematics in the right-most column depict  
 69 dissected, flatmounted embryos. Red arrows display cell/tissue movement. The question  
 70 marks highlight two regions (the *Drosophila* embryo/amnioserosa border in the cephalic  
 71 furrow region, and the DV position of the *Tribolium* embryo/amnion border) where the  
 72 tissue boundaries are unknown/undescribed. Several features have been omitted, including  
 73 the yolk, mesoderm gastrulation, anterior gut formation and appendage formation. The

74 *Drosophila* fatemap is based on data from [18] and the references therein. Refer to text for  
75 additional details.

76

77 It is highly likely that germband elongation mediated by cell intercalation is  
78 homologous in these two species, and probably in other arthropods, as well [17]. As such, I  
79 will hereafter refer to *Tribolium* ‘germband elongation’ as ‘germband extension’/GBE,  
80 unifying the *Drosophila/Tribolium* terminology. In addition, as there is no evidence for a  
81 qualitatively different ‘growth zone’ in *Tribolium* (i.e. a specialised zone of volumetric  
82 growth), I will refer to the posterior unsegmented region as the ‘segment addition zone’  
83 (SAZ) [19–21].

84 Despite the similarities described above, there are substantial differences in the  
85 embryonic fatemaps of these two species (Fig 1). In *Drosophila*, almost the entire  
86 blastoderm is fated as embryonic tissue, and only a small dorsal region is fated as  
87 extraembryonic tissue (termed the amnioserosa) [18]. In contrast, in *Tribolium*, roughly the  
88 anterior third of the blastoderm gives rise to an extraembryonic tissue called the serosa [22].  
89 Of the remaining blastoderm, a large dorsal region is thought to give rise to a second  
90 extraembryonic tissue called the amnion, with only the remaining ventral tissue giving rise to  
91 the embryo itself [23–25]. Like the amnioserosa, the serosa and the amnion are proposed to  
92 support the embryo during development, but are thought to degenerate prior to hatching  
93 and not contribute to any larval or adult structures [19,26,27].

94 *Drosophila* and *Tribolium* also exhibit dramatic differences in the morphogenetic  
95 events occurring during early development (Fig 1). When GBE occurs in *Drosophila*, the  
96 germband stays at the surface of the egg and the amnioserosa largely remains in place. In  
97 *Tribolium*, on the other hand, germband extension begins with a process called embryo

98 condensation, during which the embryonic ectoderm and presumptive amnion (together  
99 termed the ‘germ rudiment’) form the germband (see Fig 1; for a detailed description see  
100 [14,28]). Several concurrent morphogenetic events underlie embryo condensation. The  
101 embryonic ectoderm condenses towards the ventral side of the egg via both mediolateral  
102 cell intercalation and a cuboidal-to-columnar cell shape transition. Simultaneously, epithelial  
103 folding and tissue involution occurs, causing the presumptive amnion to fold over the  
104 embryonic ectoderm. During these movements, the serosa cells undergo a cuboidal-to-  
105 squamous transition to spread over the entire egg surface. The final stage of embryo  
106 condensation coincides with closure of the serosa (serosa window stage).

107         The differences in fatemap and tissue folding described above show that both  
108 fatemap shifts and reductions in early morphogenetic events have contributed to the  
109 evolution of the long germ mode of development found in *Drosophila*. However, it is  
110 important to note that *Drosophila*, regarding the extraembryonic tissues, represents an  
111 extreme case of reductive evolution, which is characteristic only for higher cyclorrhaphan flies  
112 [29]. More basally branching flies form both an amnion and a serosa, while still exhibiting  
113 the long germ mode of development (for a review see [26]). For example, in the scuttle fly  
114 *Megaselia abdita*, both an amnion and serosa form, but while the serosa spreads over the  
115 egg surface as in *Tribolium*, the amnion remains at the dorsal side of the embryo, similar to  
116 the *Drosophila* amnioserosa [30–33]. Such intermediate topologies help to explain the  
117 evolution of the situation in *Drosophila*, where all extraembryonic cells remain at the dorsal  
118 side.

119         Understanding how these differences evolved is integral to understanding the short-  
120 to-long germ transition, but in order to study how this occurred, we first need to understand  
121 how these tissues develop in each species. The form and function of the *Tribolium* serosa has

122 been analysed in several studies [22,34,35]. The amnion, on the other hand, has proven  
123 harder to analyse, and the precise embryo/amnion boundary at the blastoderm stage is  
124 unknown. However, a defined boundary between embryo and amnion has been proposed to  
125 exist at the germband stage (Fig 1) [23]. Cells in the ventral half of the germband (ventral  
126 with respect to the germband DV polarity, but dorsal with respect to the egg) are thought to  
127 give rise to all embryonic structures, while cells in the dorsal half of the germband (dorsal  
128 with respect to the germband DV polarity, but ventral with respect to the egg) are thought  
129 to form the amnion [25,36,37]. This germband structure has been described in many insects  
130 over the past century and is proposed to represent the core conserved structure of  
131 short/intermediate germ embryos (reviewed in [2,38,39]). However, the proposed boundary  
132 between cells fated to become embryo and those fated to become amnion has not been  
133 directly tested.

134         Here, I investigate the development of the presumptive amnion in *Tribolium* using a  
135 combination of fluorescent live imaging and fate mapping techniques. To my great surprise, I  
136 find that the majority of the cells previously described as ‘amnion’ actually form large parts  
137 of the embryo proper. Using fate-mapping experiments, I show that true ‘amnion’ cells  
138 originate from a very small domain of the blastoderm, just as the *Drosophila* *amnioserosa*  
139 cells do. I also show that the movement of cells from the ‘amnion’ side of the germband to  
140 the ‘embryo’ side of the germband occurs via the large scale flow of the ectodermal  
141 epithelium. Lastly, I describe the underlying causes of this flow, and show how this tissue  
142 movement is likely homologous to the dorsal-to-ventral tissue flow that occurs during  
143 *Drosophila* GBE.

144         This discovery forces a major shift in our view of development in *Tribolium* (and of  
145 short/intermediate germ insects in general) and demonstrates that there is no qualitative

146 difference in germband tissue structure between *Tribolium* and *Drosophila*. Furthermore,  
147 this discovery has significant consequences for the study of short/intermediate germ  
148 development going forward, as currently the tissue thought to be “amnion” (but is actually a  
149 large region of the embryo) is routinely discarded or ignored during sample preparation.

150

## 151 **Results**

### 152 **Live cell tracking reveals movement of ‘amnion’ cells into the embryo**

153 To examine the development of the *Tribolium* presumptive amnion in detail, I carried out  
154 high resolution live imaging of embryos transiently labelled [14] with a fluorescent histone  
155 marker (H2B-venus) to label nuclei. My goal was to track presumptive amnion cells from the  
156 blastoderm stage onwards. However, it was not possible to accurately track the majority of  
157 cells throughout embryo condensation and GBE, due to the extensive morphogenetic  
158 rearrangements that take place during this process. Instead, I focused on the stage  
159 immediately following condensation when the germband has formed, and analysed the  
160 embryonic region where the presumptive amnion is closest to the surface of the egg.  
161 Specifically, I tracked over 200 presumptive amnion cells from the central region of the  
162 embryo from the closure of the serosa window until after the formation of the thoracic  
163 segments (over 11 hours of development; Fig 2 and S2 Movie). As previously described [14],  
164 the germband and yolk exhibit pulsatile movements during this period, as well as rotating  
165 within the serosa (S1 Movie).

166 The presumptive amnion initially consists of many tightly packed cells, which become  
167 increasingly spread out during GBE (S2 Movie, Fig 2(A-C)). However, rather than remaining  
168 restricted to the ‘amnion territory’, many of the tracked cells moved around the edge of the  
169 germband into the ‘embryo territory’. Differential labelling of tracked cells clearly showed



170 that these cells that moved around the germband edge became part of the embryo proper  
171 (S2 Movie and Fig 2(A-C)). The cells that joined the ‘embryo territory’ became tightly packed,  
172 continued to divide, and formed embryonic structures (S3 Movie and Fig 2(D-F)). In contrast,  
173 cells that remained in the ‘amnion territory’ became squamous and stopped dividing. The  
174 nuclei of these latter cells became enlarged (S3 Movie and Fig 2(D-F)), suggesting that they  
175 underwent endoreplication to become polyploid, as seen in the *Tribolium* serosa and in the  
176 *Drosophila* amnioserosa [18,24]. In addition, several germband nuclei underwent apoptosis  
177 (S3 Movie) as has been described in fixed embryos [40]. These results show that many of the  
178 cells previously thought to constitute extraembryonic amnion give rise to embryonic  
179 structures.

180           Since the epithelium formerly termed ‘amnion’ is made up cells that will variously  
181 form amnion, dorsal ectoderm and dorsolateral ectoderm, it is not accurate for the entire  
182 tissue to be called ‘amnion’. Therefore, I will refer to this part of the germband as the ‘dorsal  
183 epithelium’, based on the tissue’s location at the dorsal side of the germband (with respect  
184 to the DV polarity of the germband rather than the egg). This term ‘dorsal epithelium’ is  
185 simply a spatial designation, and comes with no implicit assumptions about the identity of  
186 the tissue nor the final fate of the tissue. It is also important to keep in mind that the dorsal  
187 epithelium is continuous with the ventral epithelium.

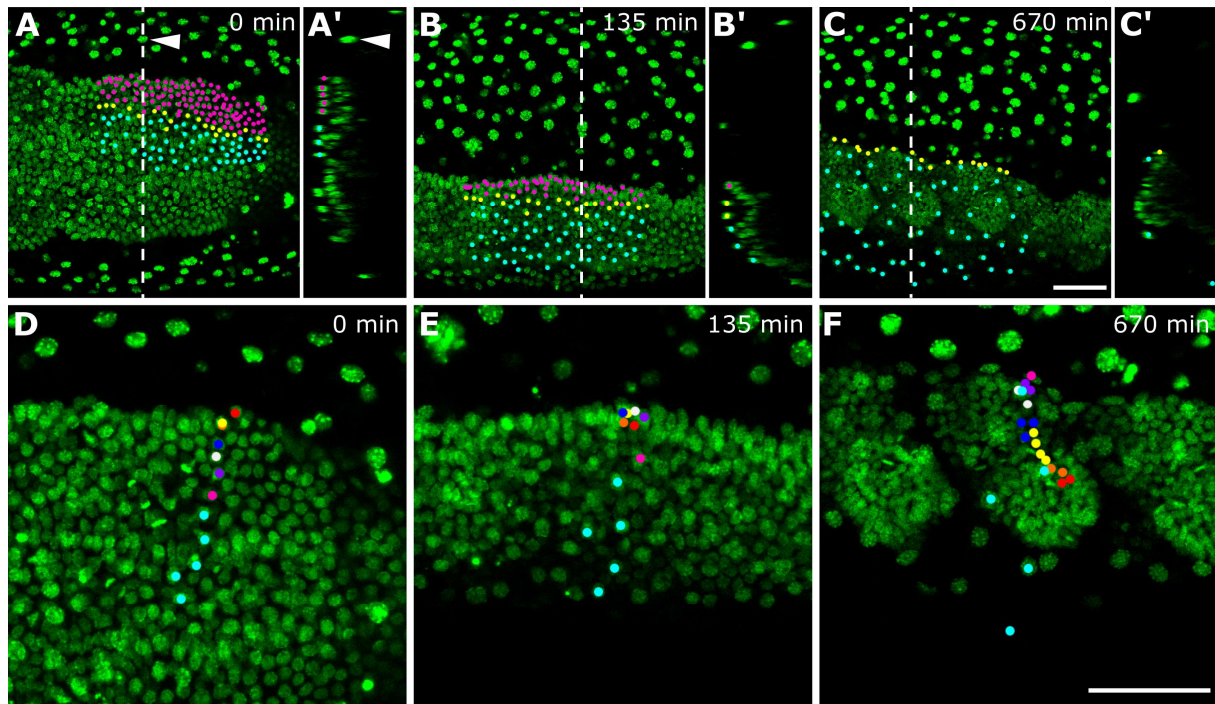

188

189 **Fig 2. Live cell tracking reveals contribution of 'amnion' cells to embryonic tissue. (A-F)**

190 Time series from fluorescent live imaging of a *Tribolium* embryo expressing H2B-venus. The  
191 serosa nuclei located above the germband have been manually removed from these frames,  
192 but left in the surrounding territory (arrowhead in (A+A')). (A'-C') show optical transverse  
193 sections of the respective frame at the position shown by the dashed line (the surface of the  
194 egg is to the left). In (A-C), all nuclei that lie in a region of the 'amnion territory' in (A) have  
195 been tracked and differentially labelled depending on whether they become part of the  
196 embryo (magenta; labels disappear when nuclei join the germband), become located at the  
197 edge of the germband (yellow) or remain in the 'amnion territory' (cyan). In (D-F), a line of  
198 nuclei that lie in the 'amnion territory' in (D) have been tracked and differentially labelled  
199 depending on whether they become part of the embryo (coloured points; daughter cells are  
200 labelled in same colour as parent) or remain in the 'amnion territory' (cyan; no division takes  
201 place). Note that in panel (D), the orange spot is mostly hidden below the yellow spot  
202 because the nuclei in that region are partially overlapping when viewed as projections. The  
203 first frame of the timelapse was defined as timepoint 0. In (A-F), embryos are oriented based

204 on the AP/DV polarity of the egg with anterior to the left and dorsal to the top. (A-C) are  
205 maximum intensity projections of one egg hemisphere. (D-F) are average intensity  
206 projections of 46 microns to specifically show the germband. Scale bars are 50  $\mu\text{m}$ .

207

## 208 **Differential cell labelling confirms widespread dorsal-to-ventral cell movement**

209 My next question was whether the movement of cells from the dorsal epithelium to the  
210 ventral epithelium occurs throughout the AP axis or is just limited to the thoracic region. The  
211 extensive movements of the germband made it difficult to track individual cells accurately at  
212 the anterior and posterior poles. To overcome this problem, I combined differential cell  
213 labelling with long term fluorescent live imaging to follow small groups of nuclei throughout  
214 development. Specifically, I microinjected mRNA encoding a nuclear-localised  
215 photoconvertible fluorescent protein (NLS-tdEos) into pre-blastoderm embryos to uniformly  
216 label all nuclei, then photoconverted a small patch of nuclei at different positions along the  
217 AP axis at the final uniform blastoderm stage. I then performed long term confocal live  
218 imaging of both the unconverted and photoconverted forms of the fluorescent protein  
219 throughout the period of GBE (or longer). Unlike that of *Drosophila*, the *Tribolium* egg shell  
220 does not show any dorsoventral (DV) polarity, and I was therefore unable to specifically  
221 target particular locations along the DV axis. Instead, I opted for a brute-force approach and  
222 performed the photoconversion experiment for 50-150 embryos at each AP position (75%  
223 egg length [EL] from the posterior pole, 50% EL, 25% EL, and close to the posterior pole), and  
224 then used the resulting live imaging data to determine the DV position of the  
225 photoconverted cells. Using a new live imaging set up (see Materials and Methods), I  
226 obtained the same range of hatching rates as I typically obtain for other microinjection  
227 experiments (approximately 80%, [14]), even after continuous confocal live imaging for

228 almost the entirety of *Tribolium* embryonic development (3.5 days; S4 Movie). Both  
229 unconverted and photoconverted protein persisted throughout germband extension and  
230 retraction, although fluorescent signal faded over time. I have included various examples  
231 from this data set in S1-S3 Figures. In addition, I have made the raw confocal data for a large  
232 number of timelapses available online (>300 embryos, >700 GB of data [41]) for the benefit  
233 of the community. This data will likely prove valuable for a wide range of research projects.

234         When I examined clones initially located in the dorsal epithelium, I found that  
235 movement of cells from the dorsal epithelium to the ventral epithelium occurred throughout  
236 the posterior of the embryo during GBE (Fig 3(A-F), S5 Movie). I also observed the same  
237 movements at the anterior of the germband (Fig 3(G-J)), although I have focused my analysis  
238 on the middle and posterior parts of the embryo. Together with the cell tracking data, these  
239 results show that most of what was previously thought to be ‘amnion’ is in fact embryonic  
240 tissue, and that cells move from the dorsal epithelium to the ventral epithelium throughout  
241 the germband (summarised in Fig 3(K,L)).

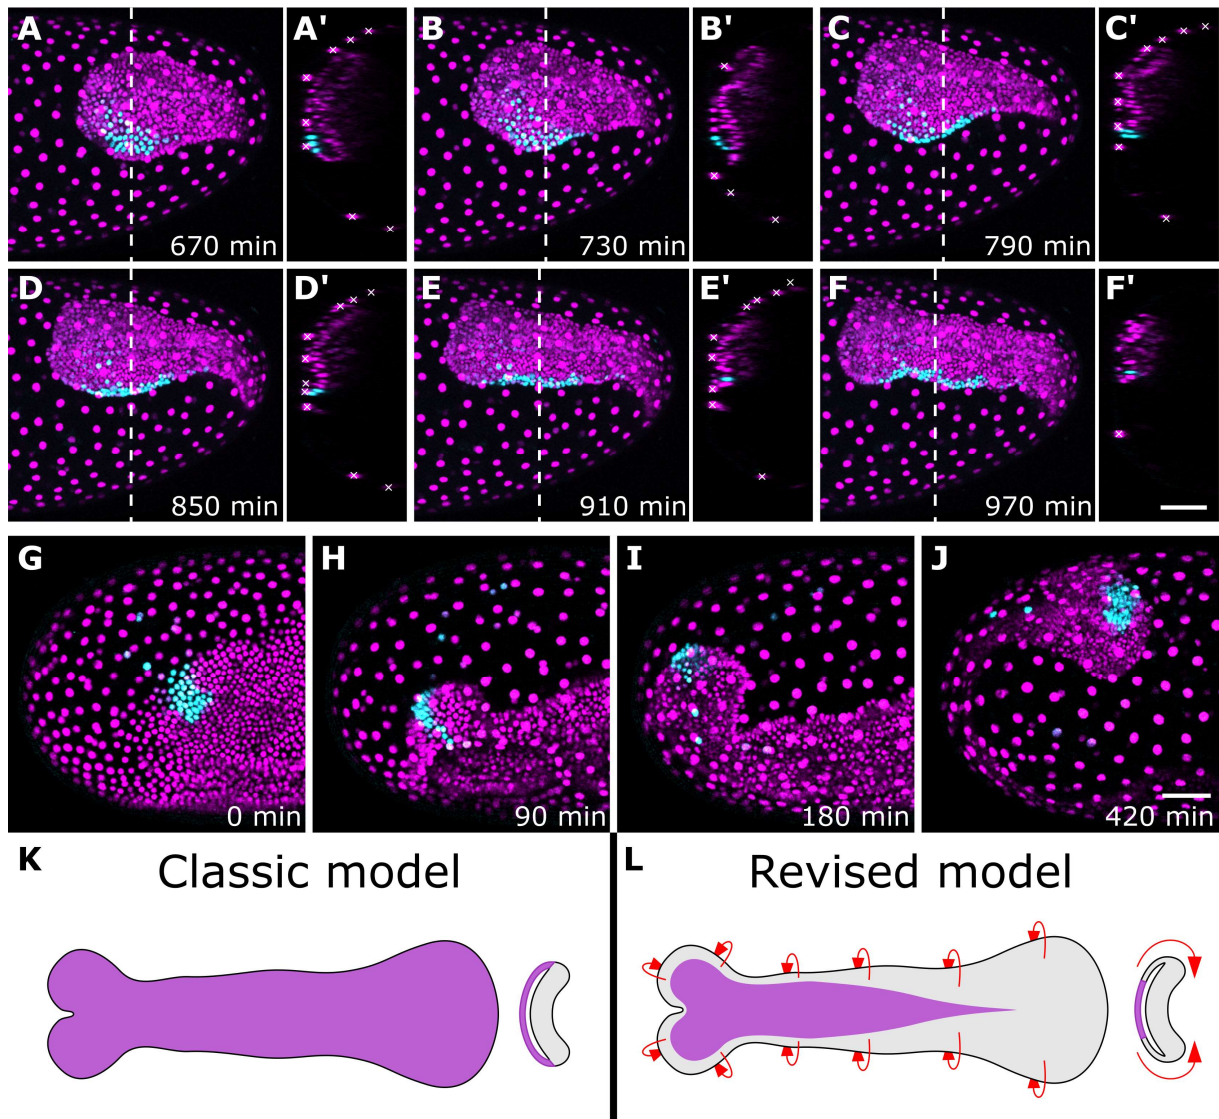

242

243 **Fig 3. Differential cell labelling reveals widespread movement of cells from the dorsal**  
 244 **epithelium to the ventral epithelium.** (A-J) Time series from fluorescent live imaging of two  
 245 *Tribolium* embryos expressing NLS-tdEos showing unconverted protein (magenta) and  
 246 photoconverted protein (cyan). In (A-F') a patch of nuclei at the posterior-dorsal region of  
 247 the blastoderm were photoconverted. Panels (A-F) show the posterior region of the  
 248 germband during late GBE and panels (A'-F') show optical transverse sections made at the  
 249 position of the dashed line at each timepoint (roughly following the same nuclei). Serosa  
 250 nuclei are marked by white crosses in the transverse sections. In (G-J), a patch of nuclei at  
 251 the anterior-lateral region of the blastoderm were photoconverted. Panels (G-J) show the

252 anterior of the germband during condensation and GBE. In both embryos, all converted  
253 nuclei are initially located in the dorsal epithelium, but most move into the ventral  
254 epithelium during GBE. (K-L) Schematics showing the classic and revised models of the  
255 *Tribolium* germband (presumptive amnion is shown in purple, presumptive embryo is shown  
256 in grey, red arrows show the newly discovered tissue flow). The first frame of the timelapses  
257 was defined as timepoint 0. In (A-J), embryos are oriented based on the AP/DV polarity of  
258 the egg with anterior to the left and dorsal to the top. In (A'-F'), the surface of the egg is  
259 oriented to the left. In (K-L), schematics show flatmounted germbands with the focus on the  
260 dorsal epithelium, the anterior to the left and the orthogonal sections are oriented with the  
261 dorsal half of the germband to the left. (A-J) are maximum intensity projections of one egg  
262 hemisphere. Scale bars are 50  $\mu\text{m}$ .

263

#### 264 **Mediolateral cell intercalation occurs throughout GBE**

265 During my live imaging, ectodermal cell clones became elongated along the AP axis over  
266 time, as previously reported in a *Tribolium* study that used a non-live imaging cell clone  
267 method [15]. However, this study found that “labelled ectodermal cells ... rarely mix with  
268 unlabelled cells” even as clones became greatly elongated [15]. In contrast, I frequently  
269 observed non-converted nuclei in the midst of labelled nuclei (S1-S3 Fig and see below).

270 To test whether the pattern I observed was caused by mediolateral cell intercalation,  
271 I tracked the nuclei of abutting rows of ectodermal cells in the SAZ during formation of the  
272 abdominal segments (50 cells in total, tracked for 3.5 hours; Fig 4 and S6 Movie). This  
273 analysis clearly showed that, as during embryo condensation [14], cells intercalated between  
274 their dorsal and ventral neighbours. Together with the photoconversion dataset, these

- 275 results show that extensive mediolateral cell intercalation takes place throughout GBE to
- 276 drive the convergent extension of the ectoderm.

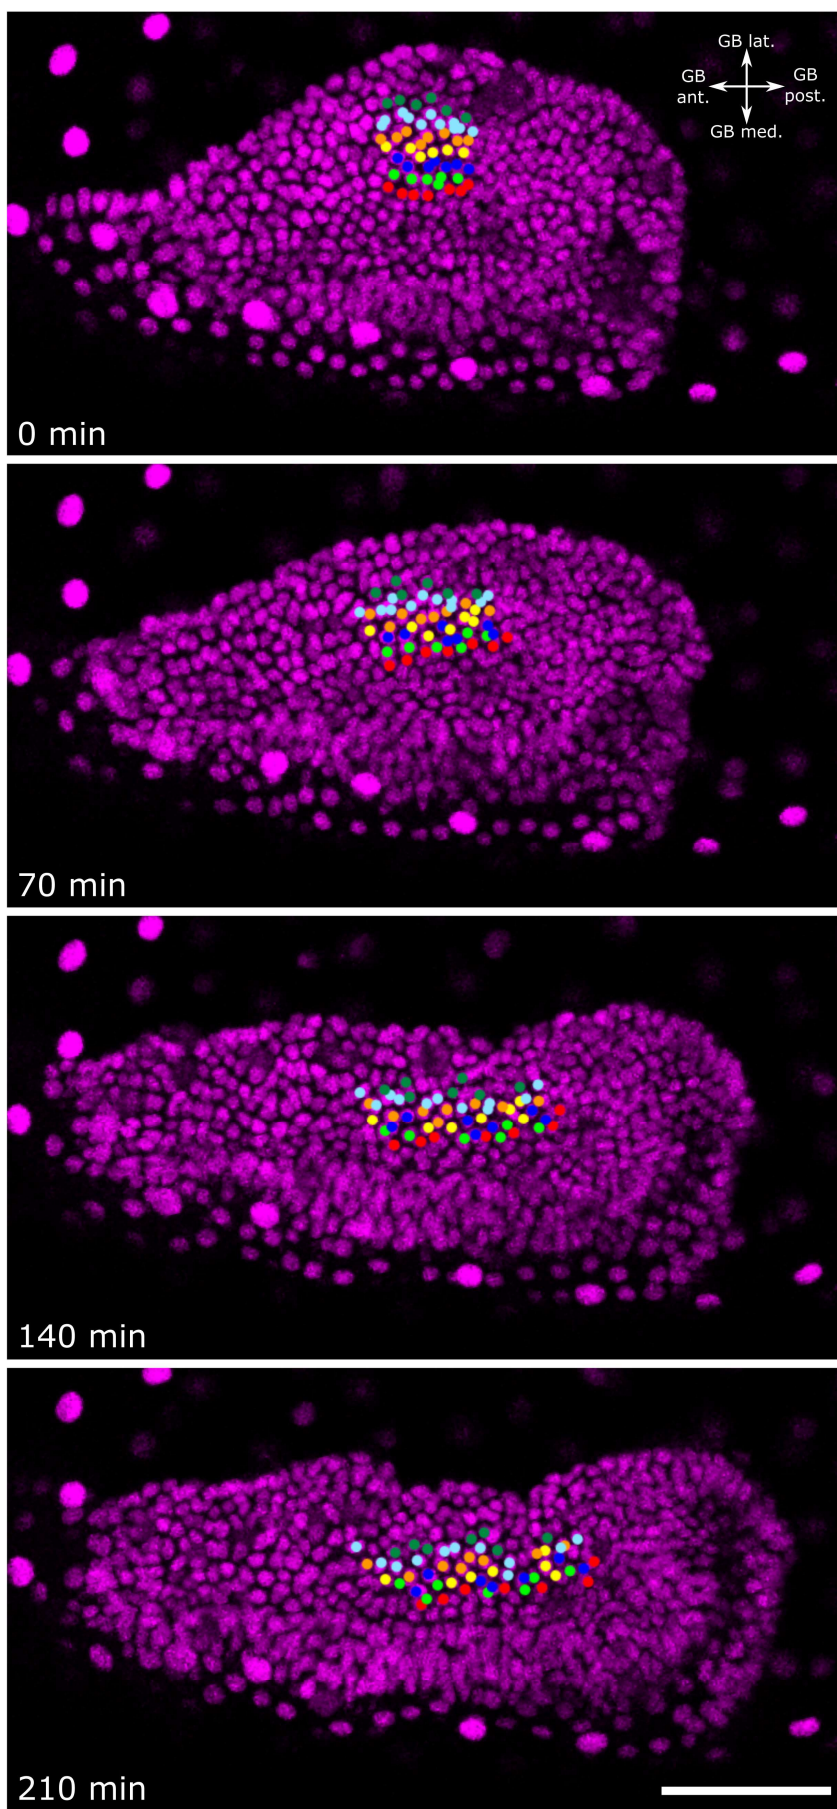



278 **Fig 4. Mediolateral cell intercalation occurs in the SAZ during GBE.** Time series from  
279 fluorescent live imaging of a *Tribolium* embryo expressing NLS-tdEos showing the SAZ during  
280 abdominal segment formation. Coloured points mark tracked nuclei. During the timelapse,  
281 nuclei underwent apicobasal movement but no cell delamination occurred. Note that the  
282 same embryo is shown in Fig 3(A-F). The first frame of the timelapse was defined as  
283 timepoint 0. The embryo is oriented based on polarity of the visible region of the germband.  
284 Panels show maximum intensity projections of 15  $\mu\text{m}$  to specifically show the germband.  
285 Abbreviations as follows: germband (GB); anterior (ant); posterior (post); medial (med);  
286 lateral (lat). The scale bar is 50  $\mu\text{m}$ .

287

#### 288 ***Tribolium serpent* may mark true ‘amnion’**

289 As described earlier, cells that remained in the dorsal epithelium became squamous, and this  
290 cell shape change occurred progressively along the AP axis (Fig 5(A)). This change in cell  
291 shape may be a sign of maturation of true ‘amnion’. While characterising cell fate markers, I  
292 found that the *Tribolium* ortholog of the GATA factor *serpent* (*Tc-srp*) exhibited spatial and  
293 temporal expression dynamics that were very similar to those of the potential ‘amnion’ (Fig  
294 5(B), S4 Fig).

295 At the end of GBE, all but the most posterior cells of the dorsal epithelium were  
296 squamous (data not shown) and *Tc-srp* seemed to be expressed in dorsal epithelium cells  
297 along nearly the full length of the germband (S4 Fig(I<sub>2</sub>)). However, this latter finding was  
298 difficult to confirm as most of the dorsal epithelium is lost during embryo fixation at this  
299 embryonic stage (presumably due to the fragility of the tissue). I also found *Tc-srp* to be  
300 expressed in several other domains, including in the presumptive endoderm (S4 Fig).

301           In *Drosophila*, *serpent* is also expressed in extraembryonic tissue (the amnioserosa)  
302 [42–45], and, therefore, *Tc-srp* may mark ‘true’ extraembryonic amnion. However, future  
303 work is required to confirm whether this putative amnion degenerates prior to hatching (as  
304 is required to be defined as extraembryonic). For simplicity, I will refer to this tissue as  
305 ‘amnion’ for the remainder of this text.

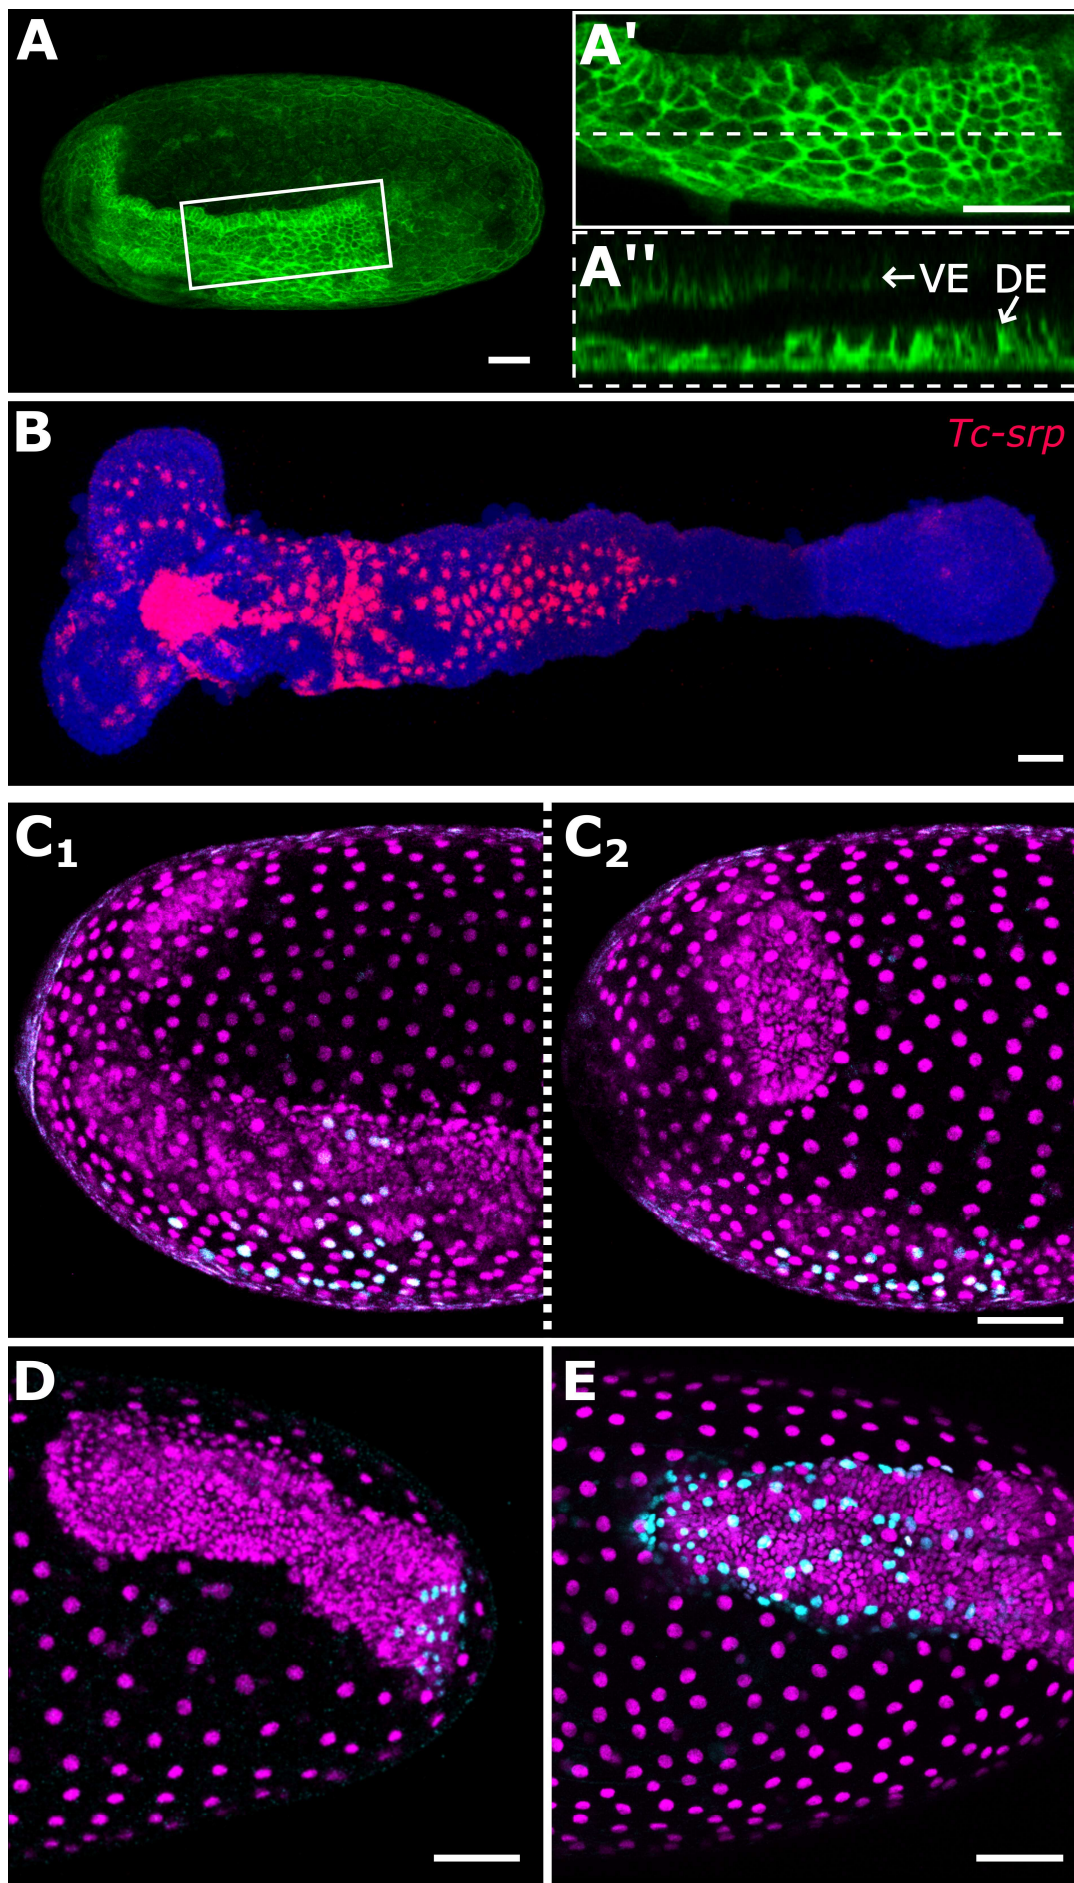

307 **Fig 5. Development of the putative amnion.** (A-A'') *Tribolium* embryo transiently expressing  
308 the membrane marker GAP43-YFP. (A) shows an overview of the whole egg, (A') shows the  
309 dorsal epithelium of the same embryo at the position of the white box, (A'') is an optical  
310 sagittal section at the position of the dashed line in (A') showing the apical-basal height of  
311 cells of the dorsal epithelium. (B) *Tc-srp* (red) expression in a flatmounted *Tribolium*  
312 germband also showing nuclei (DAPI, blue). The strong *Tc-srp* signal in nuclei may suggest  
313 nuclear or peri-nuclear localisation of the transcript, or it may be due to the cell body being  
314 flattened. Aside from the strong patch of anterior medial expression (which is from cells  
315 beneath the embryonic ectoderm), all visible expression is in the putative amnion  
316 epithelium. (C-E) Extended germband stage *Tribolium* embryos transiently expressing NLS-  
317 tdEos showing unconverted protein (magenta) and photoconverted protein (cyan). In each  
318 embryo, the clone of converted cells spans the entire amnion. (C<sub>1-2</sub>) show both sides of the  
319 same embryo in which a 6 nuclei wide patch of dorsal-most cells located at 50% EL were  
320 photoconverted at the blastoderm stage. (E) shows an embryo in which a 3 nuclei wide  
321 patch of dorsal-most cells located at 25% EL were photoconverted at the blastoderm stage.  
322 (F) shows an embryo in which a 3 nuclei wide by 6 nuclei long patch of dorsal-most cells  
323 located at roughly 2-10% EL were photoconverted at the blastoderm stage. In (A) and (C-E),  
324 embryos are oriented based on the AP/DV polarity of the egg with anterior to the left and  
325 dorsal to the top. In (A''), the surface of the egg is oriented to the bottom. In (B), the anterior  
326 of the germband is to the left. (A) is an average intensity projection of one egg hemisphere.  
327 (A') is an average intensity projection of 6  $\mu\text{m}$  to specifically show the dorsal epithelium. (B)  
328 is a maximum intensity projection of the whole germband. (C-E) are maximum intensity  
329 projections of one egg hemisphere. Abbreviations are: ventral ectoderm (VE) and dorsal  
330 ectoderm (DE). Scale bars are 50  $\mu\text{m}$ .

331

332 **A revised *Tribolium* amnion fatemap**

333 To determine which blastoderm cells give rise to the amnion, I analysed 85 embryos in which  
334 the dorsal and dorsolateral blastoderm cells were labelled by NLStdEos photoconversion as  
335 described above. I found that amnion cells arose from a very small domain of dorsal-most  
336 cells (that tapers from its anterior to posterior extent) and from a narrow strip of cells  
337 between the presumptive embryo and presumptive serosa (summarised in Fig 6 and S5 Fig).  
338 At 50% EL, only approximately the 6 most dorsal cells (approximately 8% of the  
339 circumference of the blastoderm) gave rise to all amnion cells stretching from one side of  
340 the thorax to the other (Fig 5(C), S1 Fig). Nearer to the posterior of the blastoderm (25% EL),  
341 even fewer cells gave rise to amnion (approximately 3 of the most dorsal cells;  
342 approximately 6% of the circumference; Fig 5(D), S2 Fig). The posterior limit of the amnion  
343 was difficult to define, as although some cells from approximately 5-10% EL appeared to  
344 become amnion (Fig5(E)), these cells condensed posteriorly towards the hindgut during  
345 germband retraction, and might have contributed to the hindgut tissue (S3 Fig, S7 Movie). I  
346 was unable to unambiguously determine the fate of these cells. At the anterior of the  
347 embryo, I found that a narrow strip of 1-2 cells between the presumptive embryo and  
348 presumptive serosa also gave rise to amnion (Fig 3(G-J)). While substantial additional work  
349 will be required to define a complete blastoderm fatemap for *Tribolium*, my findings clearly  
350 demonstrate that the 'amnion' domain is drastically smaller than previously proposed.

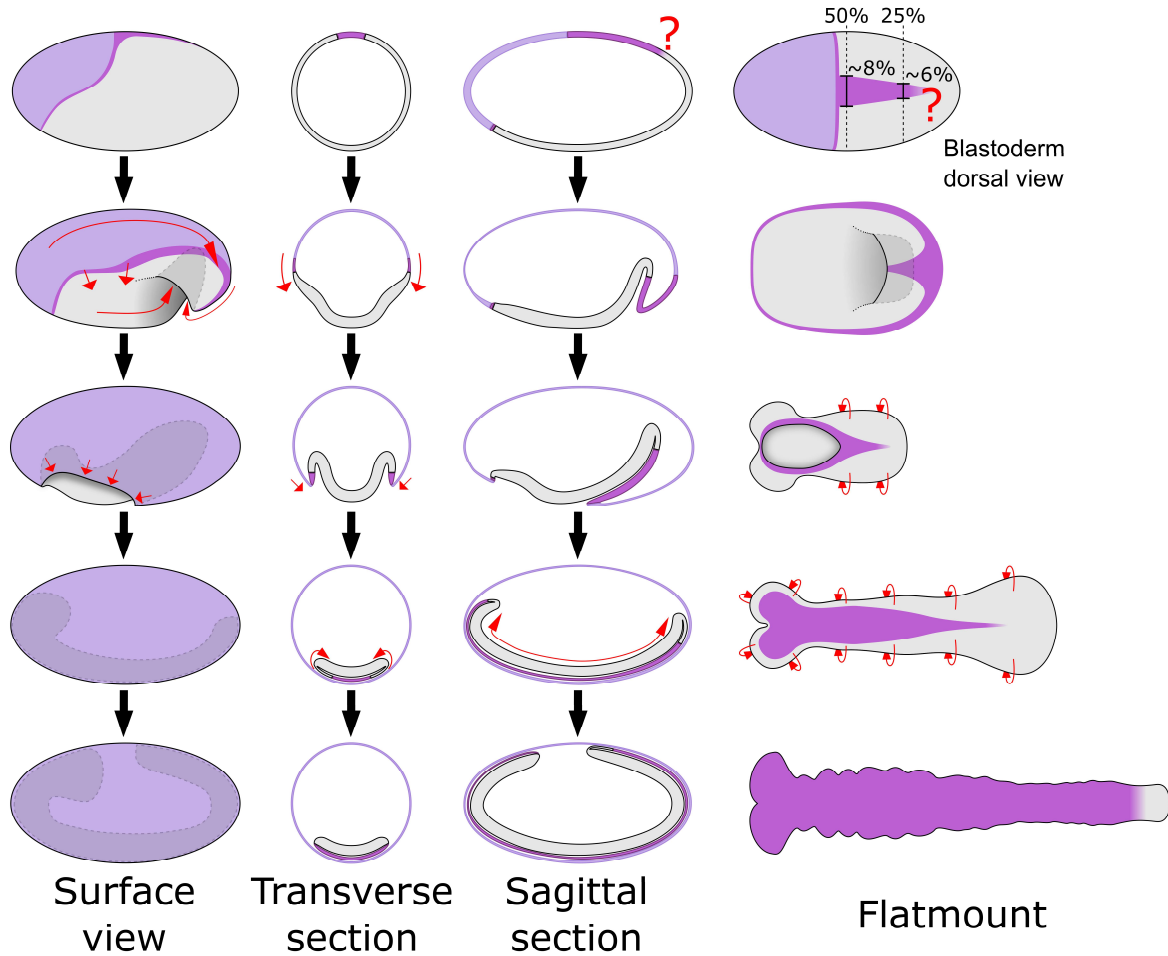

351

352 **Fig 6. Schematics showing the revised *Tribolium* fatemap and germband model.** Schematics

353 drawn as in Fig 1 to show the revised fatemap (top row; drawn directly from the numbers

354 described in the text) and germband model based on the results of this manuscript. Note

355 that the posterior amnion/embryo boundary is unclear. The schematics of the flatmounted

356 germbands are drawn with the focus on the dorsal epithelium. See text for additional details,

357 and S6 Fig for an extended figure with the classic and revised models side-by-side.

358

359

## 360 Discussion

361 In this article, I have shown that a majority of the cells currently thought to be

362 extraembryonic amnion actually give rise to embryonic tissue. Movement of these cells from

363 the dorsal side of the germband to the ventral side was visible in live cell tracking and  
364 differential cell labelling experiments. My results also indicate that the true amnion region  
365 differentiates progressively along the AP axis during GBE, as evidenced by differences in cell  
366 behaviour and the expression of the gene *Tc-srp*. Lastly, presumptive amnion cells  
367 predominantly originate from a small domain on the dorsal side of the blastoderm.

368

### 369 **A revised understanding of the short germ embryo**

370 The revision to the *Tribolium* blastoderm fatemap that I describe is essentially a quantitative  
371 shift in our understanding of where cell fate boundaries lie along the DV axis. In the revised  
372 fatemap (Fig 6, S5 Fig), the proportion of the blastoderm that gives rise to the presumptive  
373 amnion is much smaller than previously thought. The presumptive amnion domain is,  
374 therefore, remarkably similar in size to the amnioserosa domain of the *Drosophila*  
375 blastoderm fatemap [18]. However, it is important to recognize that fatemaps such as those  
376 presented here show a static picture of a dynamic process. There is no evidence that the  
377 presumptive amnion is specified at the blastoderm stage in *Tribolium*. Instead, the  
378 progressive changes in cell shape and *Tc-srp* expression in the dorsal epithelium of the  
379 germband suggest that the amnion is specified progressively along the AP axis during GBE.  
380 Progressive specification of DV cell fates during GBE fits with previous hypotheses [36,46],  
381 and analysis of how this process occurs represents an exciting avenue of future research (I  
382 discuss possible mechanisms below).

383 In contrast to the fatemap revision, the observation that cells move from the dorsal  
384 half of the germband to the ventral half of the germband represents a qualitative shift in our  
385 understanding of development in short/intermediate germ insects. In the classic model of  
386 short/intermediate germ development, the germband was thought of as a more-or-less flat

387 sheet of ectodermal cells (with mesoderm underneath) covered by the extraembryonic  
388 amnion. Because of this, the entire dorsal epithelium is routinely removed during embryo  
389 preparation, or not included in descriptions of gene expression patterns and embryonic  
390 phenotypes. Based on the new data presented here, it is obvious that we have been  
391 discarding or ignoring large parts of the embryo. Furthermore, the movement of cells from  
392 the dorsal epithelium into the ventral epithelium must be contributing to GBE, and is,  
393 therefore, a key aspect of the extension and overall development of the germband that has  
394 thus far been missed.

395         The revised model of the germband does present some technical challenges for  
396 future work on short/intermediate germ embryo. The flattened geometry of the germband  
397 makes it difficult to image both the dorsal and ventral epithelium using bright-field  
398 microscopy approaches. However, this problem can be overcome either by using  
399 fluorescence based techniques and confocal microscopy or by mechanical sectioning of the  
400 germband. Both approaches have been shown to work well in *Tribolium* (for example see  
401 [13,47] and results in this manuscript). In the rest of this article, I discuss why the revised  
402 fatemap and cell flow accord well with what we know about *Tribolium* development, and  
403 outline the implications of this discovery on our understanding of the evolution of insect  
404 development.

405

#### 406 **The cellular and molecular causes of tissue flow unify the blastoderm and the germband**

407 The revised model of the *Tribolium* germband reconciles the blastoderm and germband  
408 stages. The ectoderm of the germband is a continuous epithelium, which means that the  
409 movement of cells from the dorsal epithelium to the ventral epithelium occurs as a tissue  
410 level 'flow'. Such dorsal-to-ventral tissue flow also occurs during embryo condensation in



411 *Tribolium* [14], and I propose that the flow is caused by largely the same morphogenetic  
412 processes at both stages. The evidence for this hypothesis is summarised here, but for an  
413 extended discussion see Appendix 1 in S1 Text.

414         Three morphogenetic processes contribute to dorsal-to-ventral cell flow in *Tribolium*,  
415 and at least two of the three occur at both the blastoderm and germband stages. First,  
416 mediolateral cell intercalation occurs at both stages and causes tissue-wide convergence  
417 (along the DV axis) and extension (along the AP axis). This process requires two *Toll* genes  
418 that are expressed in rings around the entire blastoderm and germband epithelium [17].  
419 Second, tissue specific cell shape changes occur at both stages such that ventral/lateral cells  
420 become columnar and dorsal/dorsolateral cells become thinner (during condensation (S6 Fig  
421 )) or squamous (during GBE). The tissue level effect of these changes is contraction of the  
422 ventral/lateral tissue and spreading of the dorsal tissue. The flattening of dorsal/dorsolateral  
423 cells is likely regulated by BMP signalling, as not only does BMP activity correlate with the  
424 cell shape changes (see Appendix 1 in S1 Text), but functional disruption of BMP signalling  
425 components leads to uniform cell shape changes along the DV axis [25,48]. A third major  
426 morphogenetic event is gastrulation of the mesoderm. This occurs along the ventral midline,  
427 and as gastrulation occurs, the ectoderm moves ventrally to seal the gap left in the  
428 epithelium [47]. At the stage when a complete germband has formed, gastrulation is  
429 complete along most of the embryo. However, current data suggests mesoderm gastrulation  
430 may be ongoing in the SAZ [47]. If true, the ongoing invagination would contribute to tissue  
431 flow in this region.

432         It is important to note that while each of the events described here is involved in the  
433 dorsal-to-ventral tissue flow, no single event is absolutely required for it. In the absence of  
434 cell intercalation, embryo condensation and thinning of dorsal/dorsolateral ectoderm still

435 takes place, yielding abnormally wide and short germbands [17]. In the absence of tissue  
436 specific cell shape changes, condensation occurs in a more radially symmetrical manner  
437 yielding a tube-shaped germband that undergoes segment specification and convergent  
438 extension [25,48]. Finally, both condensation and GBE are only mildly affected in the  
439 absence of mesoderm specification [49]. This functional independence comes from each of  
440 the three processes being specified by different pathways (intercalation via segment  
441 specification, dorsal thinning via dorsal tissue specification, and gastrulation via ventral  
442 tissue specification). There may also be further, as yet undiscovered, morphogenetic events  
443 which also contribute to the dorsal-to-ventral tissue flow.

444

#### 445 **Reconciling long and short germ development**

446 I propose that the dorsal-to-ventral tissue flow occurring during embryo condensation and  
447 GBE in *Tribolium* is homologous to the dorsal-to-ventral tissue flow that occurs during  
448 gastrulation and GBE in *Drosophila* (Fig 1). This conclusion is based on the flow being driven  
449 by a conserved set of morphogenetic events.

450 As described above, tissue flow in *Tribolium* is caused by (1) mediolateral cell  
451 intercalation, (2) tissue specific cell shape changes along the DV axis, and (3) gastrulation at  
452 the ventral side of the embryo. As described below, equivalent processes are all observed in  
453 *Drosophila* as well.

454 In *Drosophila*, *Toll*-mediated mediolateral cell intercalation causes tissue-wide  
455 convergence (along the DV axis) and extension (along the AP axis) of the ectoderm during  
456 GBE [16]. As in *Tribolium*, the periodic expression of the *Toll* genes is regulated by the pair-  
457 rule genes. Conservation at the level of tissue identity, morphogenetic process, and  
458 molecular control strongly suggest *Toll*-mediated cell intercalation to be homologous.

459 Cell shape changes are harder to compare between *Drosophila* and *Tribolium*,  
460 because unlike in most insects, cellularisation in *Drosophila* leads to the direct formation of  
461 columnar cells [18,50]. However, tissue-specific cell shape changes along the DV axis do  
462 occur in *Drosophila* and are dependent on BMP signalling ([51,52]; for a detailed description  
463 see Appendix 2 in S1 Text). While the intracellular effectors of these cell shape changes are  
464 unknown, the dorsal patterning function of BMP signalling is homologous in *Drosophila* and  
465 *Tribolium*, and many dorsal cell specification genes are conserved between these two  
466 species [48].

467 Last, *Drosophila* mesoderm gastrulation also occurs along the ventral midline, and  
468 causes lateral/dorsolateral ectoderm to move ventrally [51]. Similar to the tissue specific cell  
469 shape changes described above, the intracellular effectors of *Tribolium* mesoderm  
470 gastrulation are unknown, but the upstream patterning events and the tissue specification  
471 genes are highly conserved [36,49]. Furthermore, mesoderm gastrulation at the ventral  
472 region of the embryo is widely observed within the insects, and is undoubtedly a  
473 homologous process in each species [53].

474 The conservation of the tissue-level flow during GEB, and the underlying processes  
475 driving that flow, shows that development in *Drosophila* and *Tribolium*, which are  
476 themselves models for long and short germ development respectively, are far more similar  
477 than previously thought. This similarity is further emphasised when the *Tribolium* germband  
478 is represented as a cylinder rather than its normal *in vivo* flattened shape (Fig 7). This finding  
479 helps explain how the long germ mode of development has evolved independently many  
480 times, as it takes fewer evolutionary 'steps' to go from one form to another than previously  
481 thought.

## *Tribolium*

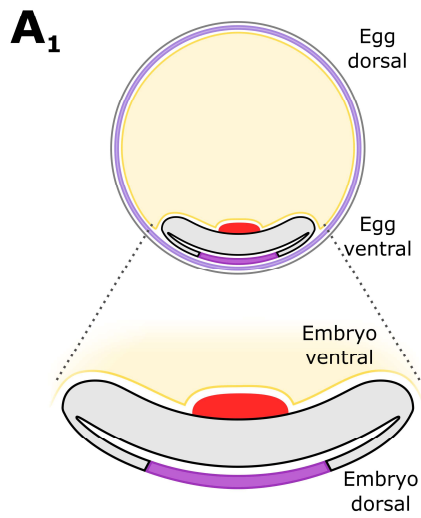

Rotate

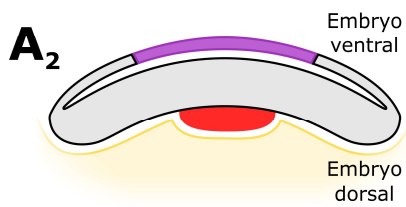

Unflatten

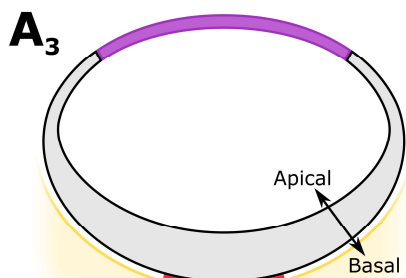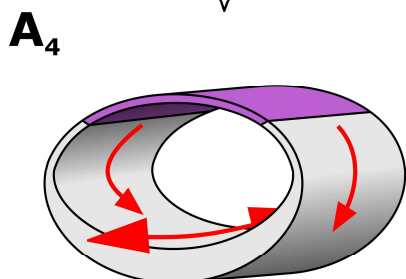

## *Drosophila*

**B<sub>1</sub>** Egg AND embryo dorsal

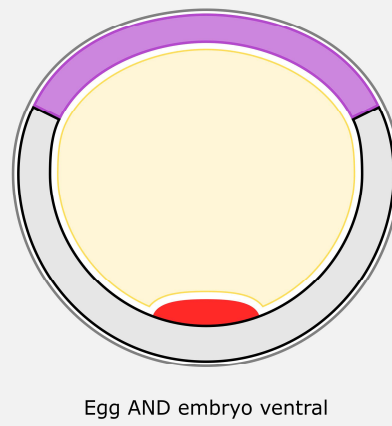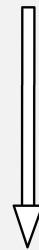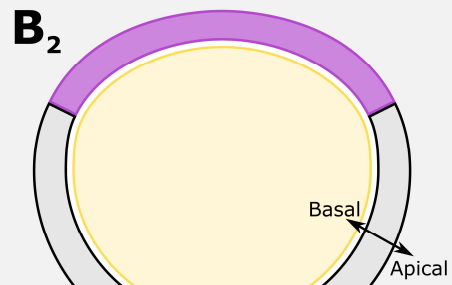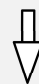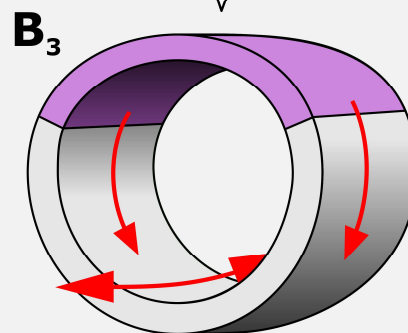

483 **Fig 7. Representation of the *Tribolium* germband as a cylinder.** ( $A_1$ ) the germband of  
484 *Tribolium* (and other short/intermediate insects) is usually drawn as it is in *in vivo*, that is, as  
485 a flattened shape with the ventral cell fates nearest the top and the dorsal cell fates nearest  
486 the bottom. Drawn in this way, the germband appears very different to that of the  
487 *Drosophila* embryo ( $B_1$ ). However, the *Tribolium* germband can be rotated ( $A_2$ ) and  
488 unflattened ( $A_3$ ) to highlight its cylindrical nature without changing the planar dimensions of  
489 the tissue itself. Following this transformation, the similarities in cell fate boundaries and  
490 overall structure of the *Tribolium* germband and *Drosophila* embryo ( $B_2$ ) become obvious.  
491 When the third dimension is incorporated to visualise the AP axis ( $A_4$  and  $B_3$ ), the similarities  
492 in the ongoing tissue rearrangements also become apparent. Note that while both ( $A_3$ ) and  
493 ( $B_2$ ) show cylindrical embryos, the epithelium of the *Tribolium* germband inverts during  
494 embryo condensation so the apical surface of the embryo faces inwards. Both (A) and (B) are  
495 sections from roughly the middle of the respective embryo during GBE. Possible flattening of  
496 dorsal tissue in *Drosophila* has been omitted due to a lack of detailed data at this stage.  
497 Tissue colouring is the same as in previous schematics, with the addition of mesoderm (red)  
498 and yolk (yellow).

499

500 While I have focused on *Tribolium* and *Drosophila* here, evidence exists that my new  
501 findings in *Tribolium* may also apply to other short/intermediate germ insects. For example,  
502 in the intermediate germ bug *Oncopeltus fasciatus*, the dorsal epithelium of the germband  
503 initially consists of a thick epithelium which progressively becomes squamous late during  
504 GBE ([54] and data not shown). These tissue-specific cell shape changes are likely the same  
505 as those occurring during *Tribolium* GBE. Furthermore, *Oncopeltus* pair-rule genes, Loto *Toll*  
506 genes and even segment polarity genes are expressed in rings around the entire germband

507 prior to thinning of the dorsal epithelium (shown but not described in [17,55,56]). The  
508 expression of these genes in the dorsal epithelium provides additional evidence that much of  
509 the *Oncopeltus* dorsal epithelium is made up of embryonic tissue. Future analyses of the  
510 molecular and morphogenetic drivers of GBE must analyse the entire germband, rather than  
511 focusing on the ventral half. In addition, further work is required to determine whether the  
512 new findings in *Tribolium* also apply to more basally branching insects such as crickets.

513

514 **The *Drosophila* posterior gut fold may represent an evolutionary remnant of short germ**  
515 **development**

516 Despite the deep conservation in morphogenetic events described above, there is an  
517 obvious difference between the germbands of *Drosophila* and *Tribolium*. While the  
518 *Drosophila* germband develops mostly on the egg surface with the apical side of the  
519 epithelium facing outwards, the epithelium of the *Tribolium* germband folds onto itself such  
520 that the apical side faces inwards (Fig 1, 7). The last common ancestor of *Tribolium* and  
521 *Drosophila* almost certainly exhibited short/intermediate germ development [57], which  
522 would include the formation of a bi-layered germband like that of *Tribolium*. As such, in the  
523 lineage leading to *Drosophila*, the epithelial folding that previously generated the bi-layered  
524 germband must have become heavily reduced during evolution.

525         However, I propose that a remnant of the ancestral folding still exists in *Drosophila*  
526 today, in what is now termed the “posterior gut fold”. The epithelial folding that causes the  
527 formation of the bi-layered germband of *Tribolium* initiates with a deep infolding of tissue at  
528 the posterior of the embryo (classically termed the posterior amniotic fold) [14,24].

529 Epithelial infolding also occurs at the posterior of the *Drosophila* blastoderm during posterior  
530 gut formation [58], and the similarities between these folds have been pointed out before

531 [24]. However, the evolutionary relationship of these two structures has been unclear due to  
532 the belief that the dorsal half of the fold in *Tribolium* gave rise to the amnion. Now, with the  
533 revised fatemap, it is clear that these folds form from the same region of the embryo.  
534 Therefore, I propose that the epithelial fold that forms during posterior gut formation in  
535 *Drosophila* is homologous to the posterior epithelial fold that forms during embryo  
536 condensation in *Tribolium*. This hypothesis is supported by two pieces of molecular data.  
537 First, a recent report found that a gene essential for hindgut development (the *Tribolium*  
538 ortholog of *senseless*) is already expressed at the posterior pole of the *Tribolium* embryo at  
539 the blastoderm stage [59]. Second, the *Tribolium* ‘posterior amniotic fold’ is controlled at the  
540 morphogenetic level by the Fog signalling pathway, just as is the *Drosophila* posterior gut  
541 fold (Frey et al. manuscript in preparation).

542         Due to this revised evolutionary relationship and the new *Tribolium* fatemap, I  
543 propose that the ‘posterior amniotic fold’ in *Tribolium* be renamed simply the ‘posterior  
544 fold’.

545

#### 546 **New insights in tissue patterning**

547 While I have predominantly focused on morphogenetic events in this manuscript, the  
548 revised model of short germ embryo development also has impacts for how we understand  
549 tissue patterning to occur in *Tribolium*. Here, I present one example of this, but for  
550 descriptions of pair-rule gene expression, posterior terminal gene expression, and of how DV  
551 patterning may be occurring in the germband, see Appendix 3 in S1 Text.

552         In *Tribolium*, segment polarity genes are expressed in a single stripe in each segment,  
553 with each domain appearing first near the ventral midline of the embryo before being  
554 activated in more dorsal cells [60–62]. Under the classic model, the ventral-to-dorsal

555 activation of expression appears to stop shortly after each domain first appears. However,  
556 the revised model shows that cells at the lateral edges of the germband move ventrally as  
557 cells from the dorsal epithelium move around the edges of the germband. This means that  
558 for each stripe of a segment polarity gene to ‘stay’ at the edge of the germband, cells at the  
559 correct AP location must activate segment polarity gene expression when they move around  
560 the edge of the germband. This can be thought of like Lewis Carroll’s Red Queen’s race,  
561 where “it takes all the running you can do, to keep in the same place” [63]. A similar ventral-  
562 to-dorsal activation of segment polarity gene expression can be seen in the *Drosophila*  
563 ectoderm ([64,65] S7 Fig), indicating that sequential ventral-to-dorsal activation of  
564 expression may be controlled by a conserved upstream mechanism.

565

## 566 **Conclusions**

567 The deep conservation of morphogenetic events that I am proposing here may seem  
568 unlikely, but I would argue that such conservation should have been expected from the  
569 beginning. The vast majority of morphogenetic events are controlled by upstream patterning  
570 networks. As such, morphogenesis can be viewed as a physical readout of such networks.  
571 Decades of research has shown that many of the key patterning genes that function during  
572 germband formation and extension in *Drosophila* have conserved roles in *Tribolium* and  
573 other insects. As such, without evidence to the contrary, conservation of the cellular events  
574 driven by these patterning genes makes perfect sense.

575

576

## 577 **Materials and methods**



578 *Tribolium* animal husbandry, egg collection, and RNA *in situ* hybridisation was performed as  
579 previously described [17]. The *Tc-srp* ortholog was previously described [66] and was cloned  
580 into pGEM-t (Promega Reference A1360) with primers TCCCGCTGCTTTGATCTAGT and  
581 TGCGATGACTGTGACGTGTA. The *Tc-cad* ortholog was as previously used [14].

582 The *H2B-ven* fusion was created by fusing the *D. melanogaster* histone *H2B* coding  
583 sequence (without the stop codon) from the published H2B-RFP [14] to the *venus*  
584 fluorescent protein [67] and cloning into the pSP64 Poly(A) (Promega Reference P1241)  
585 expression vector. The *NLS-tdEos* fusion was kindly provided by Matthias Pechmann.  
586 Additional details and both plasmids are available upon request to M. Pechmann or myself.  
587 Capped mRNA synthesis was performed as previously described [14]. *H2B-ven* capped mRNA  
588 was injected at 1 µg/µL, *NLS-tdEos* capped mRNA was injected at 2-3 µg/µL.

589 Embryo microinjection was performed as previously described [14], with the  
590 following changes. Up to 100 dechorionated embryos were mounted on a rectangular  
591 coverslip (24 mm by 50 mm) that rested on a microscope slide. Water was allowed to dry off  
592 the embryos before they were covered in Voltalef 10S halocarbon oil and injected as usual.  
593 The coverslip (still resting on the slide) was then placed in a petri-dish (92 mm) containing a  
594 base layer of 1% agarose (dissolved in water) and placed at 30-32°C until the embryos were  
595 at the appropriate stage for imaging. The coverslip was then removed from the slide,  
596 inverted (so that embryos were face down), and quickly but gently placed on a lumox dish  
597 (50 mm; Sarstedt Reference 94.6077.410) that was sitting upside down. The corners of the  
598 coverslip rested on the raised plastic lip of the dish such that the membrane and embryos  
599 were close to each other but not touching. To ensure lateral stability of the coverslip during  
600 the timelapse recording, approximately 5-10 µL of heptane glue (made by soaking parcel  
601 tape in heptane) was placed at each corner. Additional Voltalef 10S halocarbon oil was then

602 added to fill any remaining space between the coverslip and the oxygen permeable  
603 membrane. This contraption was then stuck to a microscope slide (using double sided tape)  
604 for imaging on an upright microscope. This last step may be unnecessary depending on the  
605 microscope stage and orientation.

606 Live imaging was performed on an upright Zeiss SP8 confocal microscope equipped  
607 with Hybrid detectors in the Biocentre Imaging facility (University of Cologne). Image stacks  
608 of 15-50 focal planes with z-steps ranging from 2-10  $\mu\text{m}$  were taken with a 10x/0.3NA dry  
609 objective or a 20x/0.7NA multi-immersion objective at intervals of 5-45 minutes. The  
610 temperature of the sample during imaging could not be carefully regulated, but was typically  
611 between 25-28 degrees. While this lack of temperature control is not ideal, it does not affect  
612 the findings presented in this manuscript.

613 Photoconversion of NLS-tdEos protein was performed by constantly scanning the  
614 region of interest for 20-30 seconds with the 405 wavelength laser at low power (5%). These  
615 settings were manually determined on the above microscope, and need to be determined  
616 independently on different systems. Photoconversions were performed during the final  
617 uniform blastoderm stage, as photoconversion prior to this resulted in substantial diffusion  
618 of the photoconverted protein during nuclei division. The positions of the different regions  
619 of the embryo (75% EL etc.) were determined by measuring the length of each embryo in the  
620 LASX software and selecting the appropriate region. Photoconversions were performed on  
621 all embryos on the coverslip before setting up the timelapse, which led to a 0.5-2 hour delay  
622 between performing the photoconversion and beginning the timelapse. As such, the  
623 positions of the photoconverted region at the first time point in the timelapses in this  
624 manuscript do not reflect the original region of photoconversion.

625           Imaging of fixed material was performed on an upright Zeiss SP8 confocal, an upright  
626 Zeiss SP5 confocal microscope and an inverted Zeiss SP5 confocal microscope. The  
627 *Drosophila gooseberry* expression patterns were kindly provided by Erik Clark and acquired  
628 as in [68]. Images and timelapses were analysed using FIJI [69] and Photoshop CS5. Manual  
629 cell tracking was performed on confocal hyperstacks with MTrackJ [70]. The figures were  
630 arranged and the schematics created using Inkscape.

631

632

### 633 **Acknowledgements**

634 This article is dedicated to Siegfried Roth on the occasion of his 60<sup>th</sup> birthday (2017); for the  
635 years of support, encouragement, and, most importantly, inspiration. I thank E. Clark for  
636 stimulating discussions, extensive feedback on the manuscript, and for providing the  
637 *Drosophila* images. I thank M. Pechmann for providing the *NLS-tdEos* construct and S. Roth  
638 for supporting me during this project. In addition, I thank M. Akam, M. Pechmann and S.  
639 Roth for comments on the manuscript.

640

641

### 642 **References**

- 643 1. Grimaldi D, Engel M. Evolution of the Insects. Cambridge University Press; 2005.
- 644 2. Anderson DT. Embryology and Phylogeny in Annelids and Arthropod. Pergamon Press;  
645 1973.
- 646 3. Jaeger J. The gap gene network. Cell Mol Life Sci. 2011;68: 243–74.  
647 doi:10.1007/s00018-010-0536-y
- 648 4. Davis GK, Patel NH. SHORT, LONG, AND BEYOND: Molecular and Embryological

- 649 Approaches to. *Annu Rev Entomol.* 2002; 669–99.
- 650 5. Peel AD, Chipman AD, Akam M. Arthropod segmentation: beyond the *Drosophila*  
651 paradigm. *Nat Rev Genet.* 2005;6: 905–16. doi:10.1038/nrg1724
- 652 6. Irvine KD, Wieschaus E. Cell intercalation during *Drosophila* germband extension and  
653 its regulation by pair-rule segmentation genes. *Development.* 1994;120: 827–41.  
654 Available: <http://www.ncbi.nlm.nih.gov/pubmed/7600960>
- 655 7. Bertet C, Sulak L, Lecuit T. Myosin-dependent junction remodelling controls planar cell  
656 intercalation and axis elongation. *Nature.* 2004;429: 667–671. Available:  
657 <http://dx.doi.org/10.1038/nature02590>
- 658 8. Collinet C, Rauzi M, Lenne P, Lecuit T. Local and tissue-scale forces drive oriented  
659 junction growth during tissue extension. *Nat Cell Biol.* 2015;17: 1247–1258.  
660 doi:10.1038/ncb3226
- 661 9. Butler LC, Blanchard GB, Kabla AJ, Lawrence NJ, Welchman DP, Mahadevan L, et al.  
662 Cell shape changes indicate a role for extrinsic tensile forces in *Drosophila* germ-band  
663 extension. *Nat Cell Biol.* Nature Publishing Group; 2009;11: 859–64.  
664 doi:10.1038/ncb1894
- 665 10. Firmino AAP, Fonseca FC de A, de Macedo LLP, Coelho RR, Antonino de Souza Jr JD,  
666 Togawa RC, et al. Transcriptome Analysis in Cotton Boll Weevil (*Anthonomus grandis*)  
667 and RNA Interference in Insect Pests. *PLoS One.* 2013;8: e85079.  
668 doi:10.1371/journal.pone.0085079
- 669 11. da Silva SM, Vincent J-P. Oriented cell divisions in the extending germband of  
670 &lt;em>&lt;/em>*Drosophila*&lt;/em>; *Development.* 2007;134: 3049 LP-3054. Available:  
671 <http://dev.biologists.org/content/134/17/3049.abstract>
- 672 12. Liu PZ, Kaufman TC. Short and long germ segmentation: unanswered questions in the

- 673 evolution of a developmental mode. *Evol Dev.* 2005;7: 629–46. doi:10.1111/j.1525-  
674 142X.2005.05066.x
- 675 13. Sarrazin AF, Peel AD, Averof M. A segmentation clock with two-segment periodicity in  
676 insects. *Science.* 2012;336: 338–41. doi:10.1126/science.1218256
- 677 14. Benton MA, Akam M, Pavlopoulos A. Cell and tissue dynamics during *Tribolium*  
678 embryogenesis revealed by versatile fluorescence labeling approaches. *Development.*  
679 2013;140: 3210–3220. doi:10.1242/dev.096271
- 680 15. Nakamoto A, Hester SD, Constantinou SJ, Blaine WG, Tewksbury AB, Matei MT, et al.  
681 Changing cell behaviours during beetle embryogenesis correlates with slowing of  
682 segmentation. *Nat Commun.* Nature Publishing Group; 2015;6: 6635.  
683 doi:10.1038/ncomms7635
- 684 16. Paré AC, Vichas A, Fincher CT, Mirman Z, Farrell DL, Mainieri A, et al. A positional Toll  
685 receptor code directs convergent extension in *Drosophila*. *Nature.* 2014;515: 523–  
686 527. doi:10.1038/nature13953
- 687 17. Benton MA, Pechmann M, Frey N, Stappert D, Conrads KHKH, Chen Y-TY-T, et al. Toll  
688 Genes Have an Ancestral Role in Axis Elongation. *Curr Biol.* Elsevier Ltd; 2016;26:  
689 1609–1615. doi:10.1016/j.cub.2016.04.055
- 690 18. Campos-Ortega J a, Hartenstein V. The embryonic development of *Drosophila*  
691 melanogaster. 2nd ed. Springer-Verlag Berlin Heidelberg; 1997.
- 692 19. Schönauer A, Paese CLB, Hilbrant M, Leite DJ, Schwager EE, Feitosa NM, et al. The Wnt  
693 and Delta-Notch signalling pathways interact to direct pair-rule gene expression via  
694 caudal during segment addition in the spider *Parasteatoda tepidariorum*.  
695 *Development.* 2016; 2455–2463. doi:10.1242/dev.131656
- 696 20. Janssen R. Gene expression suggests double-segmental and single-segmental

- 697 patterning mechanisms during posterior segment addition in the beetle *Tribolium*  
698 *castaneum*. *Int J Dev Biol*. 2014;58. doi:10.1387/ijdb.140058rj
- 699 21. Clark E. Dynamic patterning by the *Drosophila* pair-rule network reconciles long-germ  
700 and short-germ segmentation. Desplan C, editor. *PLOS Biol*. 2017;15: e2002439.  
701 doi:10.1371/journal.pbio.2002439
- 702 22. van der Zee M, Berns N, Roth S. Distinct Functions of the *Tribolium* *zerknüllt* Genes in  
703 Serosa Specification and Dorsal Closure. *Curr Biol*. 2005;15: 624–636.  
704 doi:10.1016/j.cub.2005.02.057
- 705 23. Falciani F, Hausdorf B, Schröder R, Akam M, Tautz D, Denell R, et al. Class 3 Hox genes  
706 in insects and the origin of *zen*. *Proc Natl Acad Sci USA*. 1996;93: 8479–8484.
- 707 24. Handel K, Grünfelder CG, Roth S, Sander K. *Tribolium* embryogenesis: a SEM study of  
708 cell shapes and movements from blastoderm to serosal closure. *Dev Genes*. 2000;
- 709 25. Nunes da Fonseca R, von Levetzow C, Kalscheuer P, Basal A, van der Zee M, Roth S.  
710 Self-Regulatory Circuits in Dorsoventral Axis Formation of the Short-Germ Beetle  
711 *Tribolium castaneum*. *Dev Cell*. 2008;14: 605–615.  
712 doi:<https://doi.org/10.1016/j.devcel.2008.02.011>
- 713 26. Schmidt-Ott U, Kwan CW. Morphogenetic functions of extraembryonic membranes in  
714 insects. *Curr Opin Insect Sci*. Elsevier Inc; 2016;13: 86–92.  
715 doi:10.1016/j.cois.2016.01.009
- 716 27. Panfilio K a. Extraembryonic development in insects and the acrobatics of  
717 blastokinesis. *Dev Biol*. 2008;313: 471–91. doi:10.1016/j.ydbio.2007.11.004
- 718 28. Benton MA, Pavlopoulos A. *Tribolium* embryo morphogenesis: May the force be with  
719 you. *Bioarchitecture*. 2014;4: 16–21. doi:10.4161/bioa.27815
- 720 29. Schmidt-Ott U. The amnioserosa is an apomorphic character of cyclorrhaphan flies.

- 721 Dev Genes Evol. 2000;210: 373–376. doi:10.1007/s004270000068
- 722 30. Rafiqi AM, Lemke S, Ferguson S, Stauber M, Schmidt-Ott U. Evolutionary origin of the  
723 amnioserosa in cyclorrhaphan flies correlates with spatial and temporal expression  
724 changes of zen. Proc Natl Acad Sci U S A. 2008;105: 234–9.  
725 doi:10.1073/pnas.0709145105
- 726 31. Rafiqi AM, Park C, Kwan CW, Lemke S, Schmidt-ott U. BMP-dependent serosa and  
727 amnion specification in the scuttle fly *Megaselia abdita*. 2012;3382: 3373–3382.  
728 doi:10.1242/dev.083873
- 729 32. Kwan CW, Gavin-Smyth J, Ferguson EL, Schmidt-Ott U. Functional evolution of a  
730 morphogenetic gradient. Bronner M, editor. Elife. eLife Sciences Publications, Ltd;  
731 2016;5: e20894. doi:10.7554/eLife.20894
- 732 33. Caroti F, González Avalos E, González Avalos P, Kromm D, Noeske V, Wosch M, et al. In  
733 toto live imaging in scuttle fly *Megaselia abdita* reveals transitions towards a novel  
734 extraembryonic architecture. bioRxiv. 2018; Available:  
735 <http://biorxiv.org/content/early/2018/01/15/236364.abstract>
- 736 34. Jacobs CGC, Spaink HP, van der Zee M. The extraembryonic serosa is a frontier  
737 epithelium providing the insect egg with a full-range innate immune response. Elife.  
738 2014;3: 1–21. doi:10.7554/eLife.04111
- 739 35. Jacobs CGC, Van Der Zee M. Immune competence in insect eggs depends on the  
740 extraembryonic serosa. Dev Comp Immunol. 2013;41. doi:10.1016/j.dci.2013.05.017
- 741 36. Lynch JA, Roth S. The evolution of dorsal-ventral patterning mechanisms in insects.  
742 Genes Dev. 2011;25: 107–118. doi:10.1101/gad.2010711
- 743 37. Horn T, Panfilio KA. Novel functions for Dorsocross in epithelial morphogenesis in the  
744 beetle *Tribolium castaneum*. Development. 2016;143: 3002–3011.

745 doi:10.1242/dev.133280

746 38. Anderson DT. The Development of Holometabolous Insects. In: Counce SJ, Waddington  
747 CH, editors. Developmental systems Insects, Vol 1. New York: Academic Press; 1972.  
748 pp. 165–242.

749 39. Anderson DT. The Development of Hemimetabolous Insects. In: Counce SJ,  
750 Waddington CH, editors. Developmental systems Insects, Vol 1. New York: Academic  
751 Press; 1972. pp. 95–163.

752 40. Aranda M, Marques-Souza H, Bayer T, Tautz D. The role of the segmentation gene  
753 hairy in *Tribolium*. *Dev Genes Evol.* 2008;218: 465–77. doi:10.1007/s00427-008-0240-  
754 1

755 41. Benton MA. Fluorescent live imaging of differentially labeled *Tribolium* embryos  
756 [Internet]. Database: figshare [Internet]. 2018. Available:  
757 [https://figshare.com/authors/Matthew\\_Benton/4693354](https://figshare.com/authors/Matthew_Benton/4693354)

758 42. Tomancak P, Berman BP, Beaton A, Weizmann R, Kwan E, Hartenstein V, et al. Global  
759 analysis of patterns of gene expression during *Drosophila* embryogenesis. *Genome*  
760 *Biol. England*; 2007;8: R145. doi:10.1186/gb-2007-8-7-r145

761 43. Hammonds AS, Bristow CA, Fisher WW, Weizmann R, Wu S, Hartenstein V, et al.  
762 Spatial expression of transcription factors in *Drosophila* embryonic organ  
763 development. *Genome Biol. England*; 2013;14: R140. doi:10.1186/gb-2013-14-12-r140

764 44. Tomancak P, Beaton A, Weizmann R, Kwan E, Shu S, Lewis SE, et al. Systematic  
765 determination of patterns of gene expression during *Drosophila* embryogenesis.  
766 *Genome Biol. England*; 2002;3: RESEARCH0088.

767 45. Sam S, Leise W, Hoshizaki DK. The serpent gene is necessary for progression through  
768 the early stages of fat-body development. *Mech Dev.* 1996;60: 197–205. Available:



- 769 <http://www.ncbi.nlm.nih.gov/pubmed/9025072>
- 770 46. Sachs L, Chen YT, Drechsler A, Lynch JA, Panfilio KA, Lässig M, et al. Dynamic BMP  
771 signaling polarized by Toll patterns the dorsoventral axis in a hemimetabolous insect.  
772 *Elife*. 2015;4. doi:10.7554/eLife.05502
- 773 47. Handel K, Basal A, Fan X, Roth S. *Tribolium castaneum* twist: gastrulation and  
774 mesoderm formation in a short-germ beetle. *Dev Genes Evol*. 2005;215: 13–31.
- 775 48. van der Zee M, Stockhammer O, von Levetzow C, Nunes da Fonseca R, Roth S.  
776 *Sog/Chordin* is required for ventral-to-dorsal *Dpp/BMP* transport and head formation  
777 in a short germ insect. *Proc Natl Acad Sci U S A*. 2006;103: 16307–12.  
778 doi:10.1073/pnas.0605154103
- 779 49. Stappert D, Frey N, von Levetzow C, Roth S. Genome-wide identification of *Tribolium*  
780 dorsoventral patterning genes. *Development*. 2016;143: 2443–2454.  
781 doi:10.1242/dev.130641
- 782 50. van der Zee M, Benton MA, Vazquez-Faci T, Lamers GEM, Jacobs CGC, Rabouille C.  
783 *Innexin7a* forms junctions that stabilize the basal membrane during cellularization of  
784 the blastoderm in *Tribolium castaneum*. *Development*. 2015;142: 2173–2183.  
785 doi:10.1242/dev.097113
- 786 51. Rauzi M, Krzic U, Saunders TE, Krajnc M, Zihlerl P, Hufnagel L, et al. Embryo-scale tissue  
787 mechanics during *Drosophila* gastrulation movements. *Nat Commun*. The Author(s);  
788 2015;6: 8677. Available: <http://dx.doi.org/10.1038/ncomms9677>
- 789 52. Leptin M, Grunewald B. Cell shape changes during gastrulation in *Drosophila*.  
790 *Development*. 1990;110: 73 LP-84. Available:  
791 <http://dev.biologists.org/content/110/1/73.abstract>
- 792 53. Roth S. Gastrulation in Other Insects. In: Stern CD, editor. *Gastrulation From Cells to*

- 793 Embryo. New York: Cold Spring Harbor Laboratory Press; 2004. pp. 105–121.
- 794 54. Ewen-Campen B, Jones TEM, Extavour CG. Evidence against a germ plasm in the  
795 milkweed bug *Oncopeltus fasciatus*, a hemimetabolous insect. *Biol Open*. 2013;2:  
796 556–68. doi:10.1242/bio.20134390
- 797 55. Erezylmaz DF, Kelstrup HC, Riddiford LM. The nuclear receptor E75A has a novel pair-  
798 rule-like function in patterning the milkweed bug, *Oncopeltus fasciatus*. *Dev Biol*.  
799 Elsevier Inc.; 2009;334: 300–10. doi:10.1016/j.ydbio.2009.06.038
- 800 56. Liu PZ, Kaufman TC. even-skipped is not a pair-rule gene but has segmental and gap-  
801 like functions in *Oncopeltus fasciatus*, an intermediate germband insect.  
802 *Development*. 2005;132: 2081–92. doi:10.1242/dev.01807
- 803 57. Peel AD. The evolution of developmental gene networks: lessons from comparative  
804 studies on holometabolous insects. *Philos Trans R Soc Lond B Biol Sci*. 2008;363:  
805 1539–47. doi:10.1098/rstb.2007.2244
- 806 58. Turner FR, Mahowald AP. Scanning Electron Microscopy of *Drosophila* Embryogenesis  
807 II. Gastrulation and Segmentation. 1977;416: 403–416.
- 808 59. Oberhofer G, Grossmann D, Siemanowski JL, Beissbarth T, Bucher G. Wnt/beta-  
809 catenin signaling integrates patterning and metabolism of the insect growth zone.  
810 *Development*. England; 2014;141: 4740–4750. doi:10.1242/dev.112797
- 811 60. Nagy LM, Carroll S. Conservation of wingless patterning functions in the short-germ  
812 embryos of *Tribolium castaneum*. *Nature*. 1994;367: 460–463. doi:10.1038/367460a0
- 813 61. Brown SJ, Patel NH, Denell RE. Embryonic expression of the single *Tribolium* engrailed  
814 homolog. *Dev Genet*. Wiley Subscription Services, Inc., A Wiley Company; 1994;15: 7–  
815 18. doi:10.1002/dvg.1020150103
- 816 62. Savard J, Marques-Souza H, Aranda M, Tautz D. A segmentation gene in *tribolium*

- 817 produces a polycistronic mRNA that codes for multiple conserved peptides. *Cell*.  
818 2006;126: 559–69. doi:10.1016/j.cell.2006.05.053
- 819 63. Carroll L. *Alice's Adventures in Wonderland*. New York: Macmillan; 1865.
- 820 64. Baumgartner S, Bopp D, Burri M, Noll M. Structure of two genes at the gooseberry  
821 locus related to the paired gene and their spatial expression during *Drosophila*  
822 embryogenesis. *Genes Dev* . 1987;1: 1247–1267. doi:10.1101/gad.1.10.1247
- 823 65. DiNardo S, Kuner JM, Theis J, O'Farrell PH. Development of embryonic pattern in *D*.  
824 *melanogaster* as revealed by accumulation of the nuclear engrailed protein. *Cell*.  
825 1985;43: 59–69. doi:10.1016/0092-8674(85)90012-1
- 826 66. Gillis WQ, Bowerman B a, Schneider SQ. The evolution of protostome GATA factors:  
827 molecular phylogenetics, synteny, and intron/exon structure reveal orthologous  
828 relationships. *BMC Evol Biol*. 2008;8: 112. doi:10.1186/1471-2148-8-112
- 829 67. Nagai T, Ibata K, Park ES, Kubota M, Mikoshiba K, Miyawaki A. A variant of yellow  
830 fluorescent protein with fast and efficient maturation for cell-biological applications.  
831 *Nat Biotechnol*. Nature Publishing Group; 2002;20: 87. Available:  
832 <http://dx.doi.org/10.1038/nbt0102-87>
- 833 68. Clark E, Akam M. Odd-paired controls frequency doubling in *Drosophila* segmentation  
834 by altering the pair-rule gene regulatory network. *Elife*. England; 2016;5.  
835 doi:10.7554/eLife.18215
- 836 69. Schindelin J, Arganda-Carreras I, Frise E, Kaynig V, Longair M, Pietzsch T, et al. Fiji: an  
837 open-source platform for biological-image analysis. *Nat Methods*. 2012;9: 676–82.  
838 doi:10.1038/nmeth.2019
- 839 70. Meijering E, Dzyubachyk O, Smal I. Methods for cell and particle tracking. [Internet].  
840 1st ed. *Methods in enzymology*. United States: Elsevier Inc.; 2012. doi:10.1016/B978-

841 0-12-391857-4.00009-4

842

# Drosophila

# Tribolium

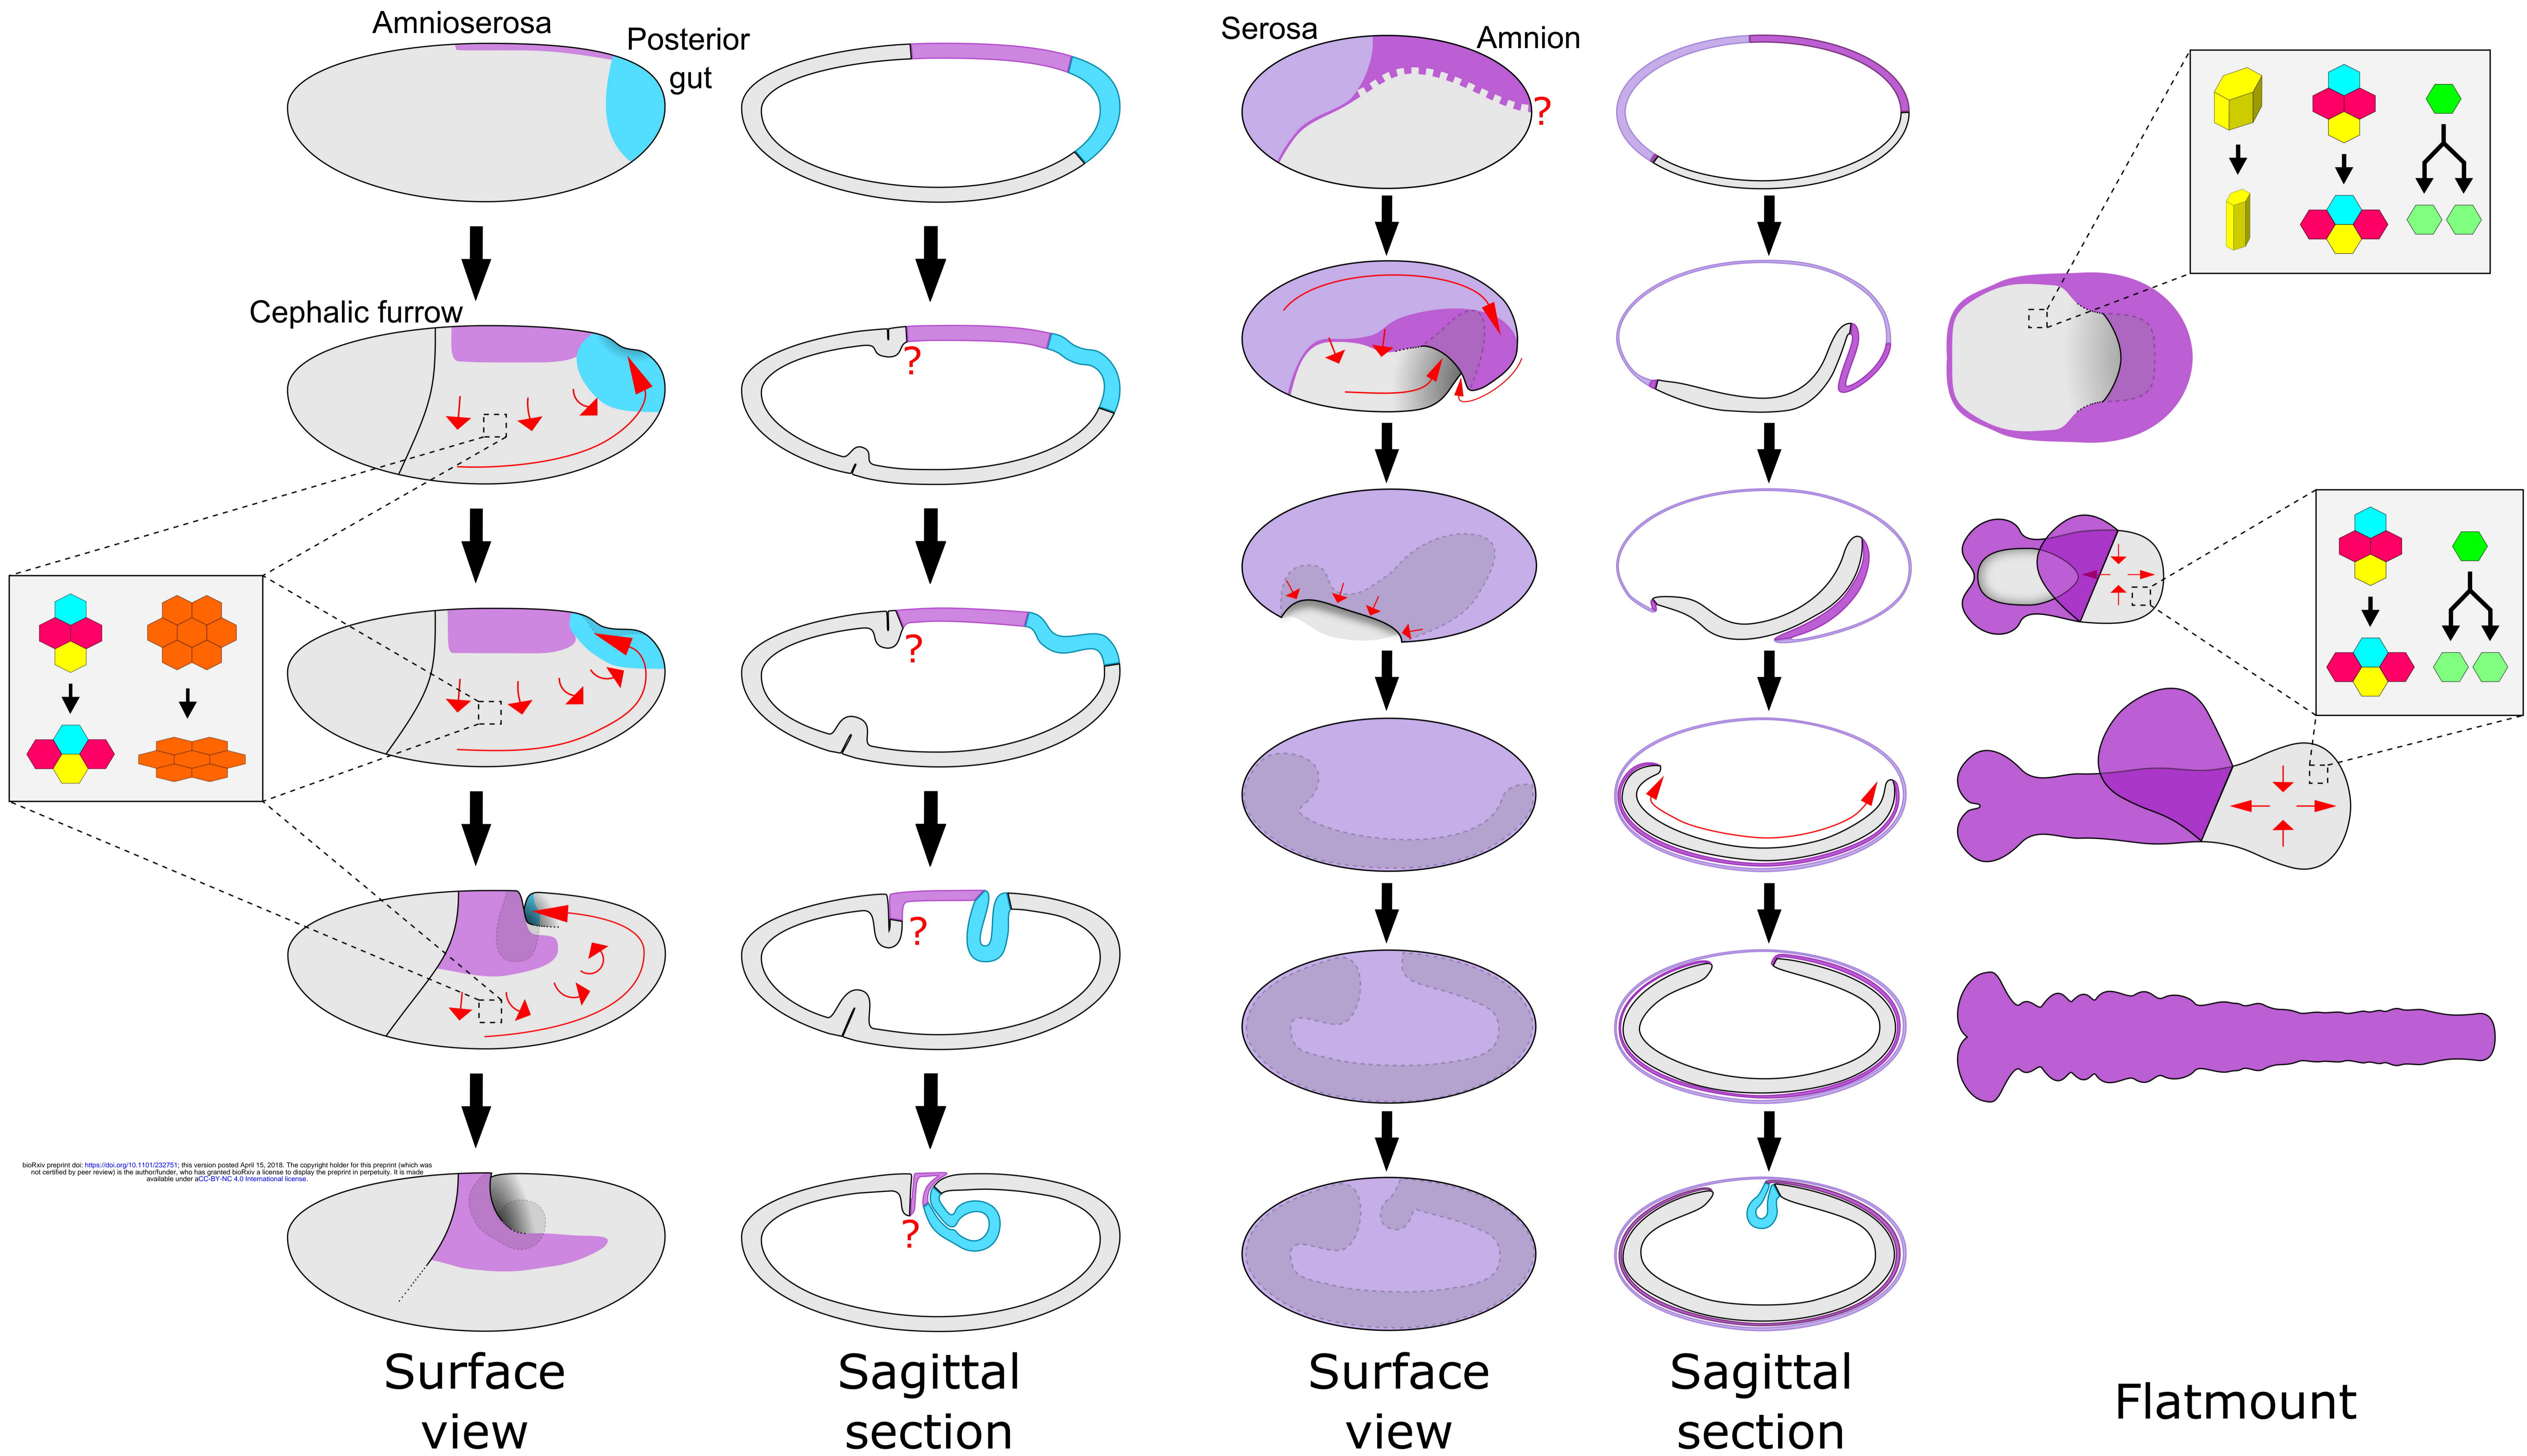

bioRxiv preprint doi: <https://doi.org/10.1101/232751>; this version posted April 15, 2018. The copyright holder for this preprint (which was not certified by peer review) is the author/funder, who has granted bioRxiv a license to display the preprint in perpetuity. It is made available under aCC-BY-NC 4.0 International license.

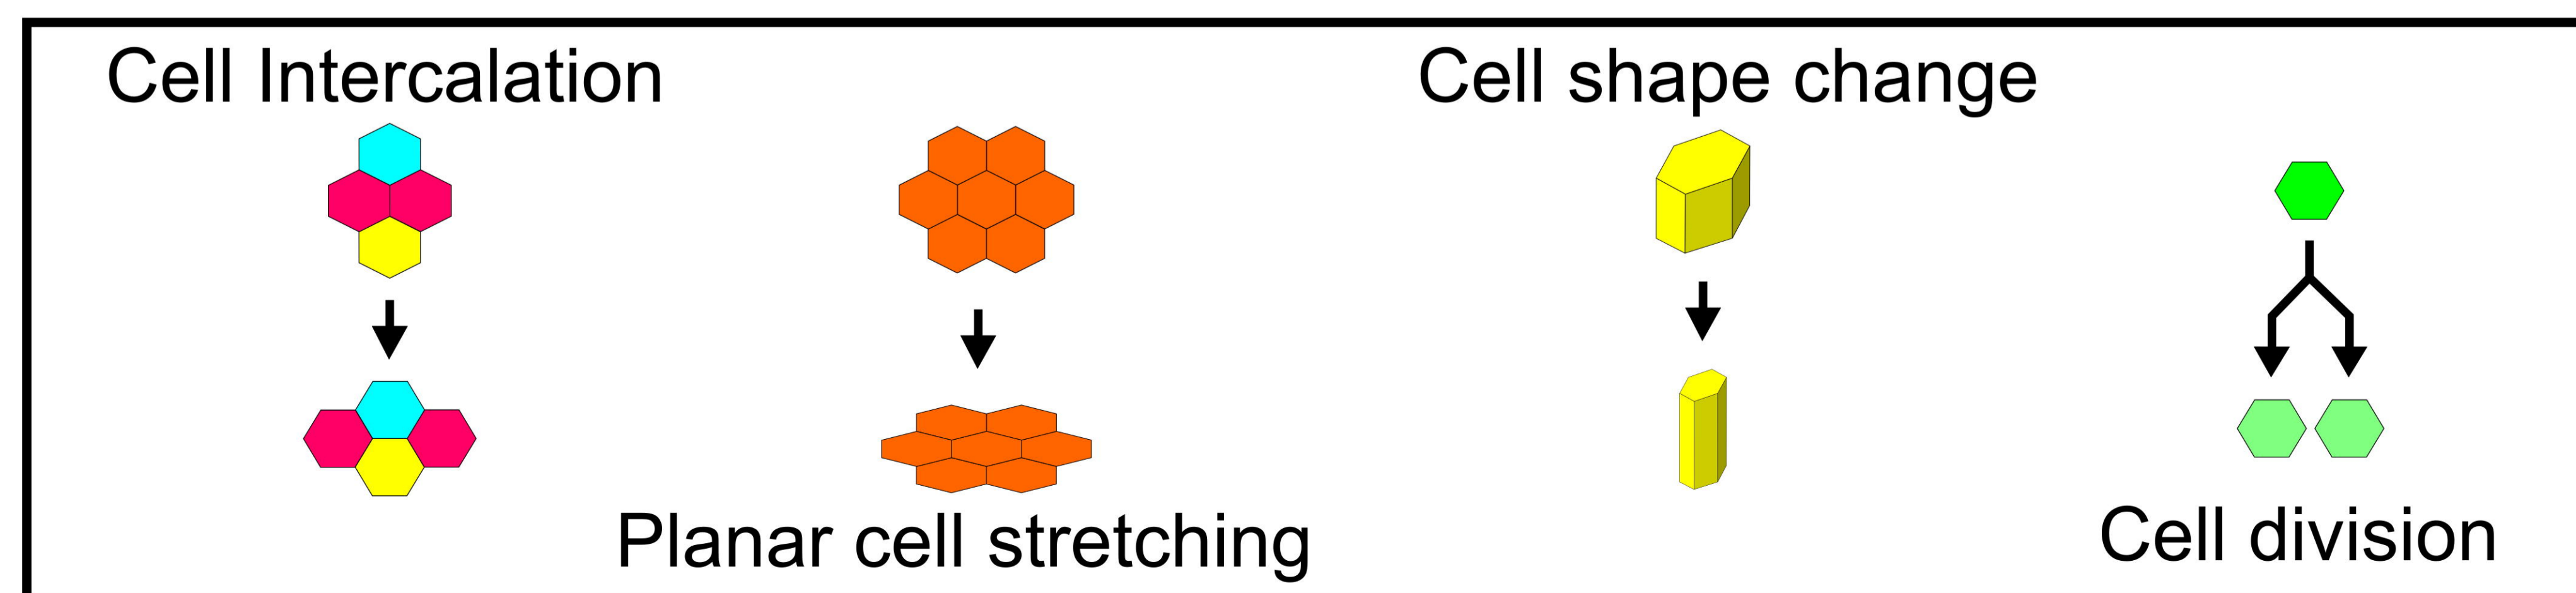

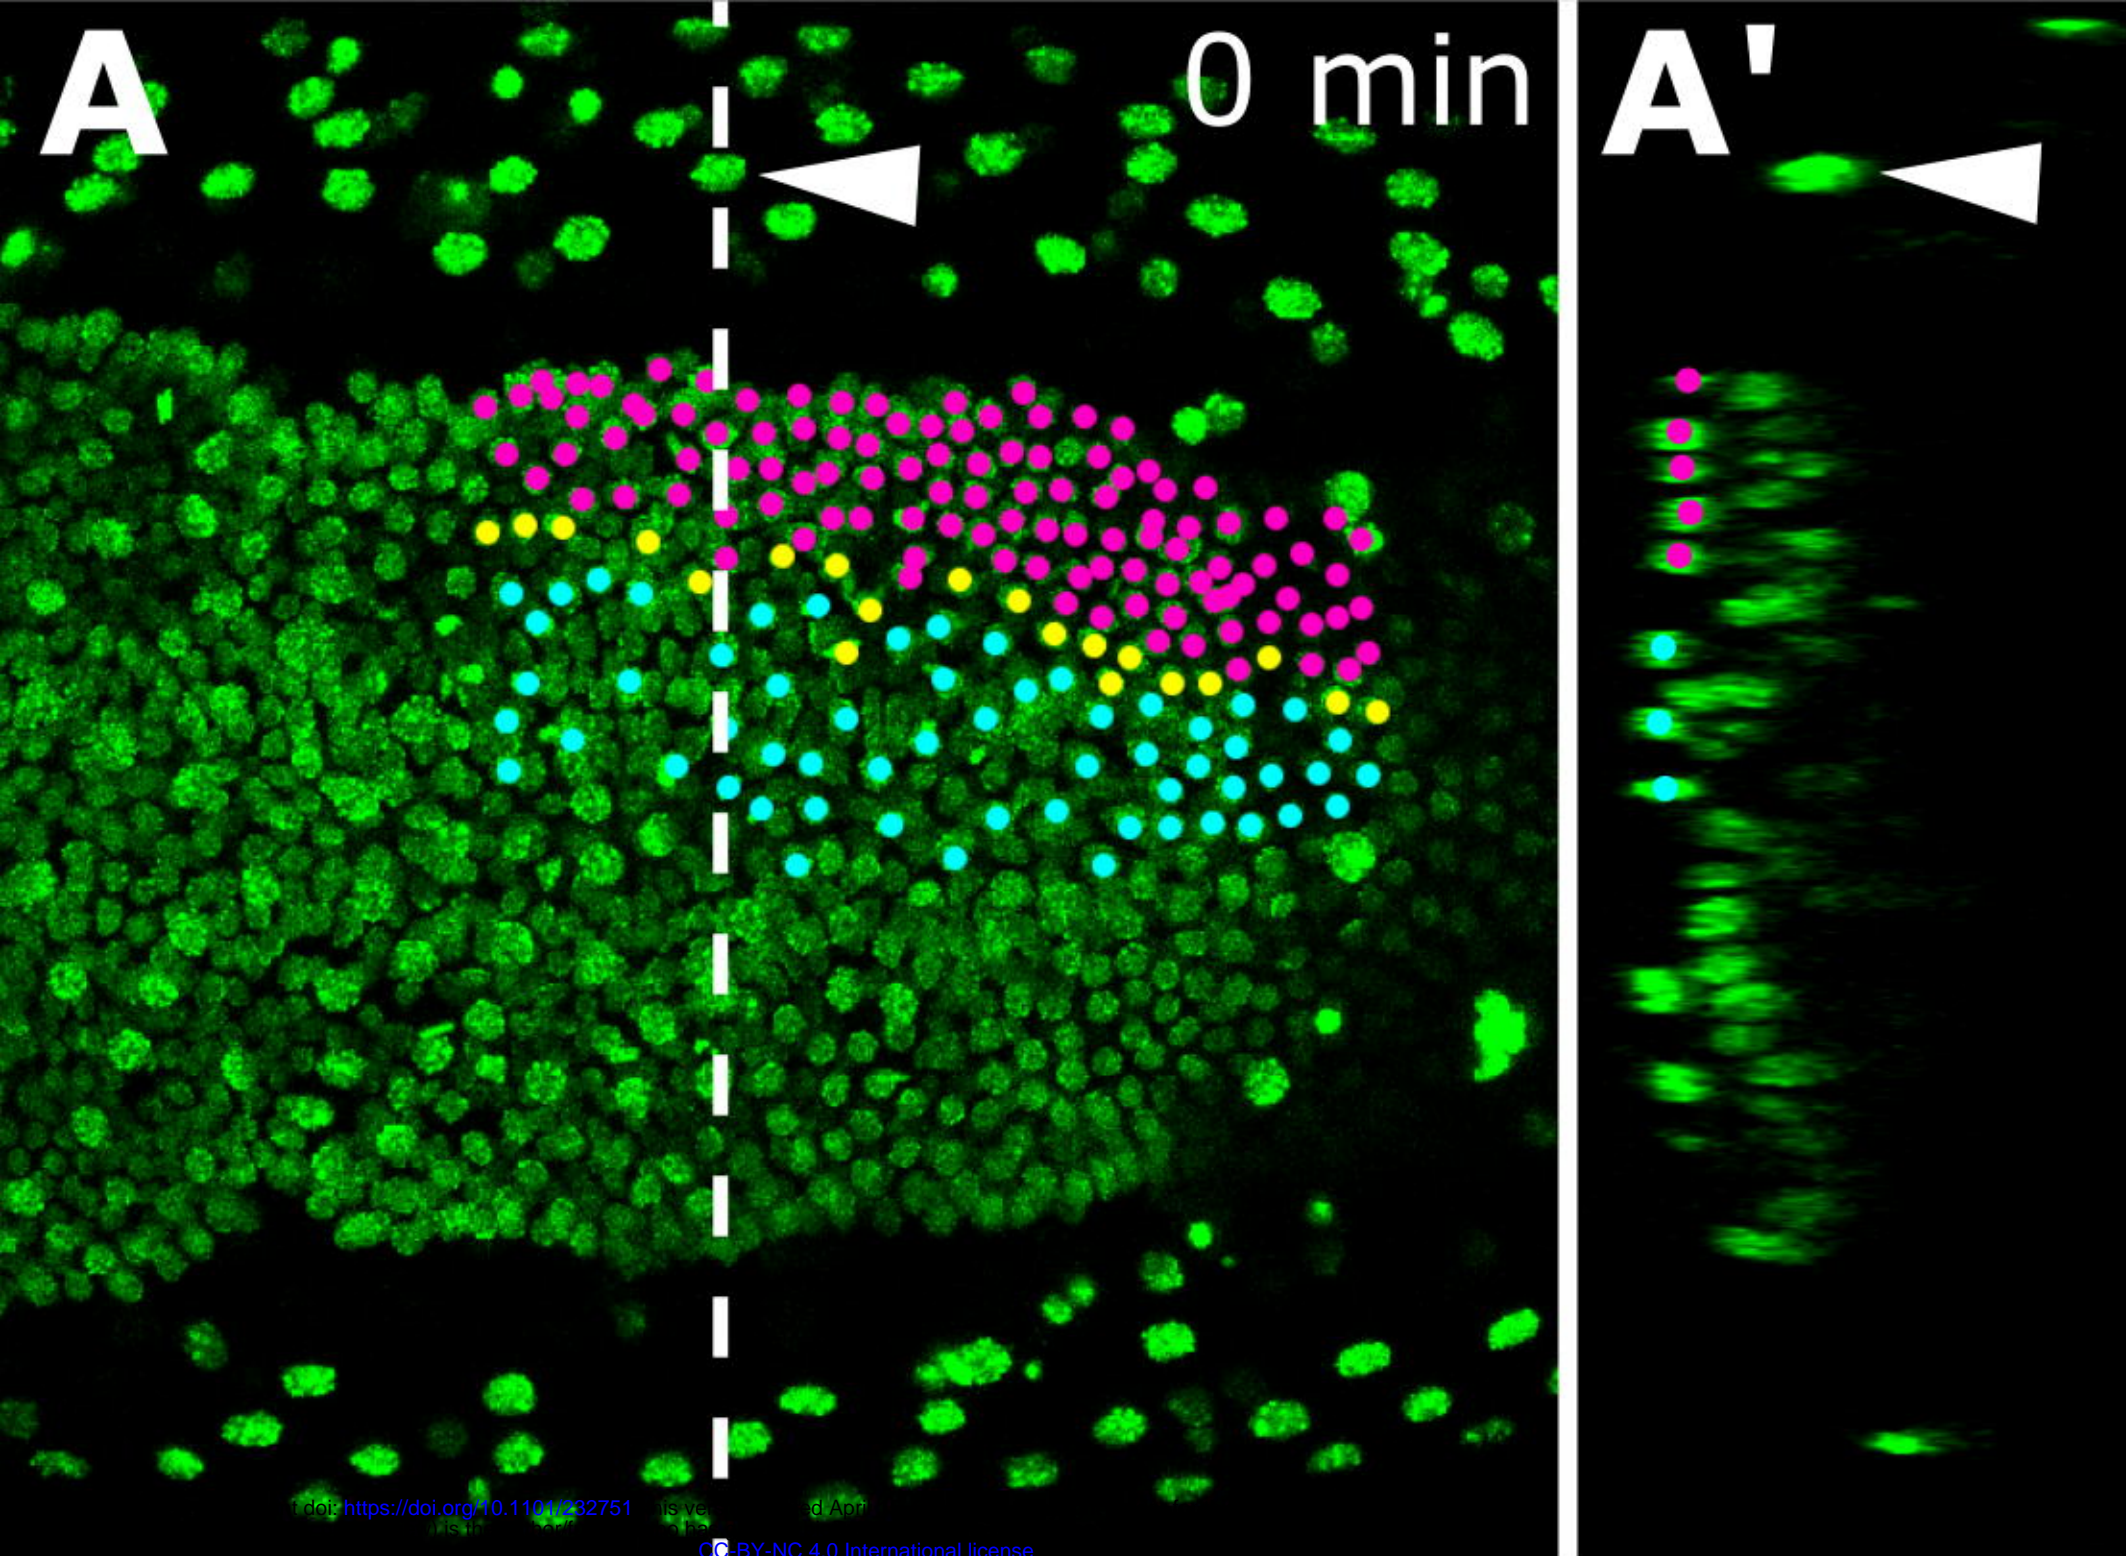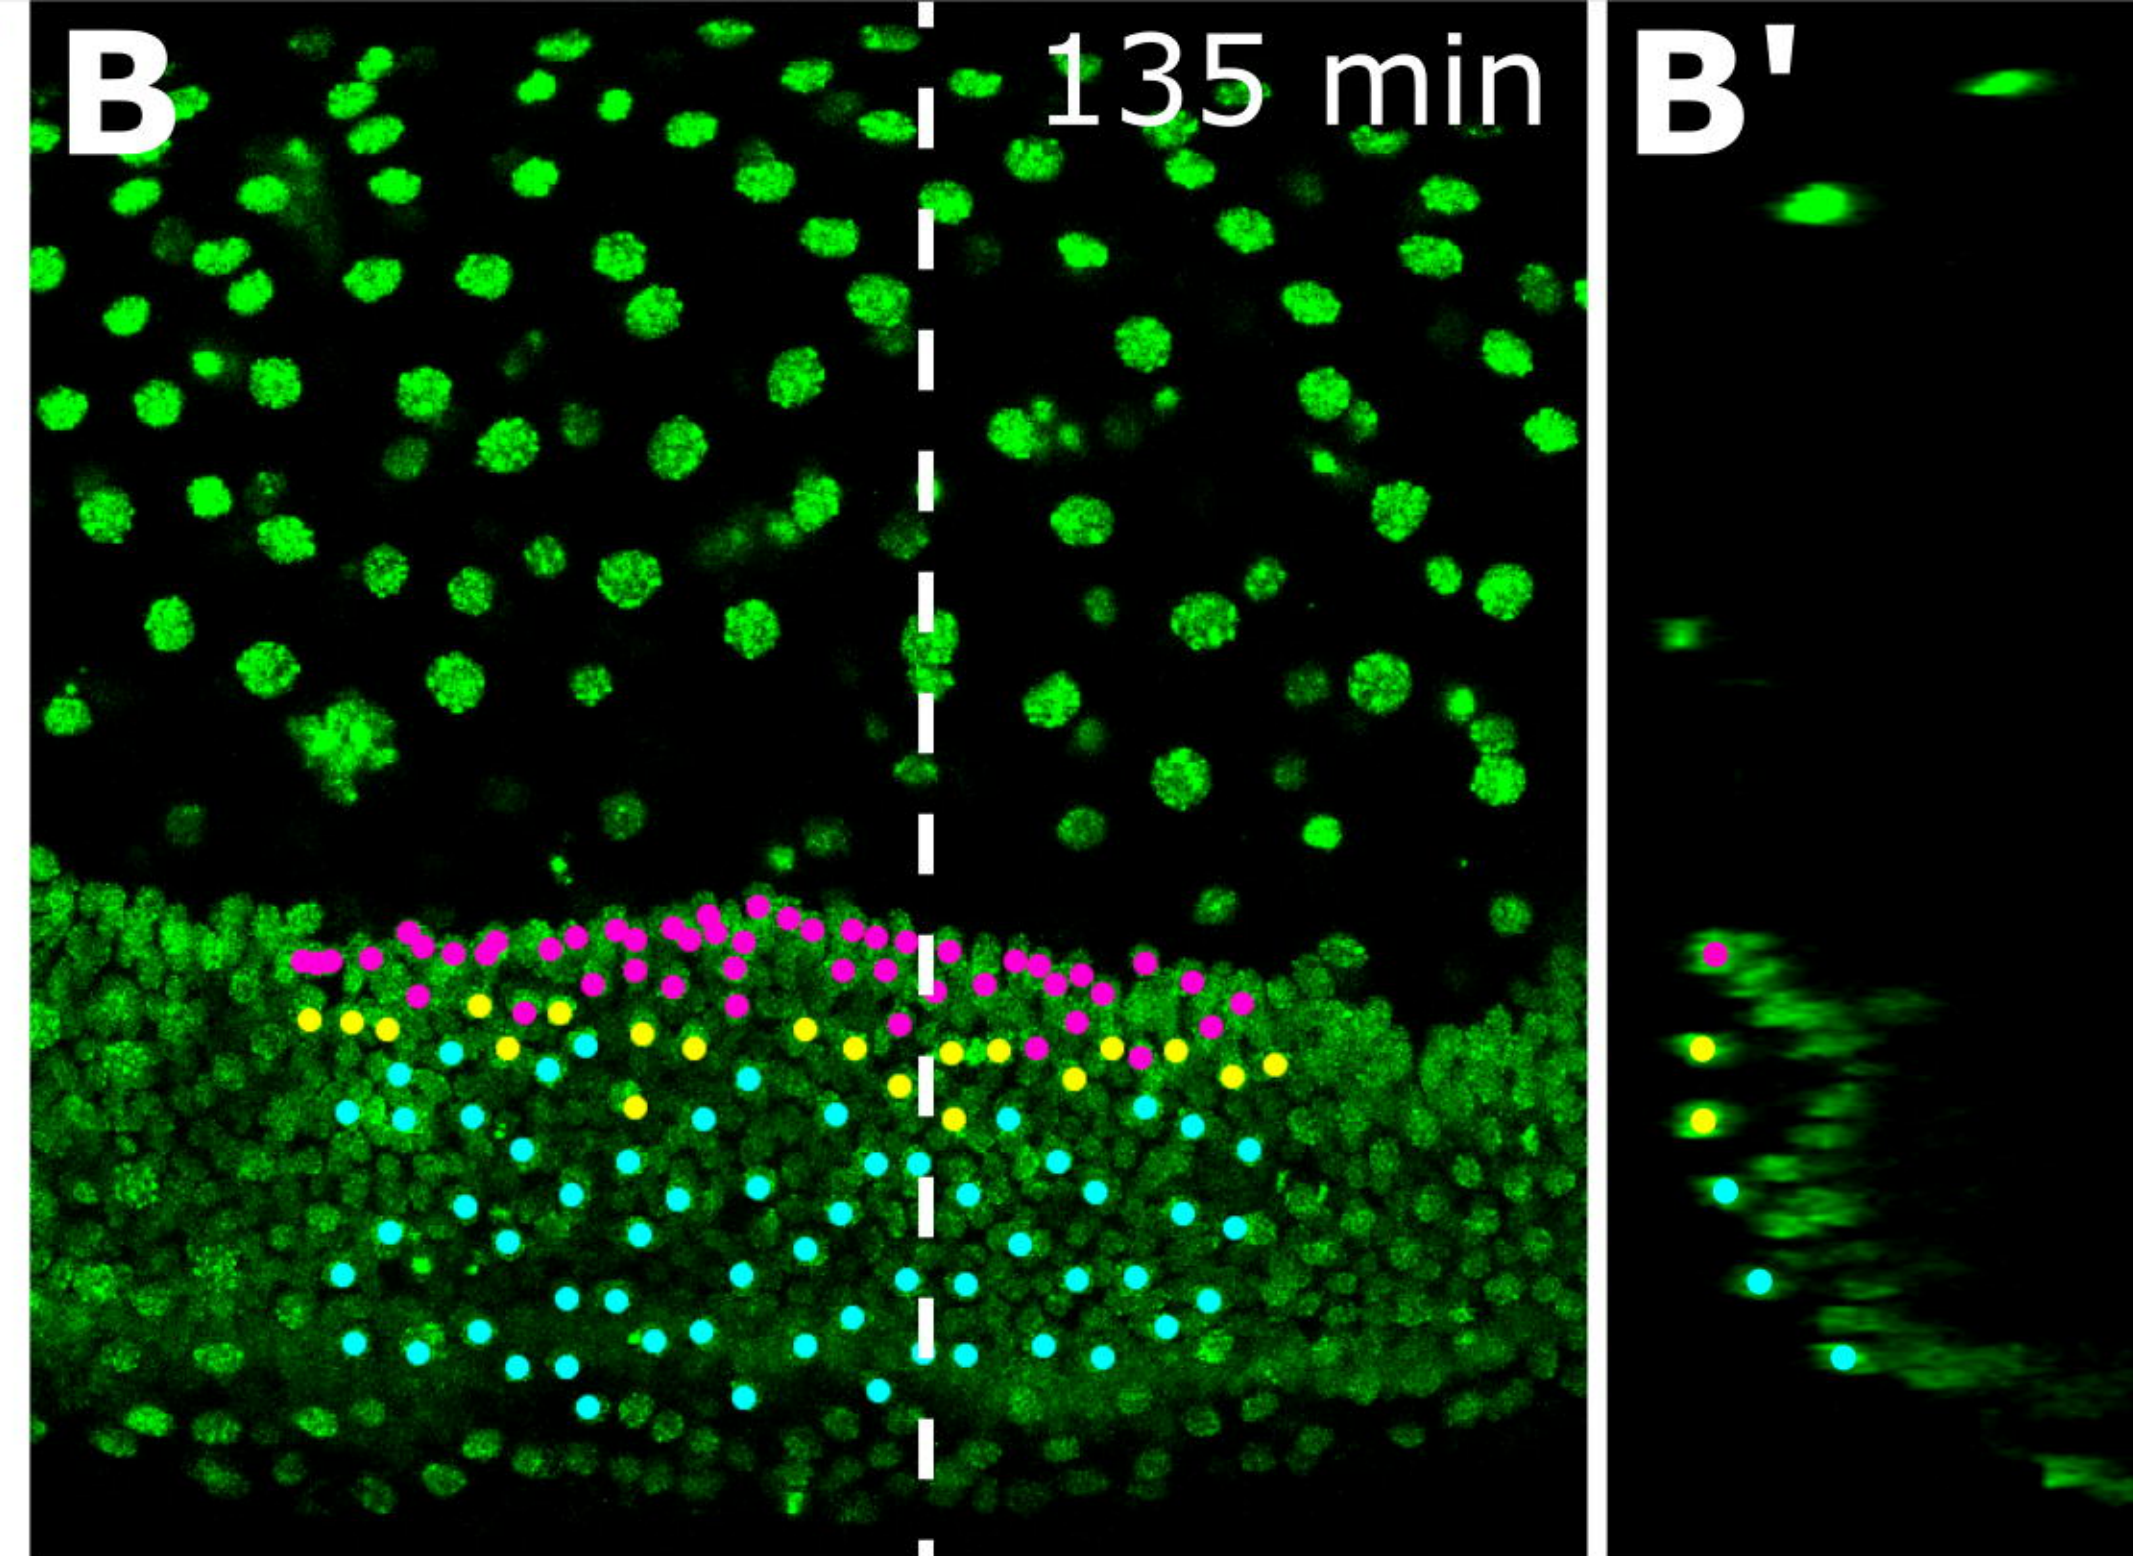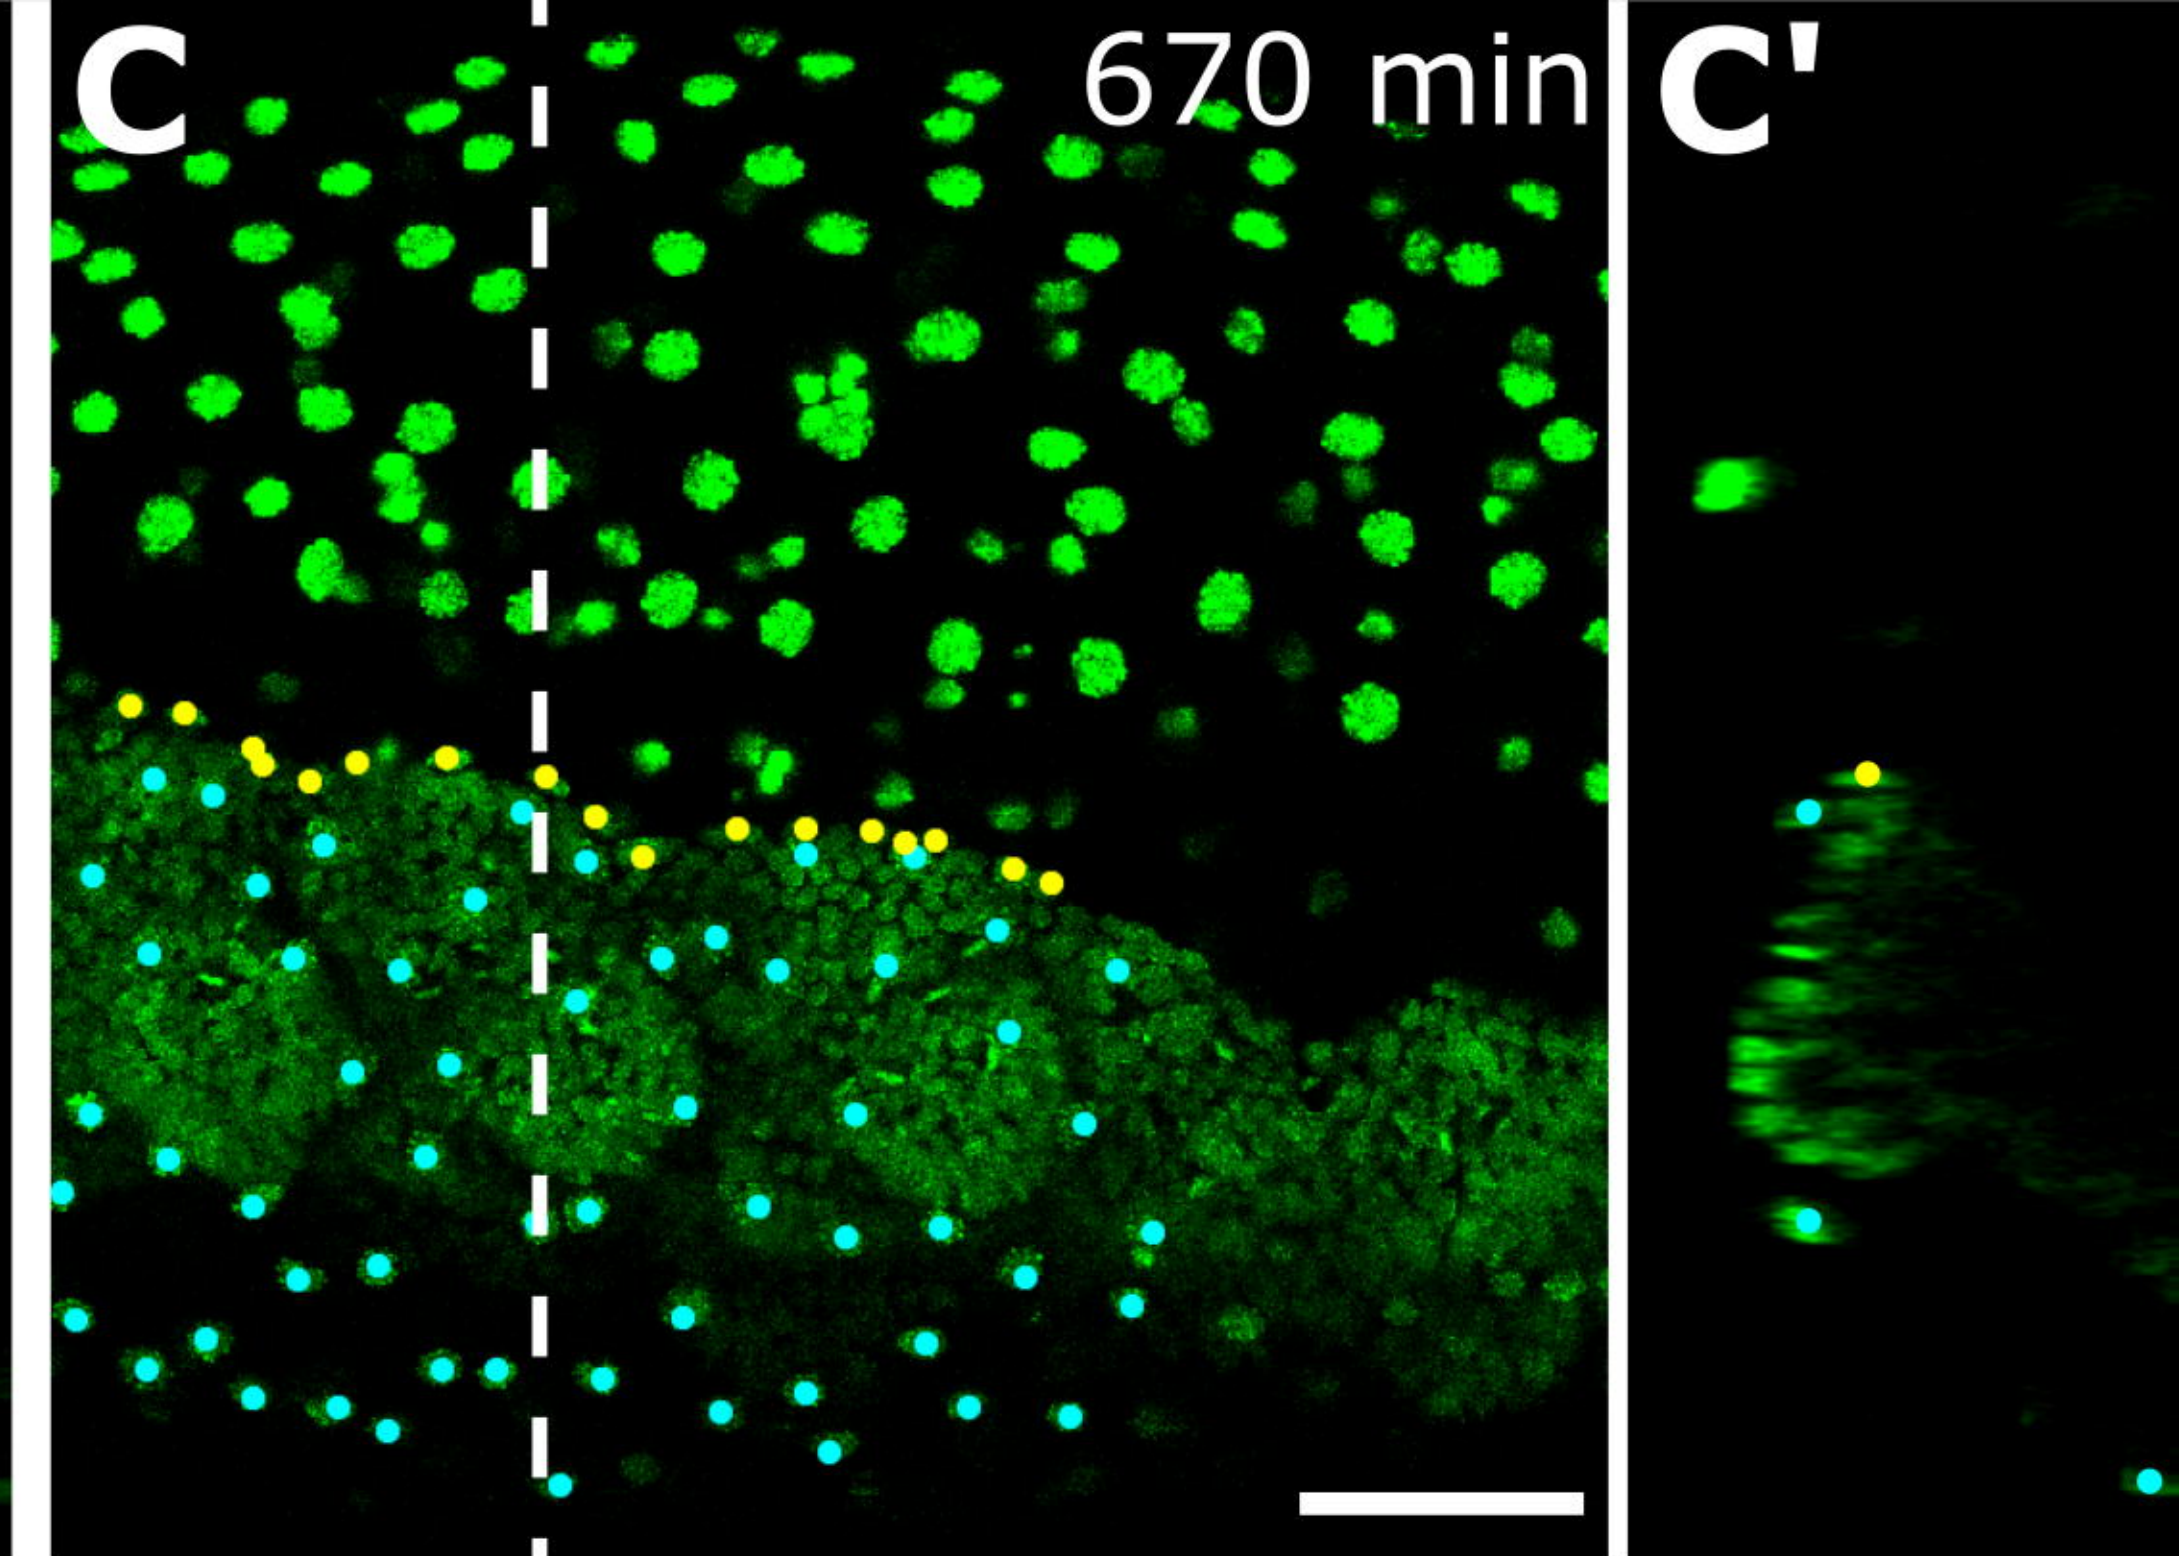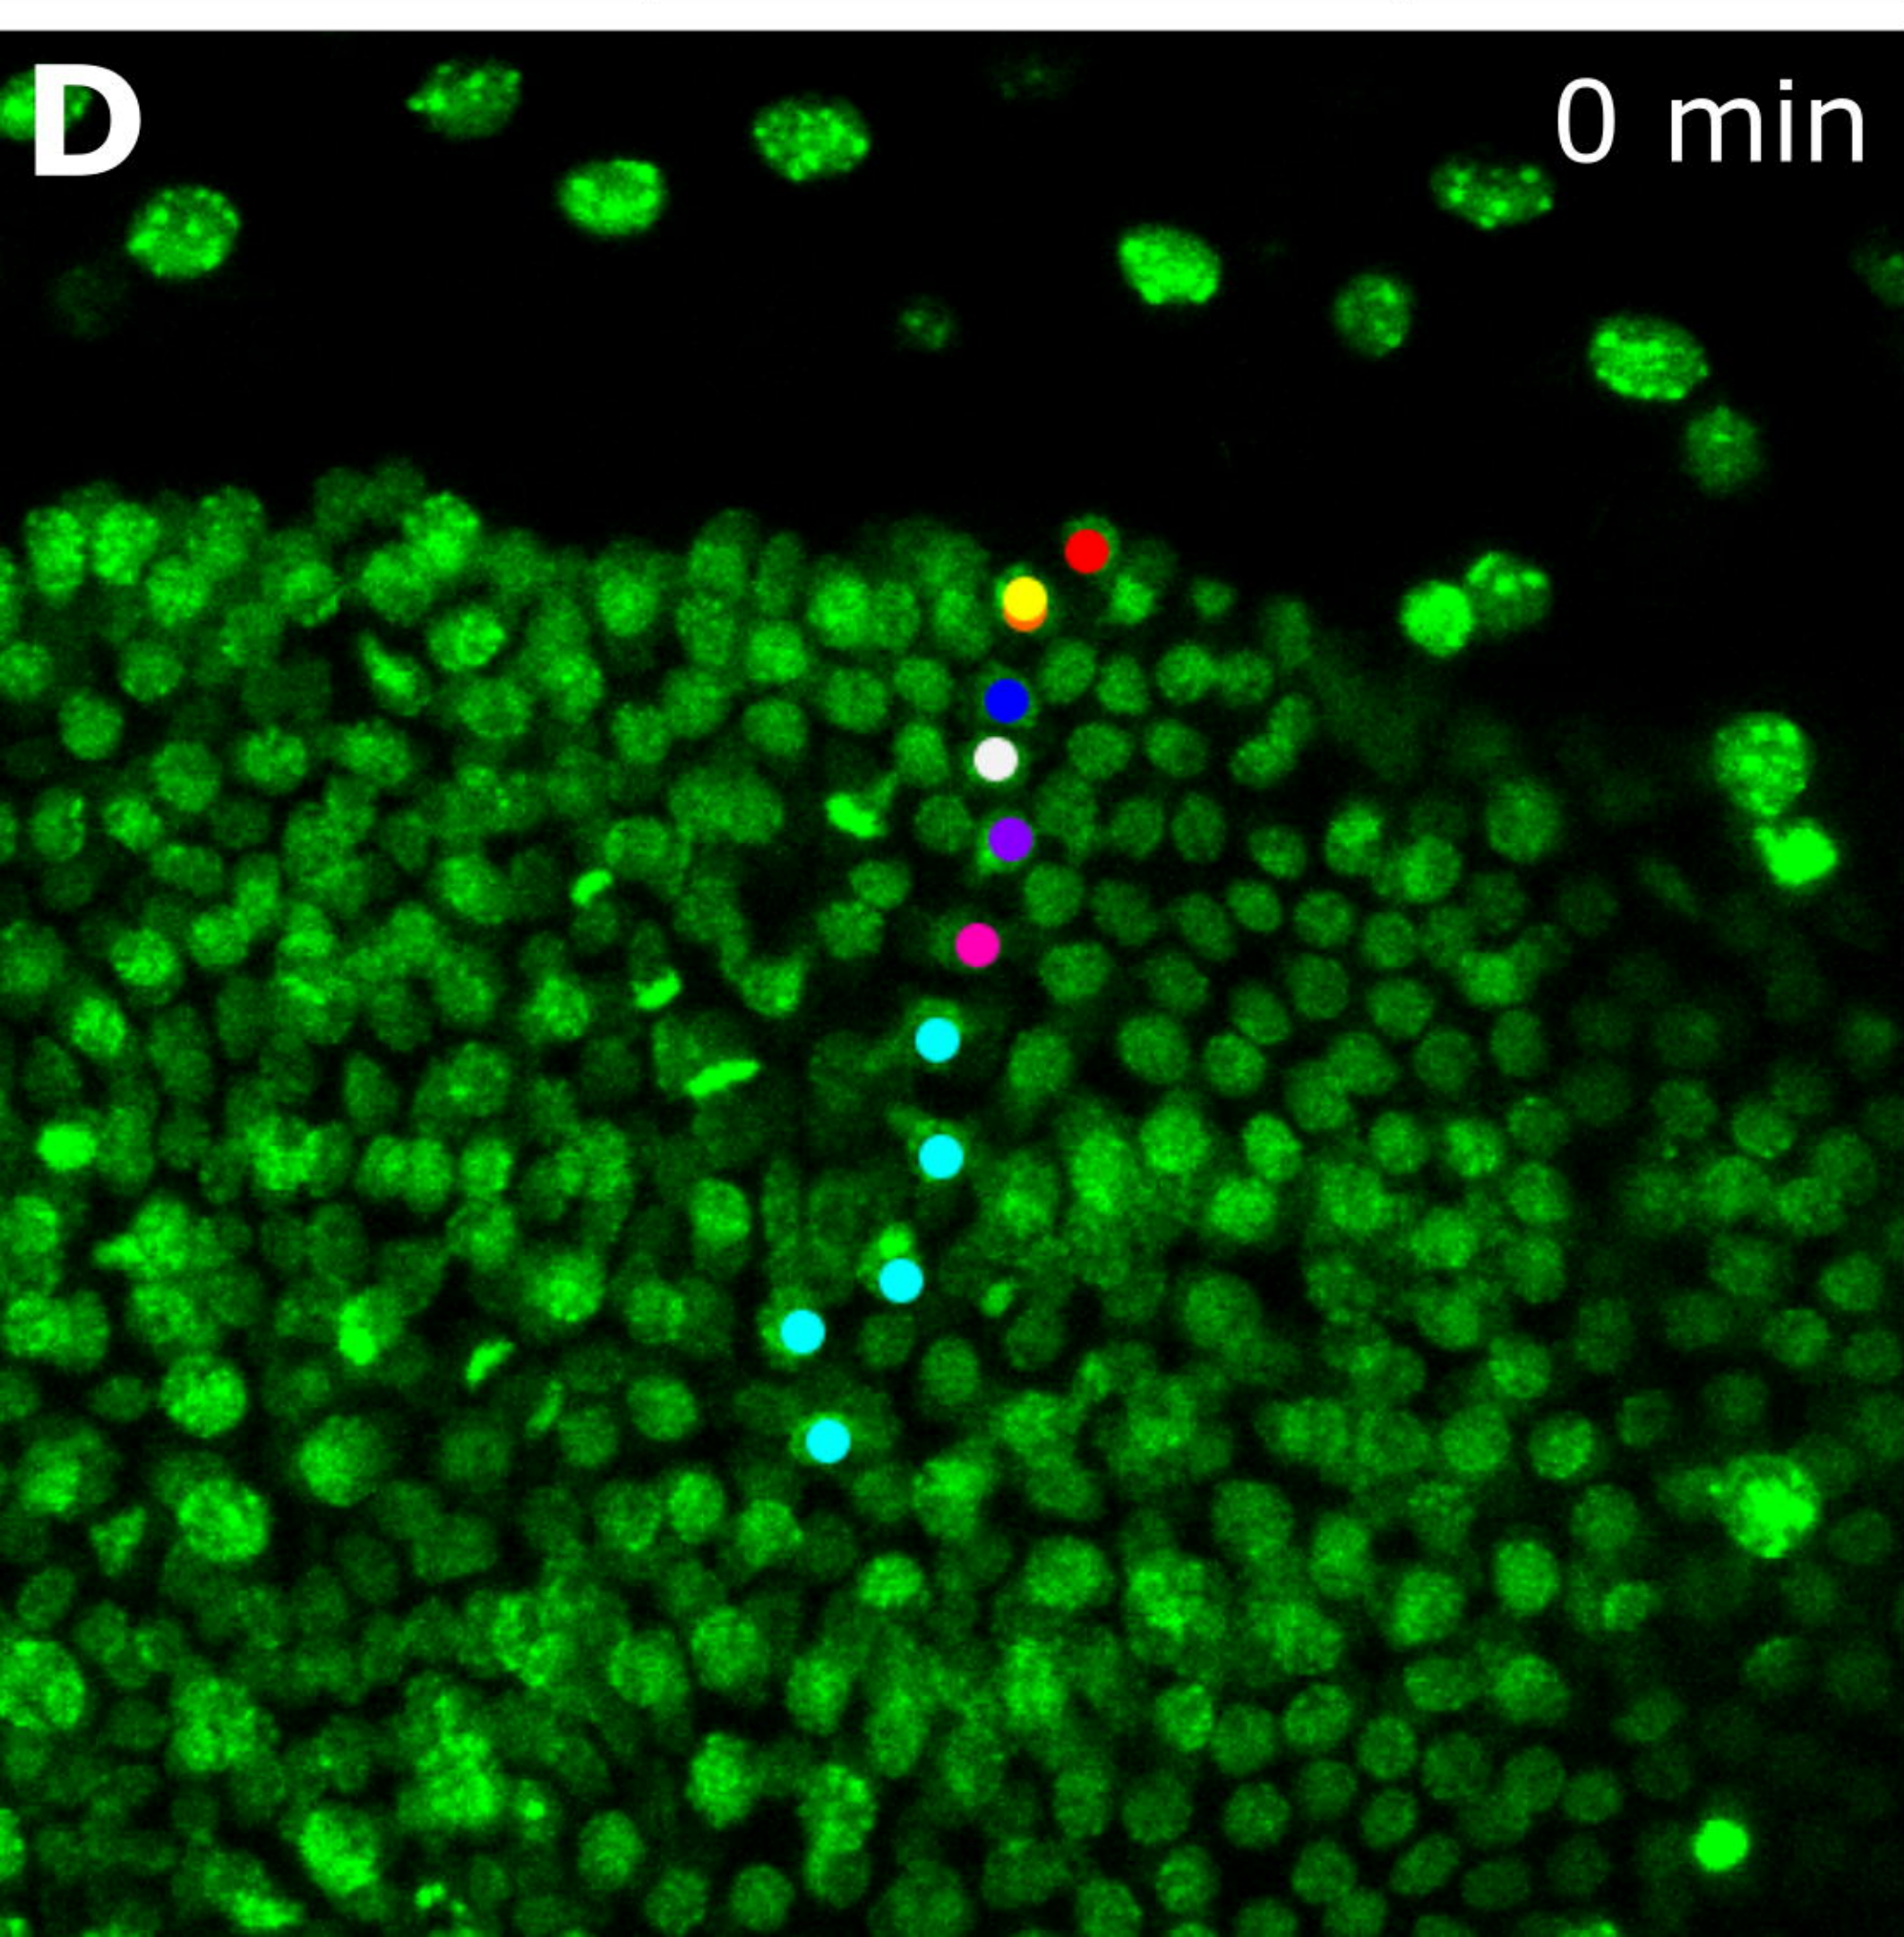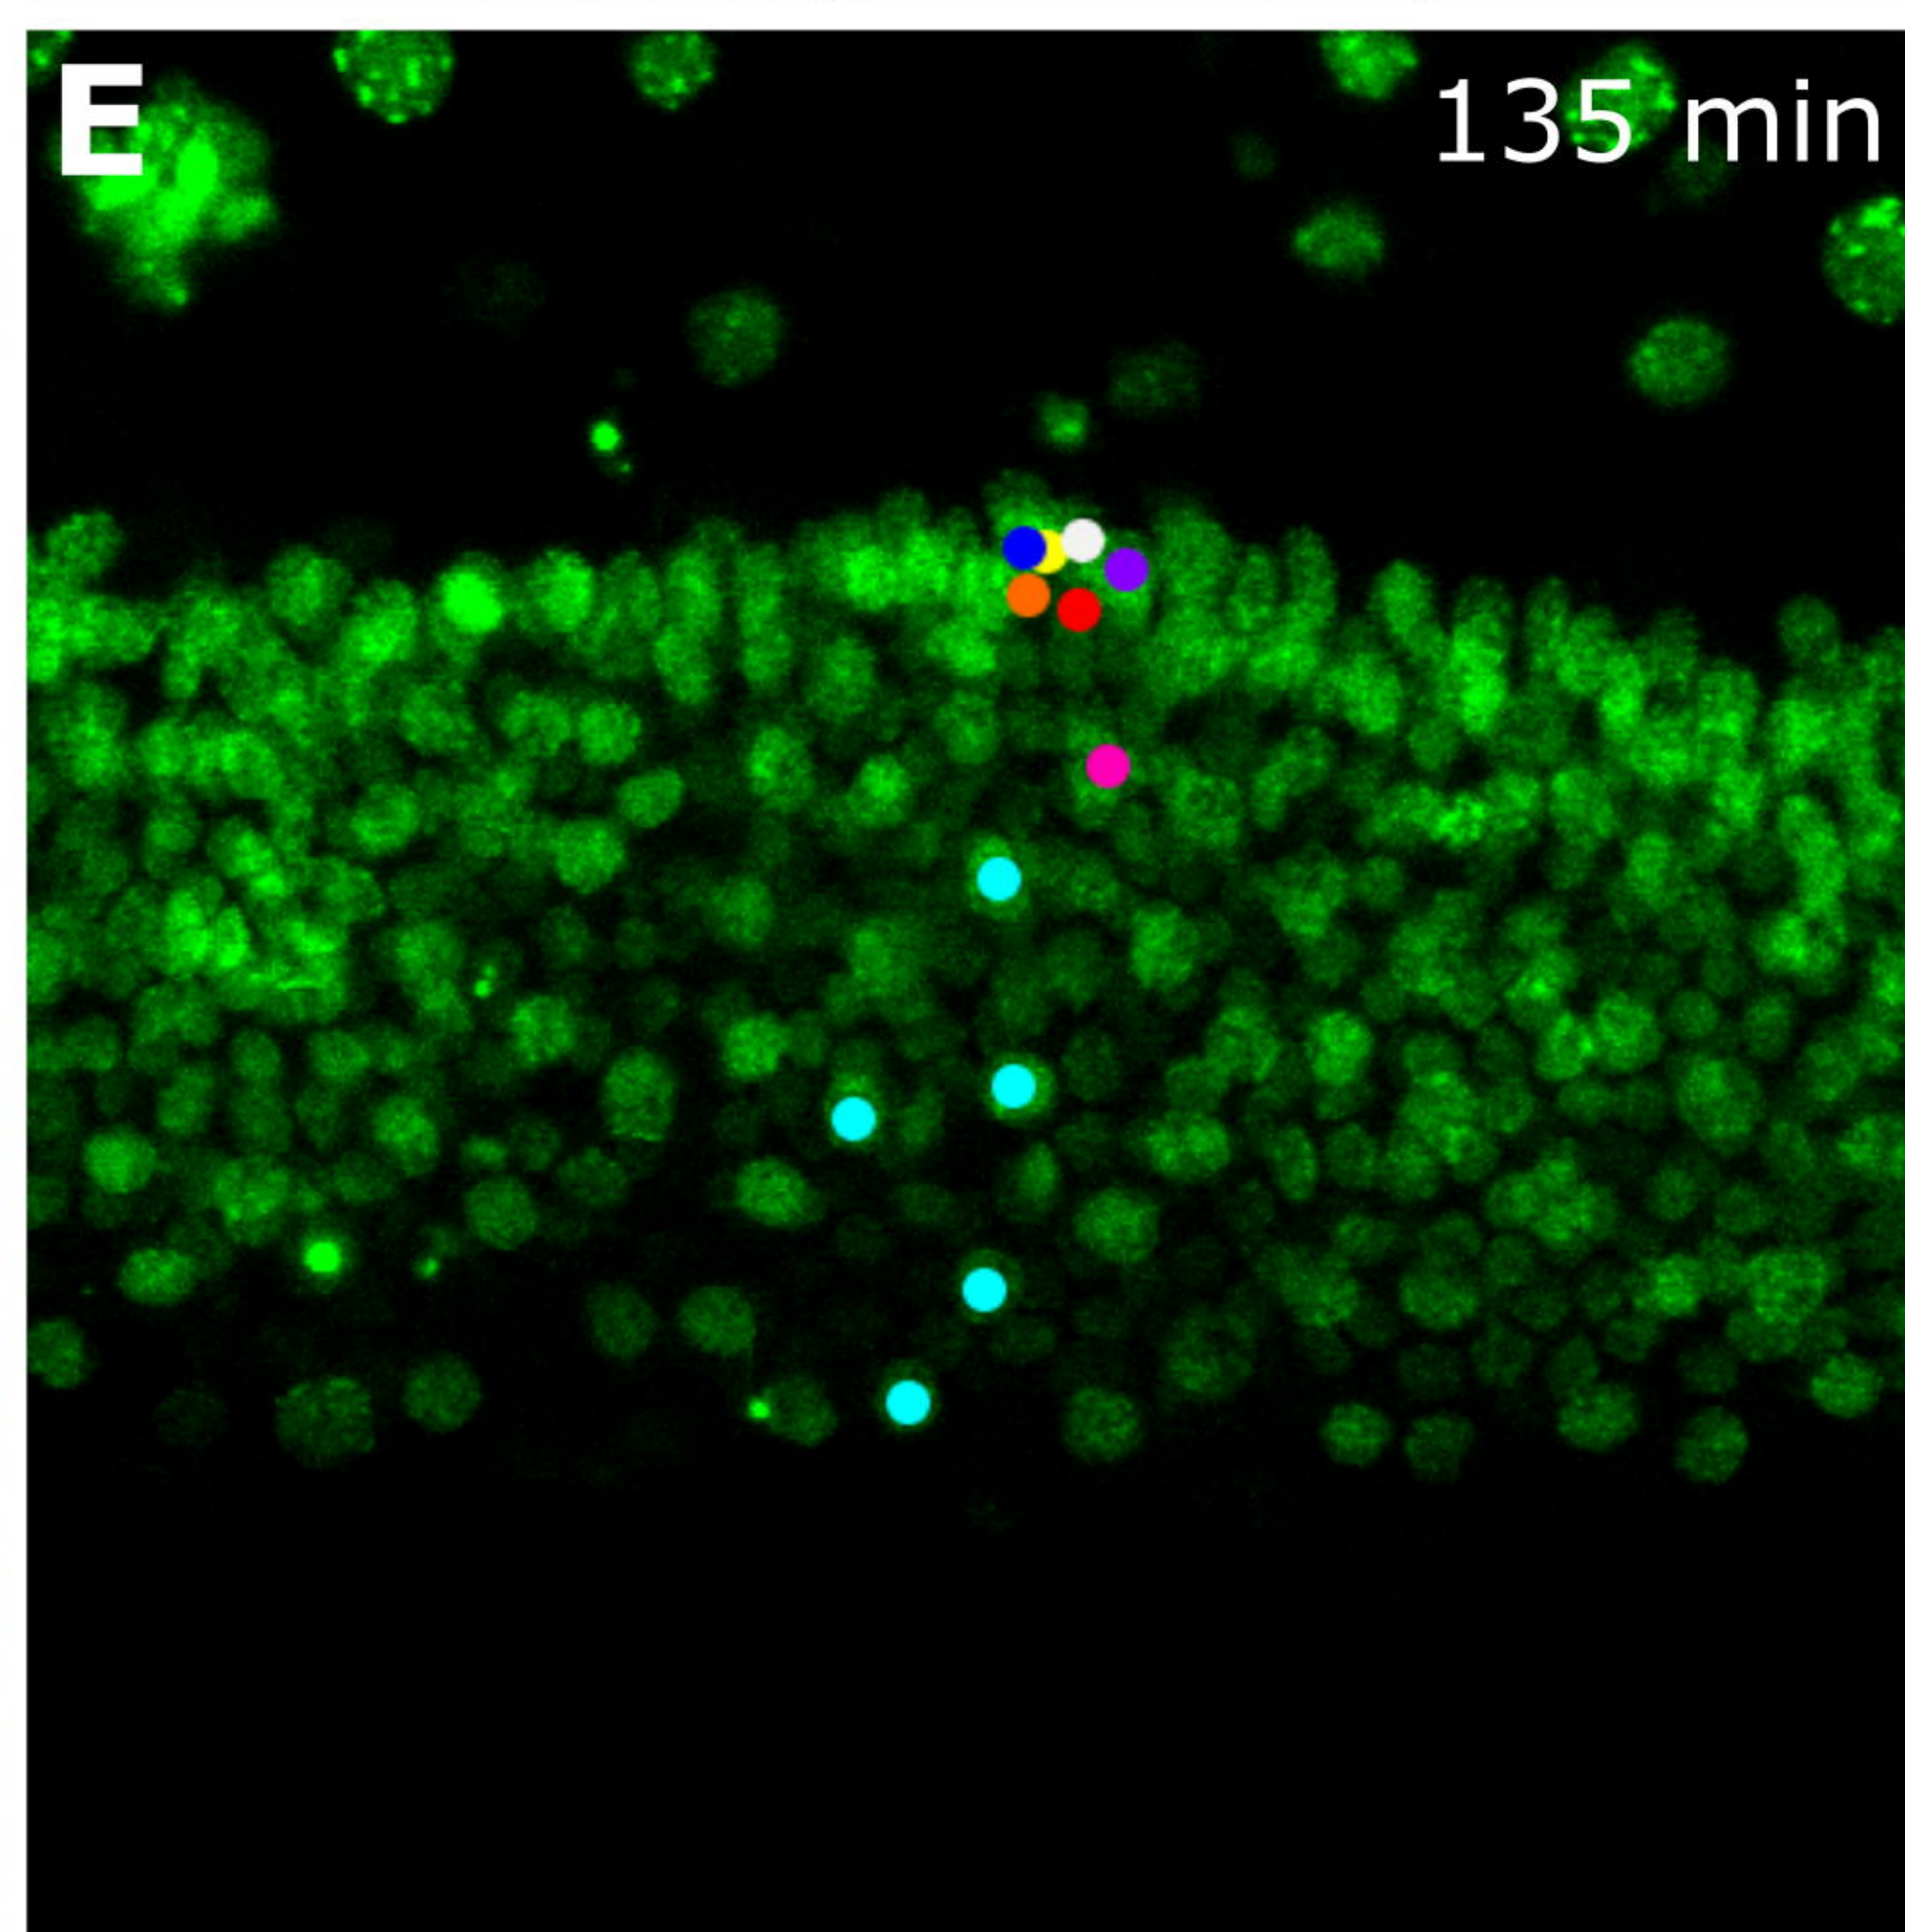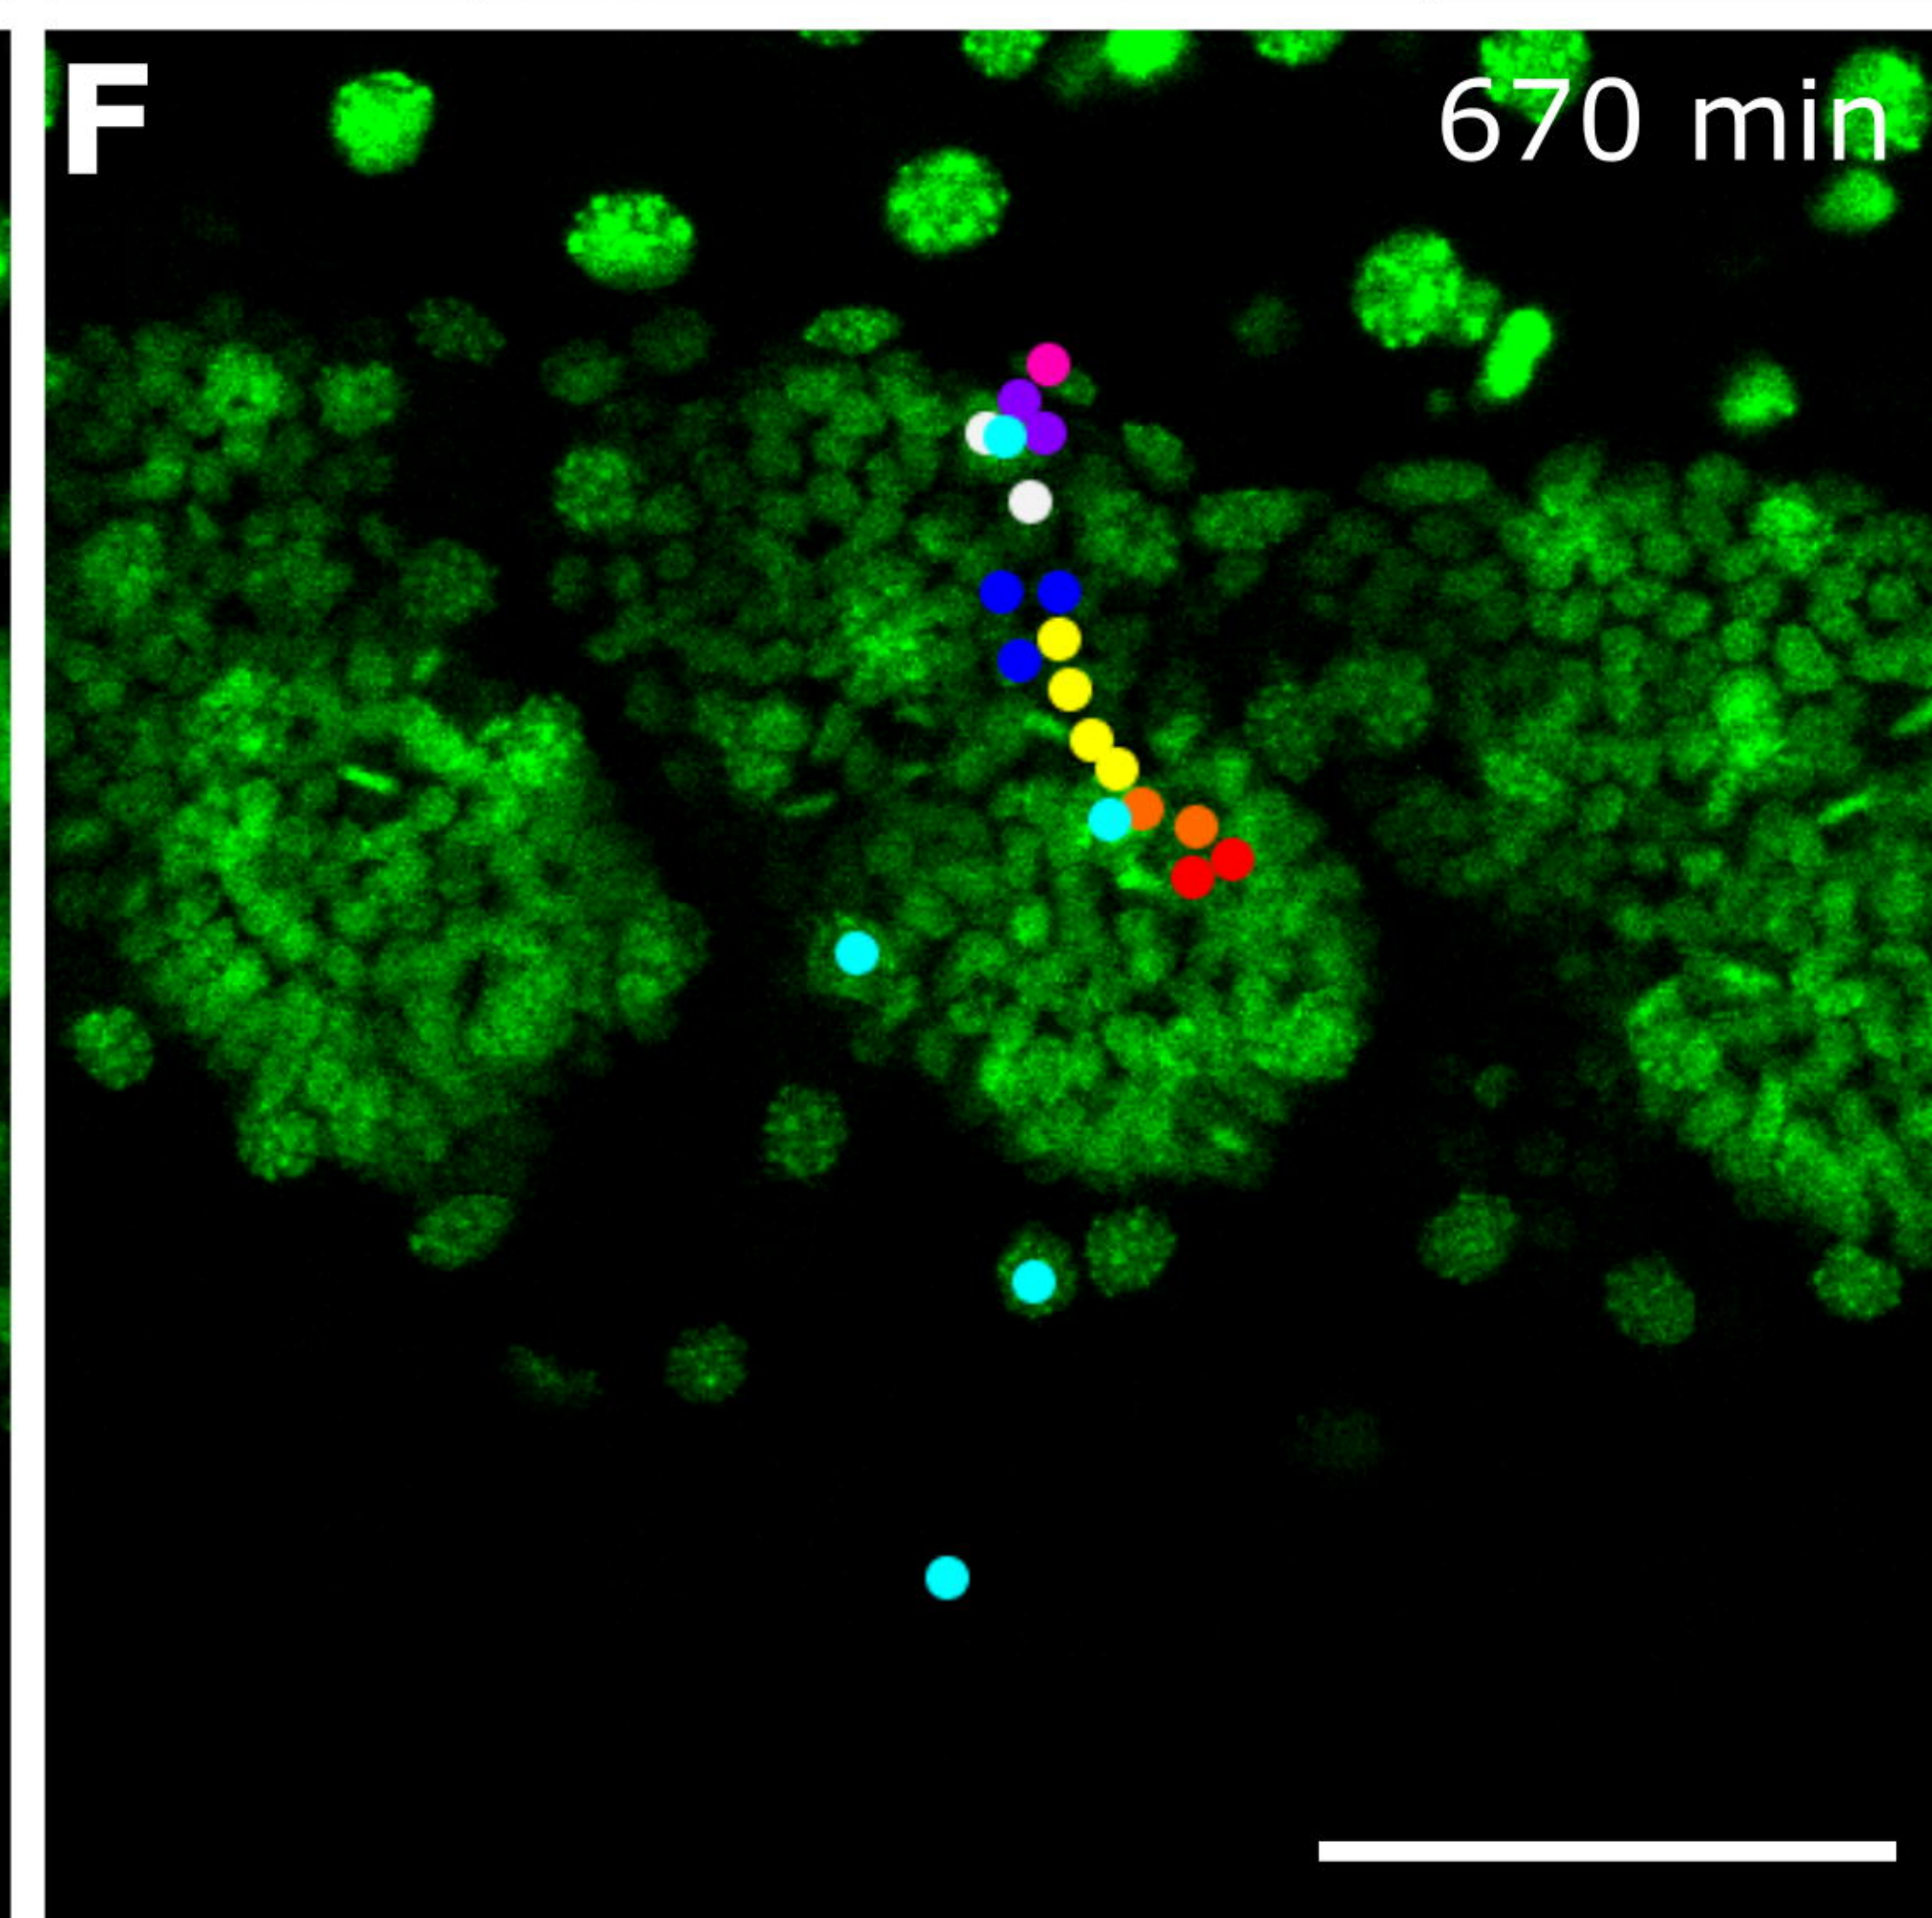

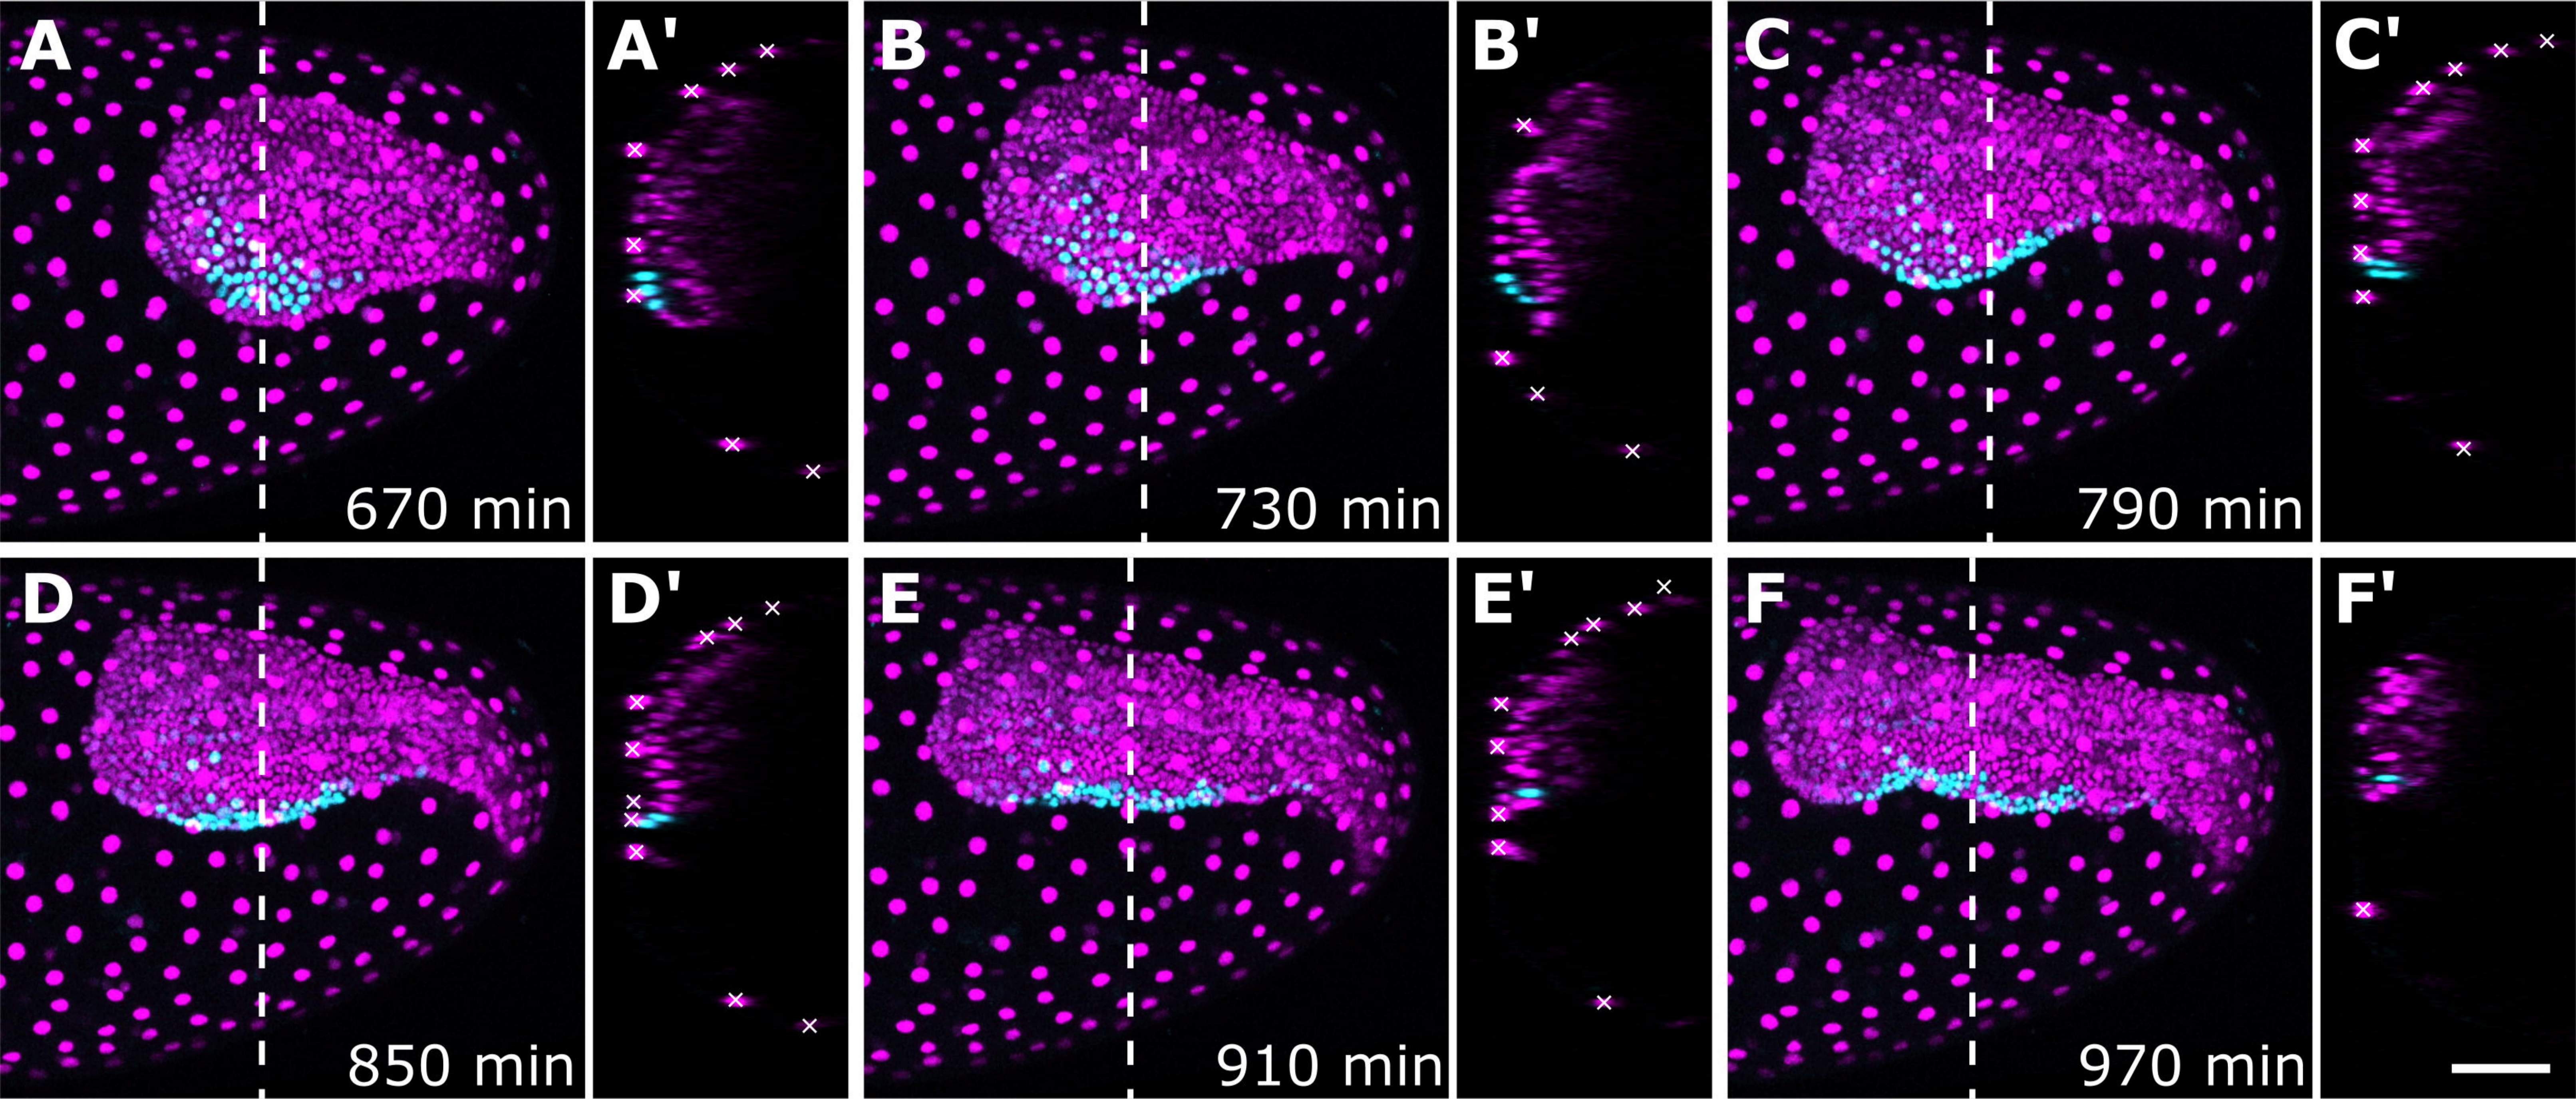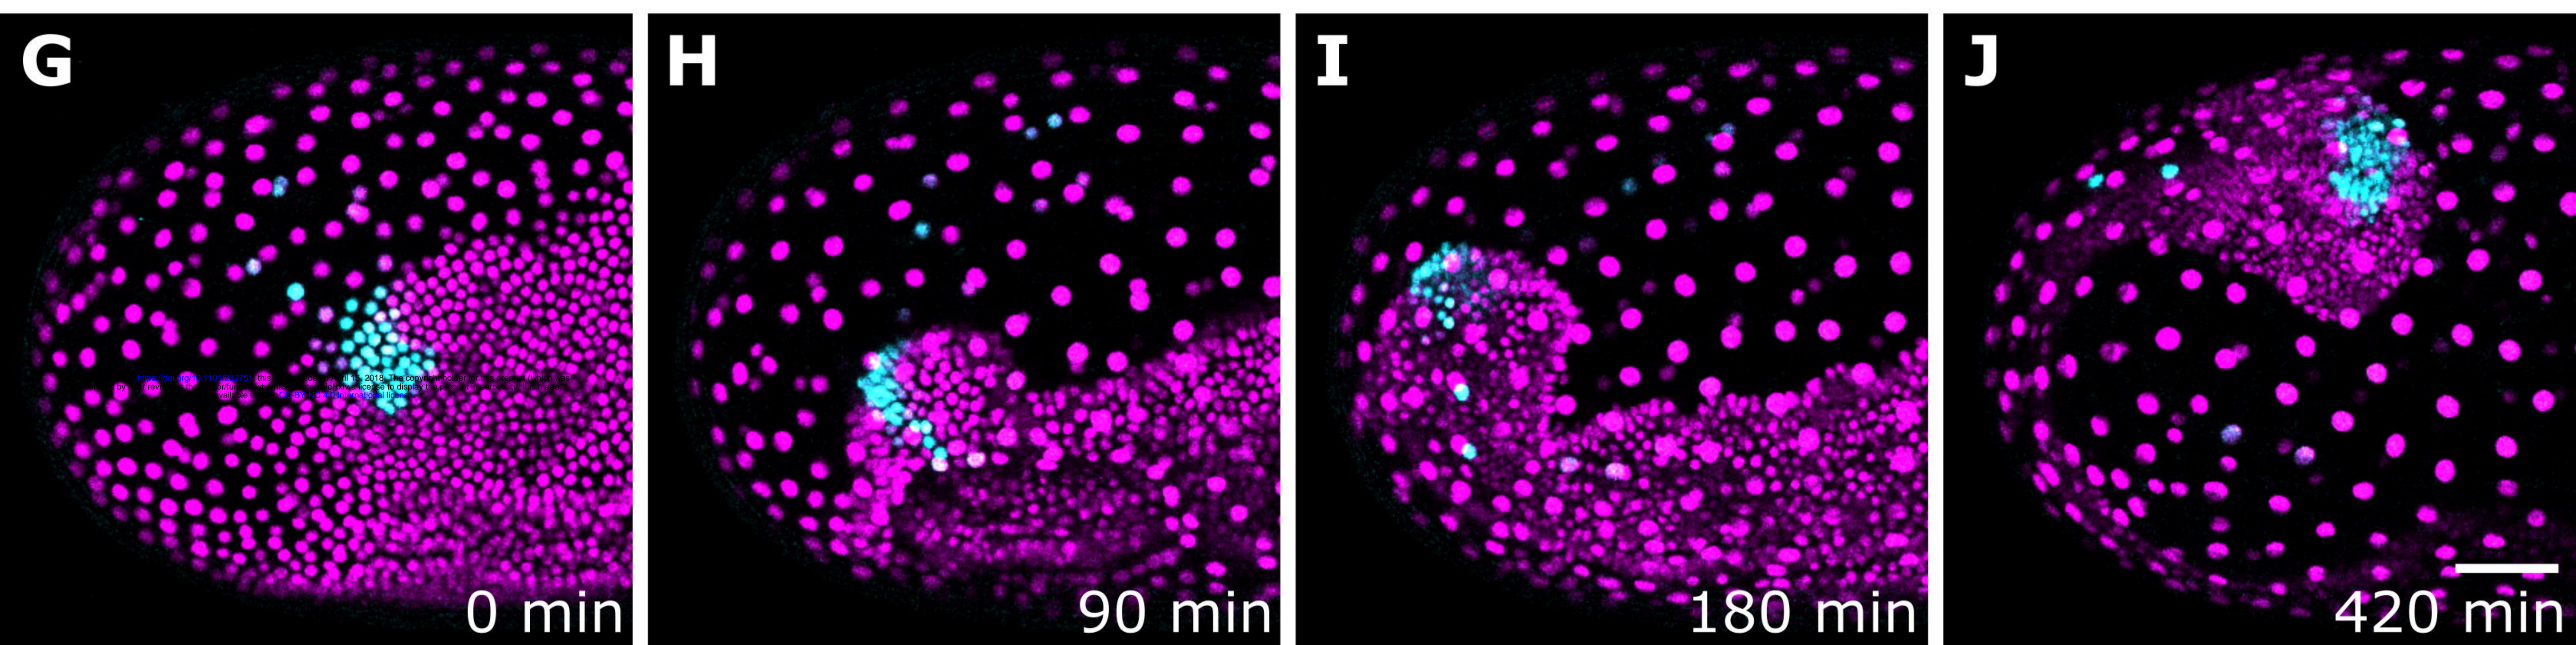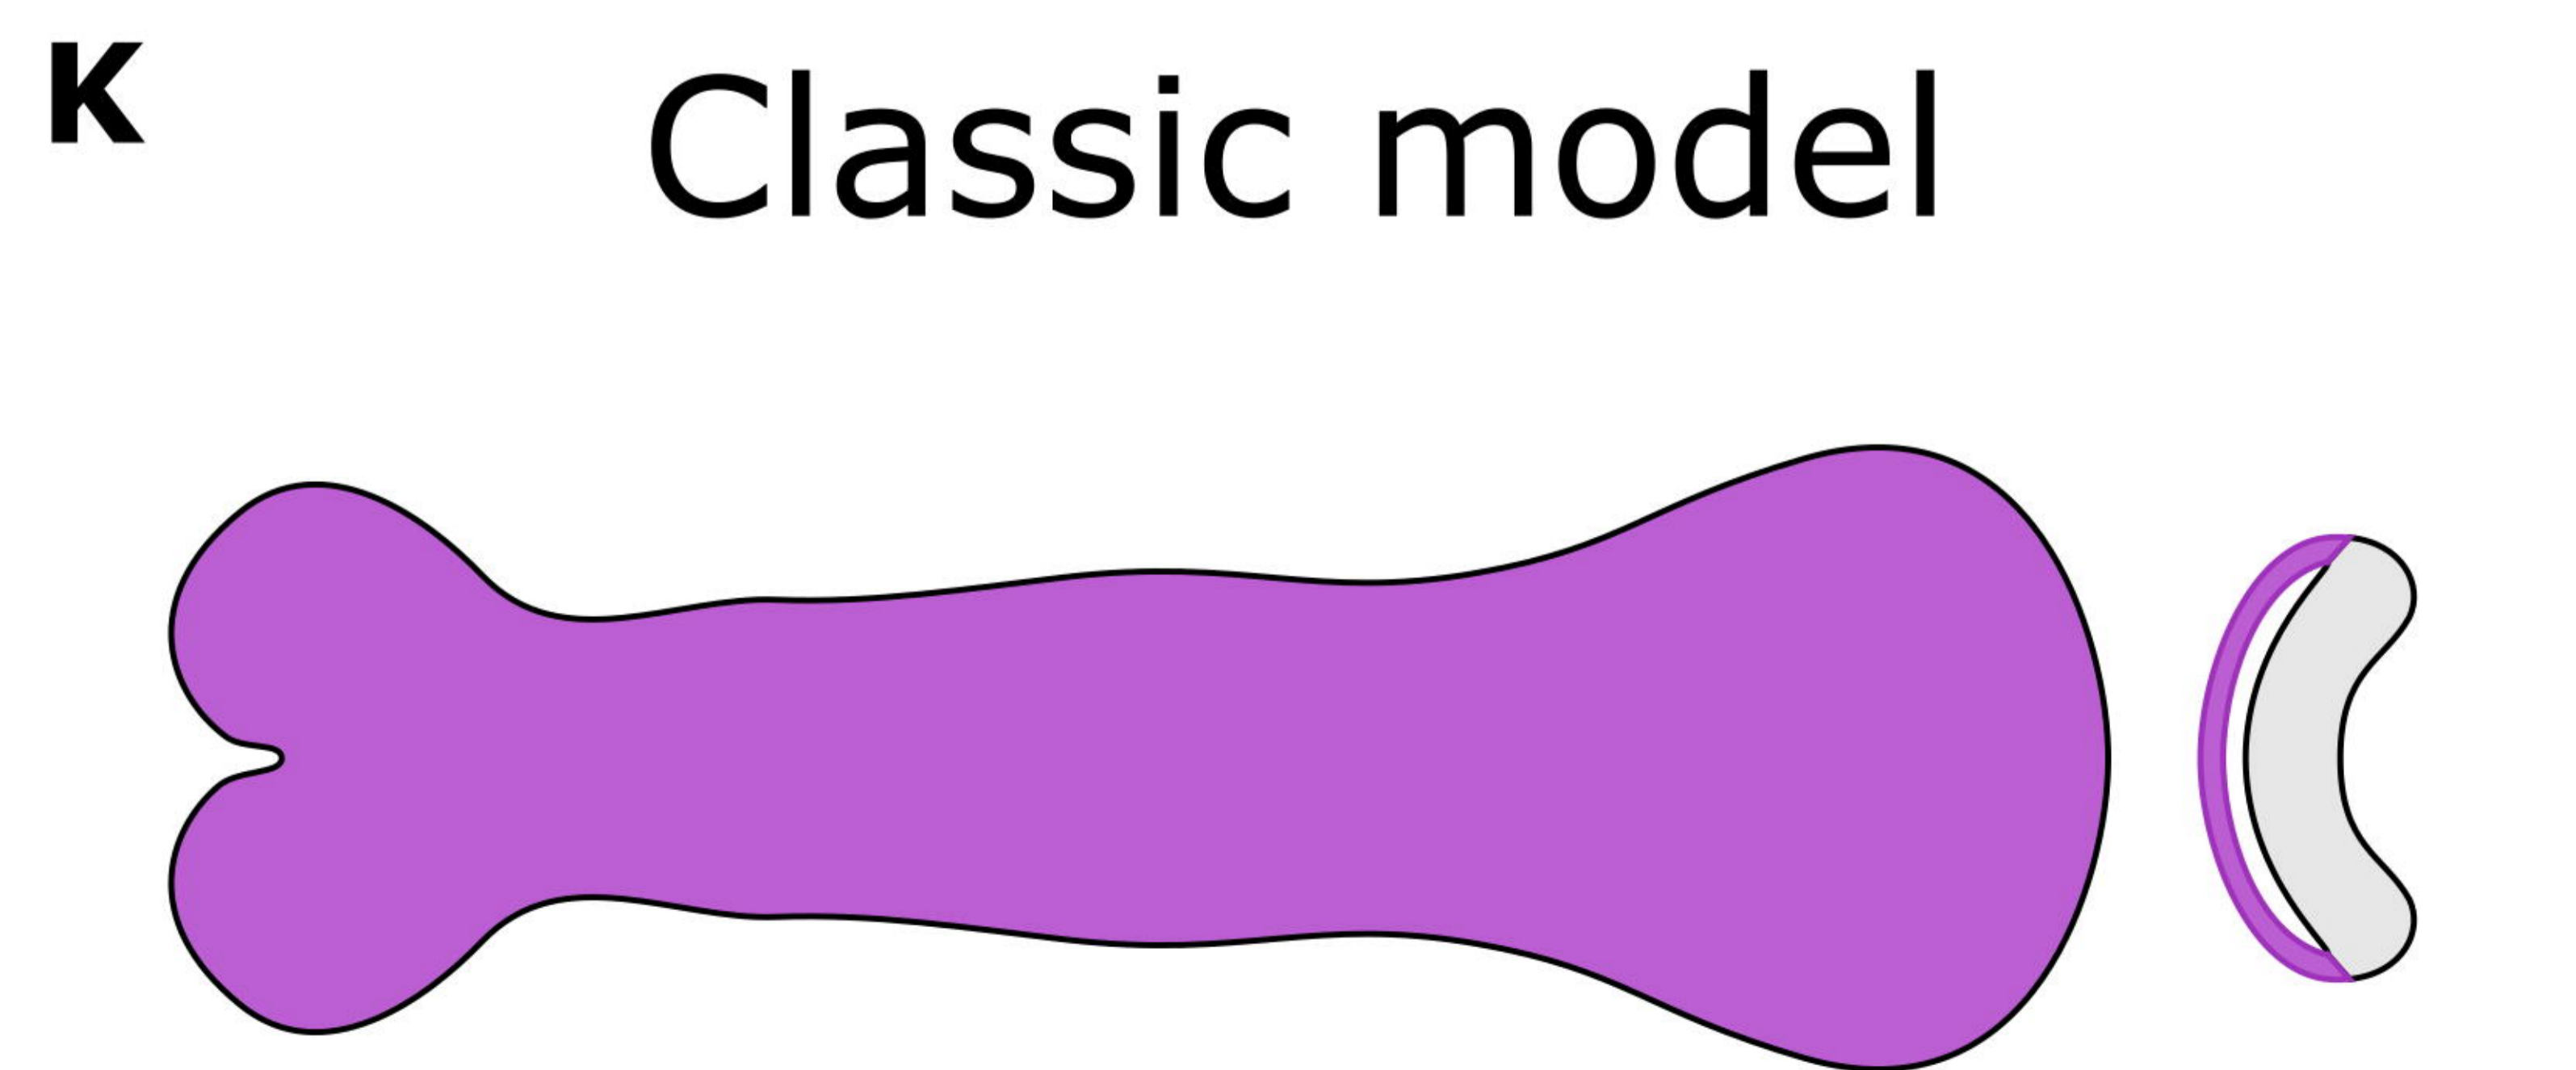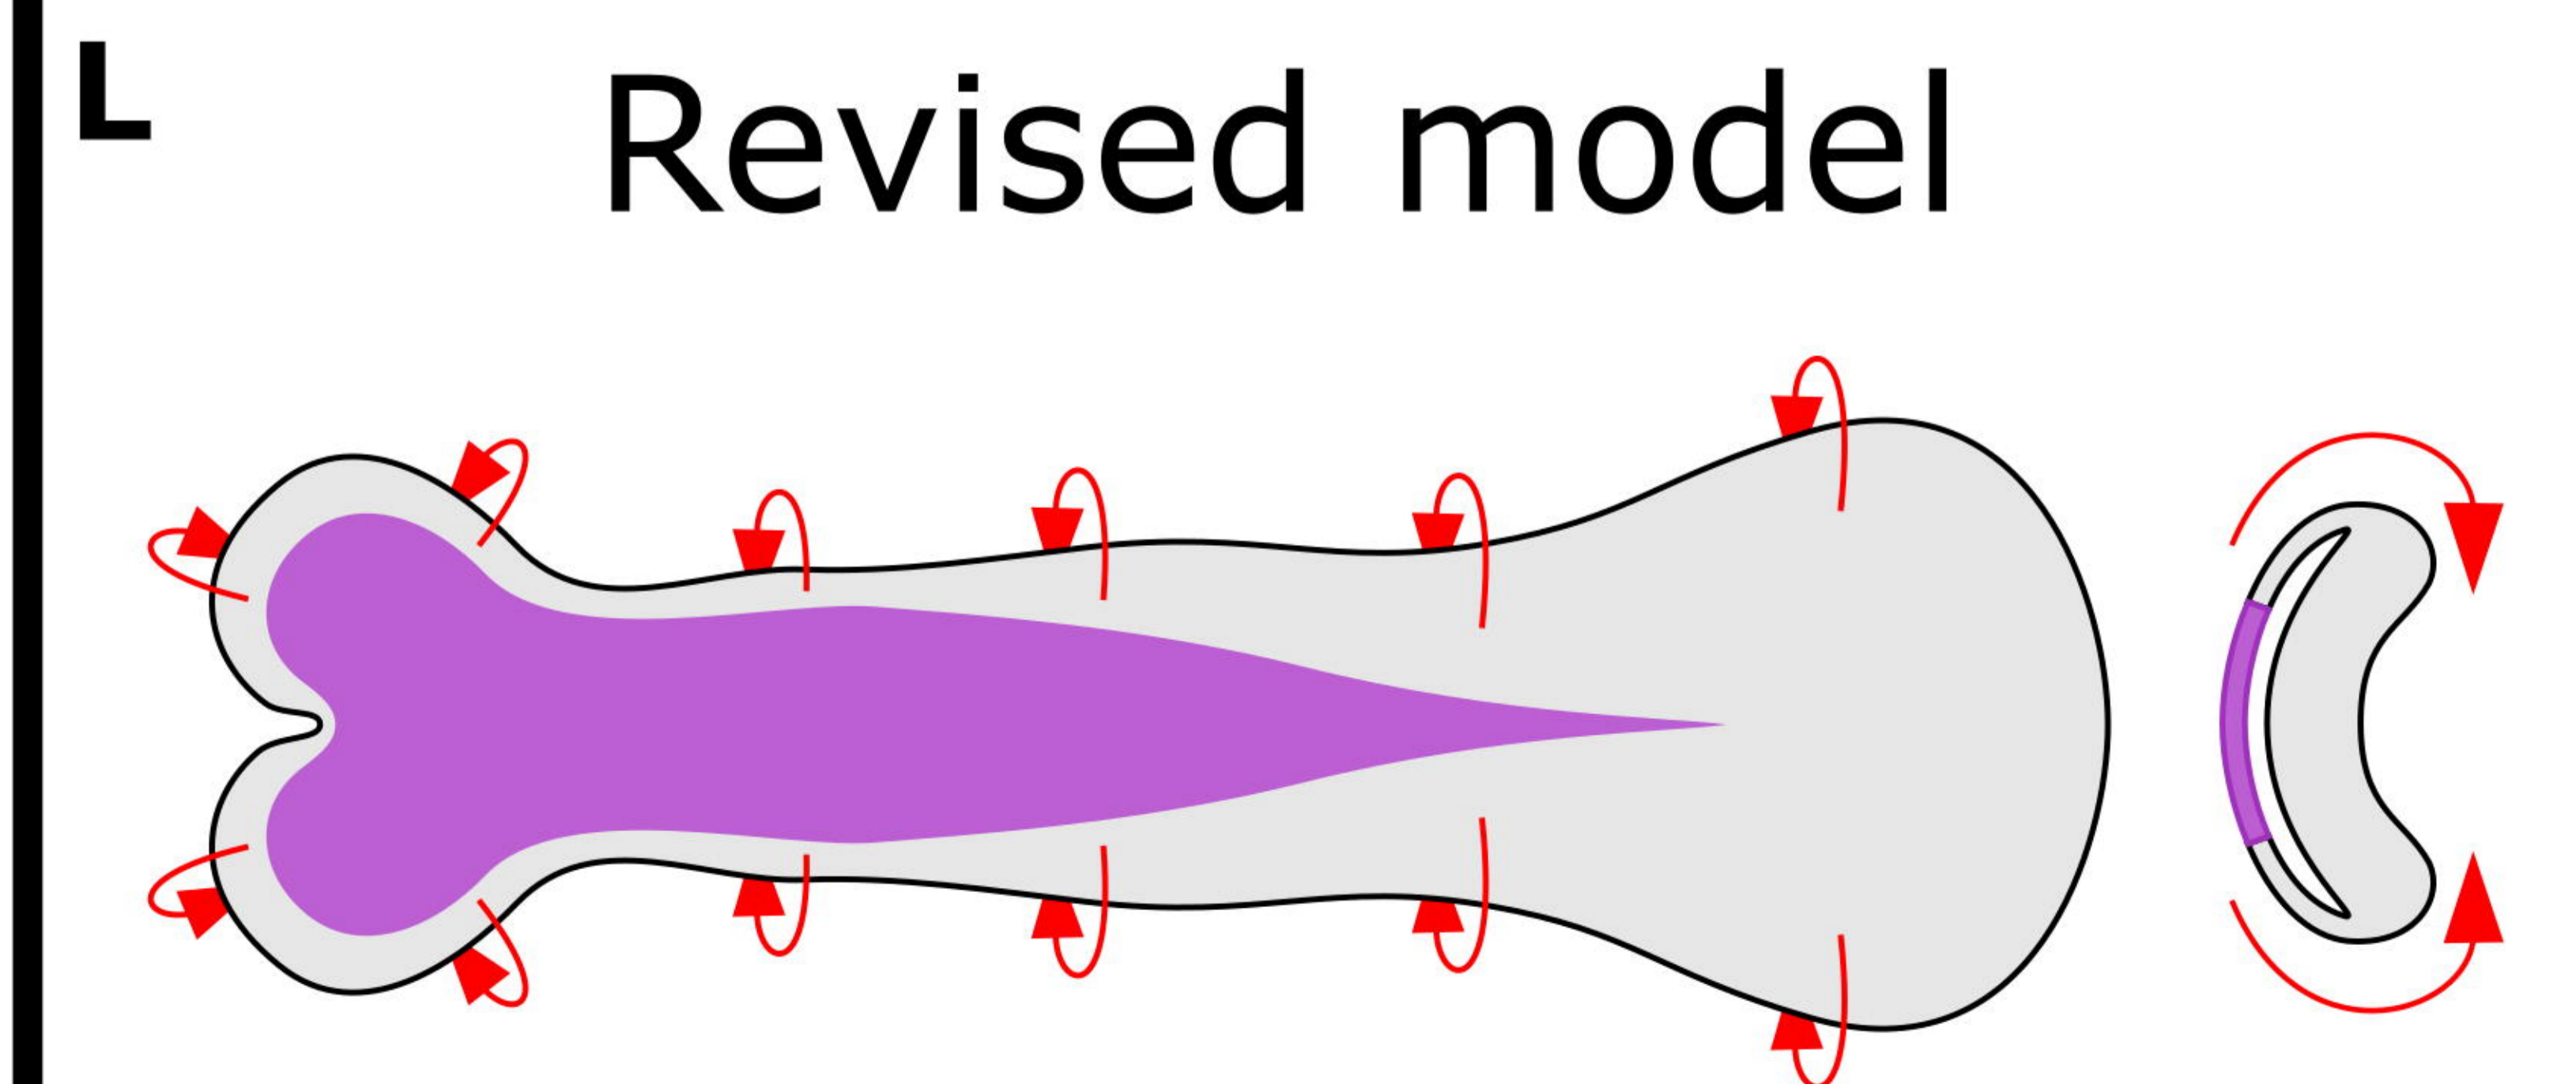

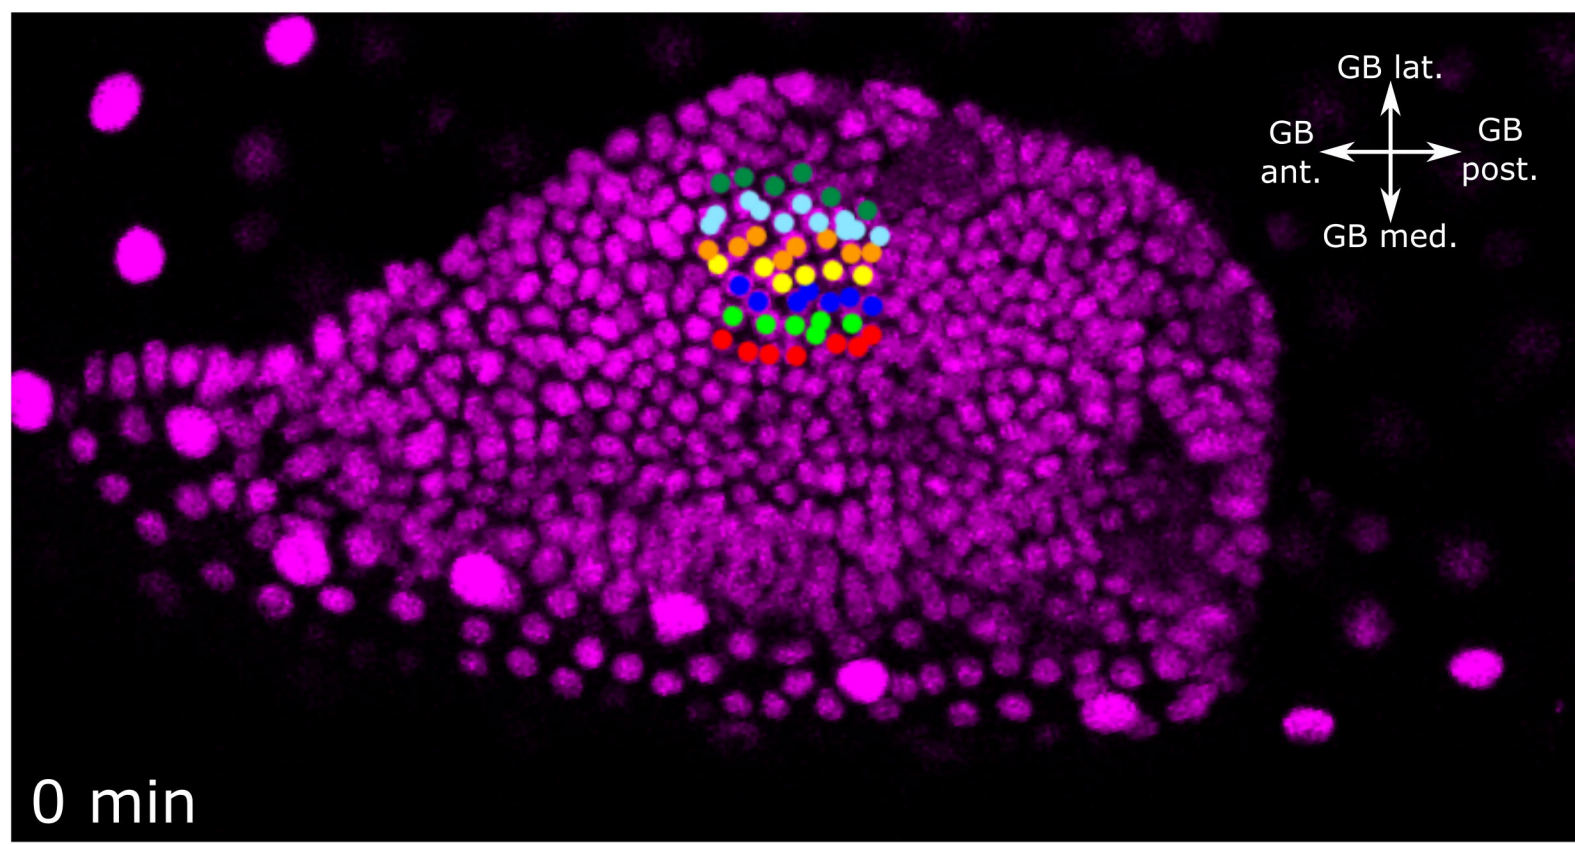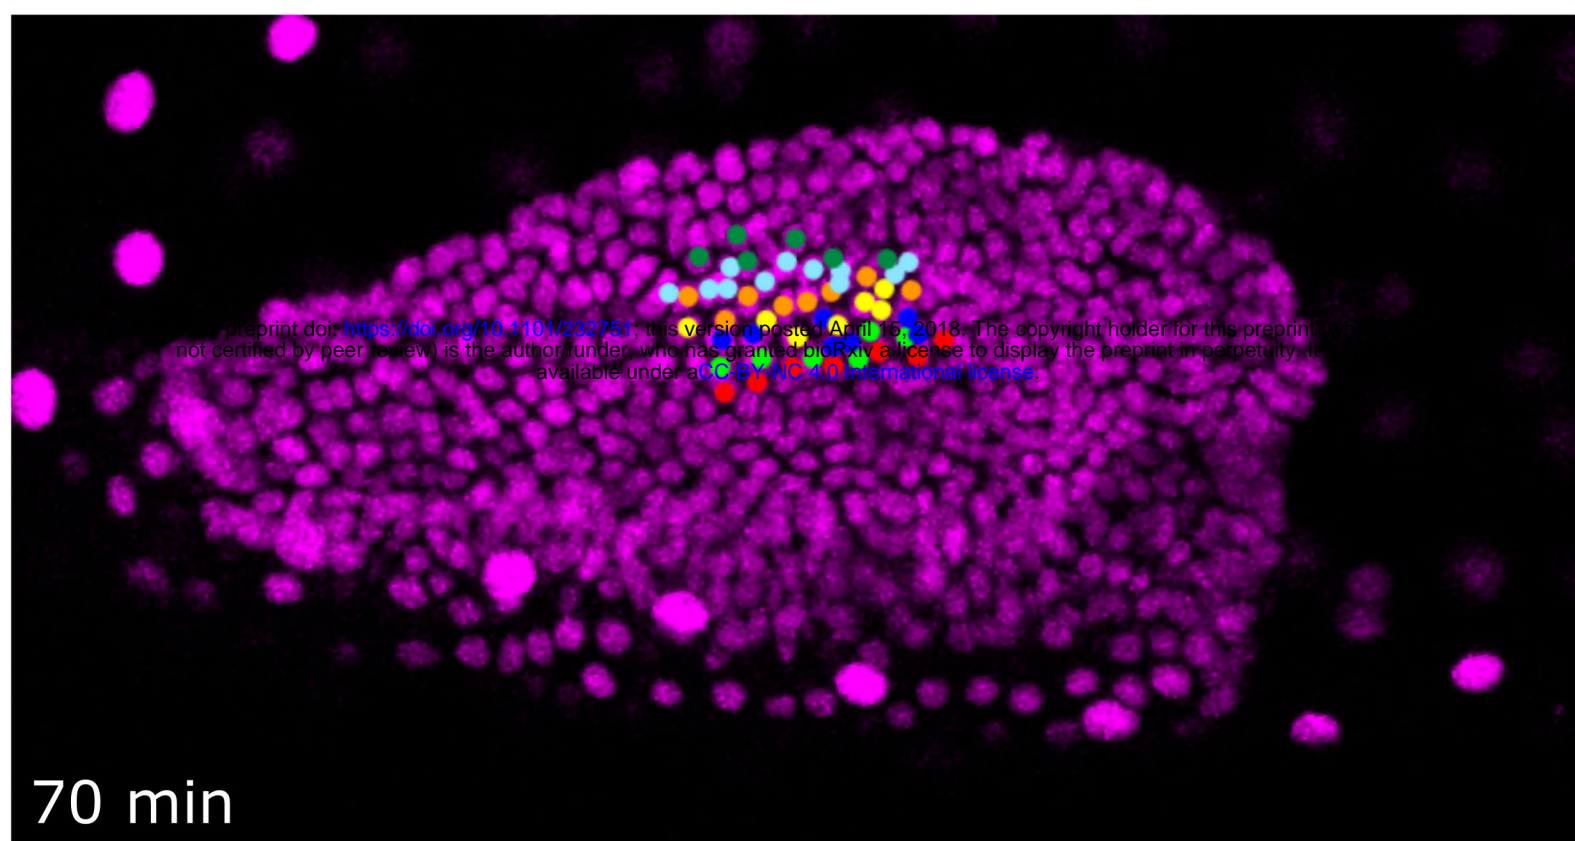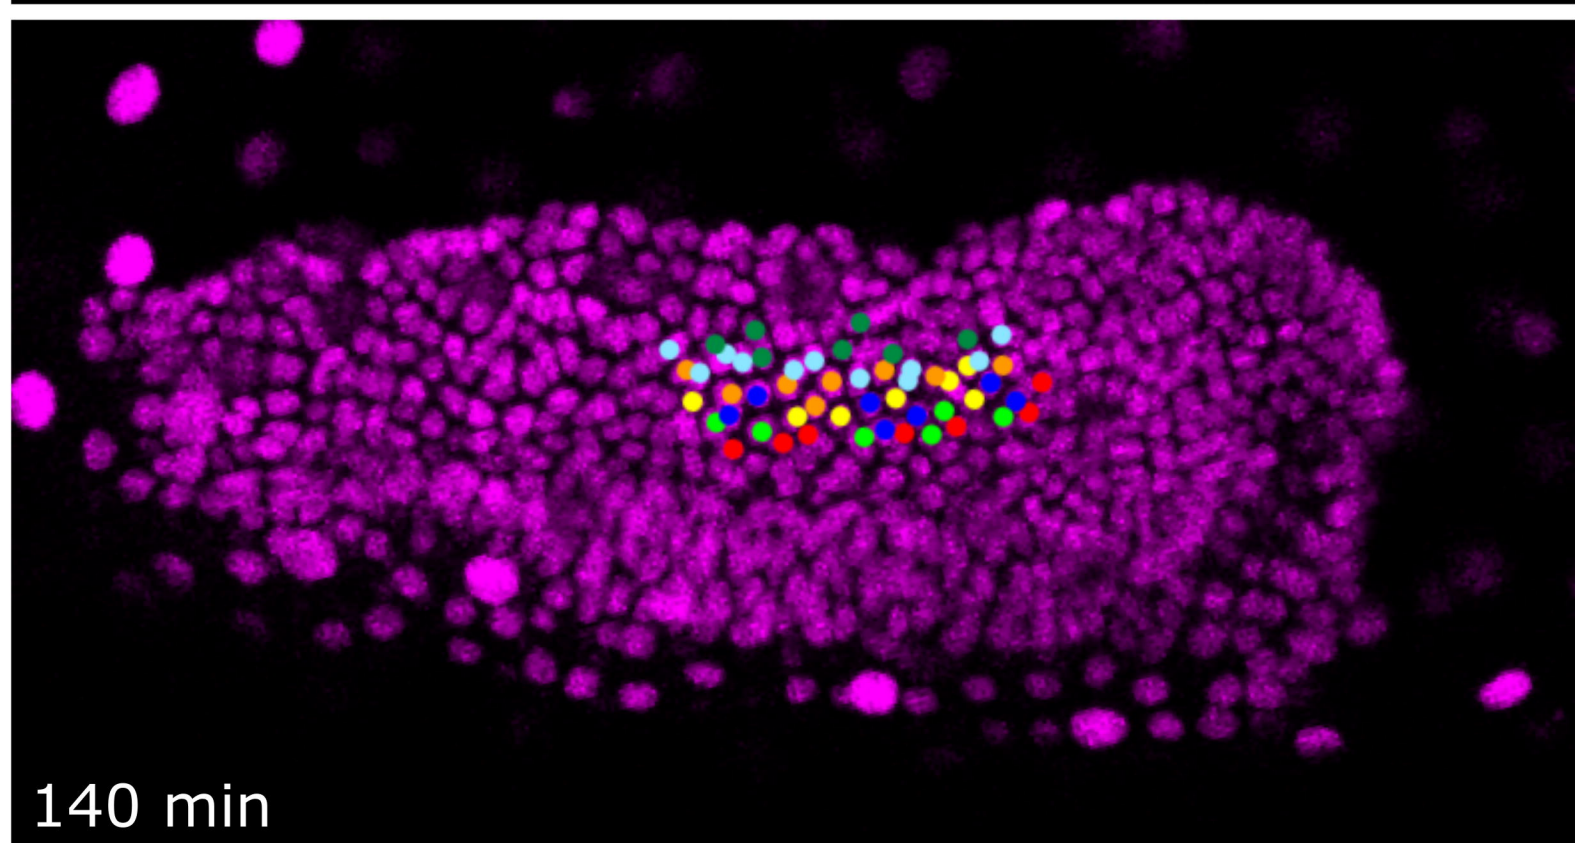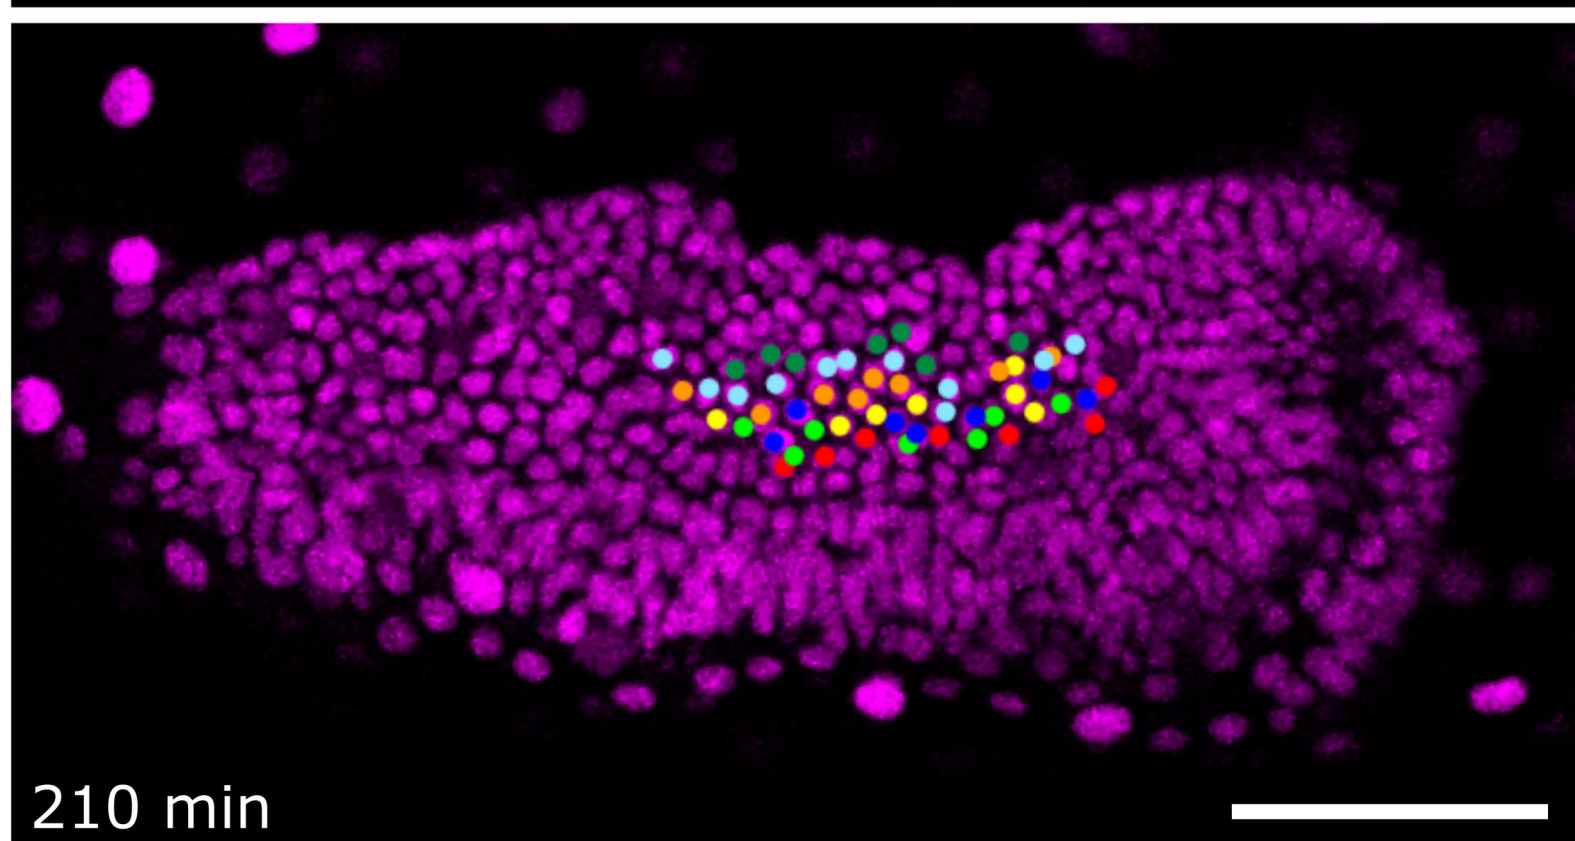



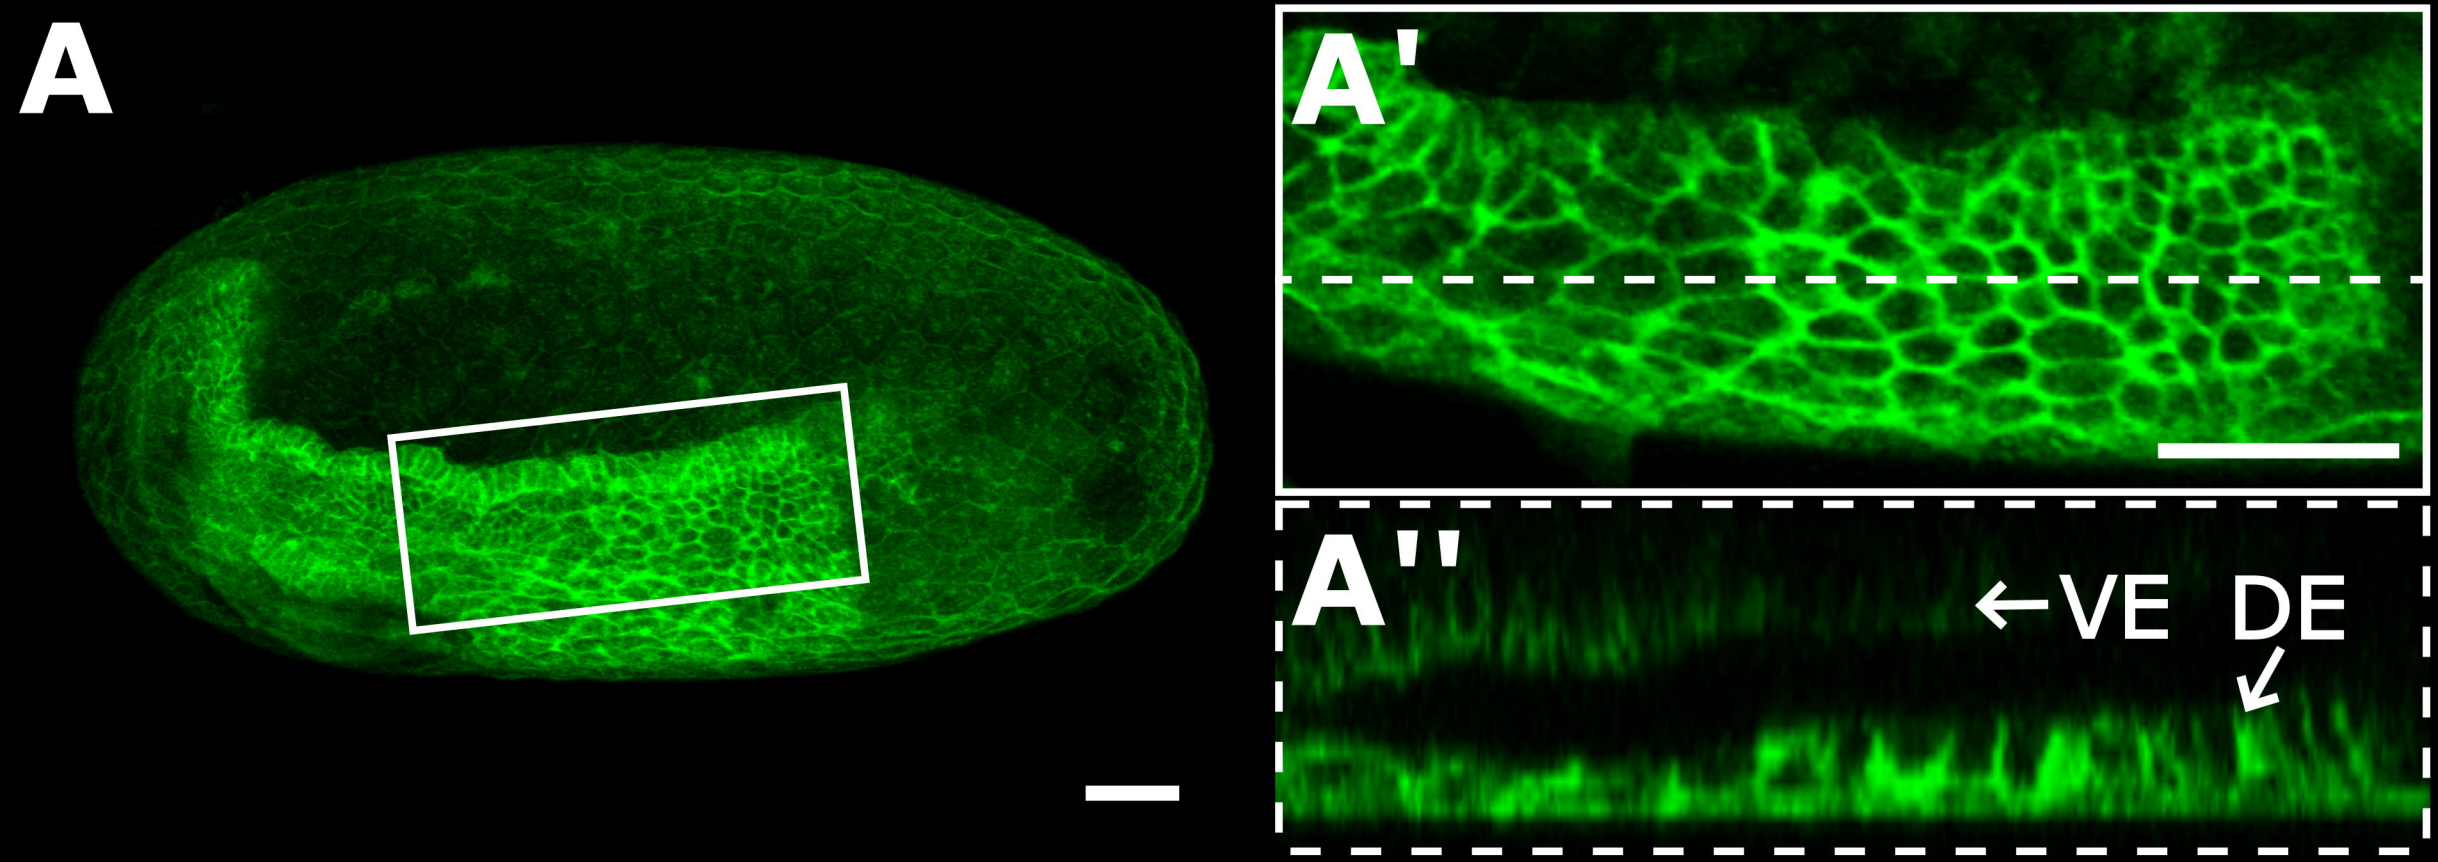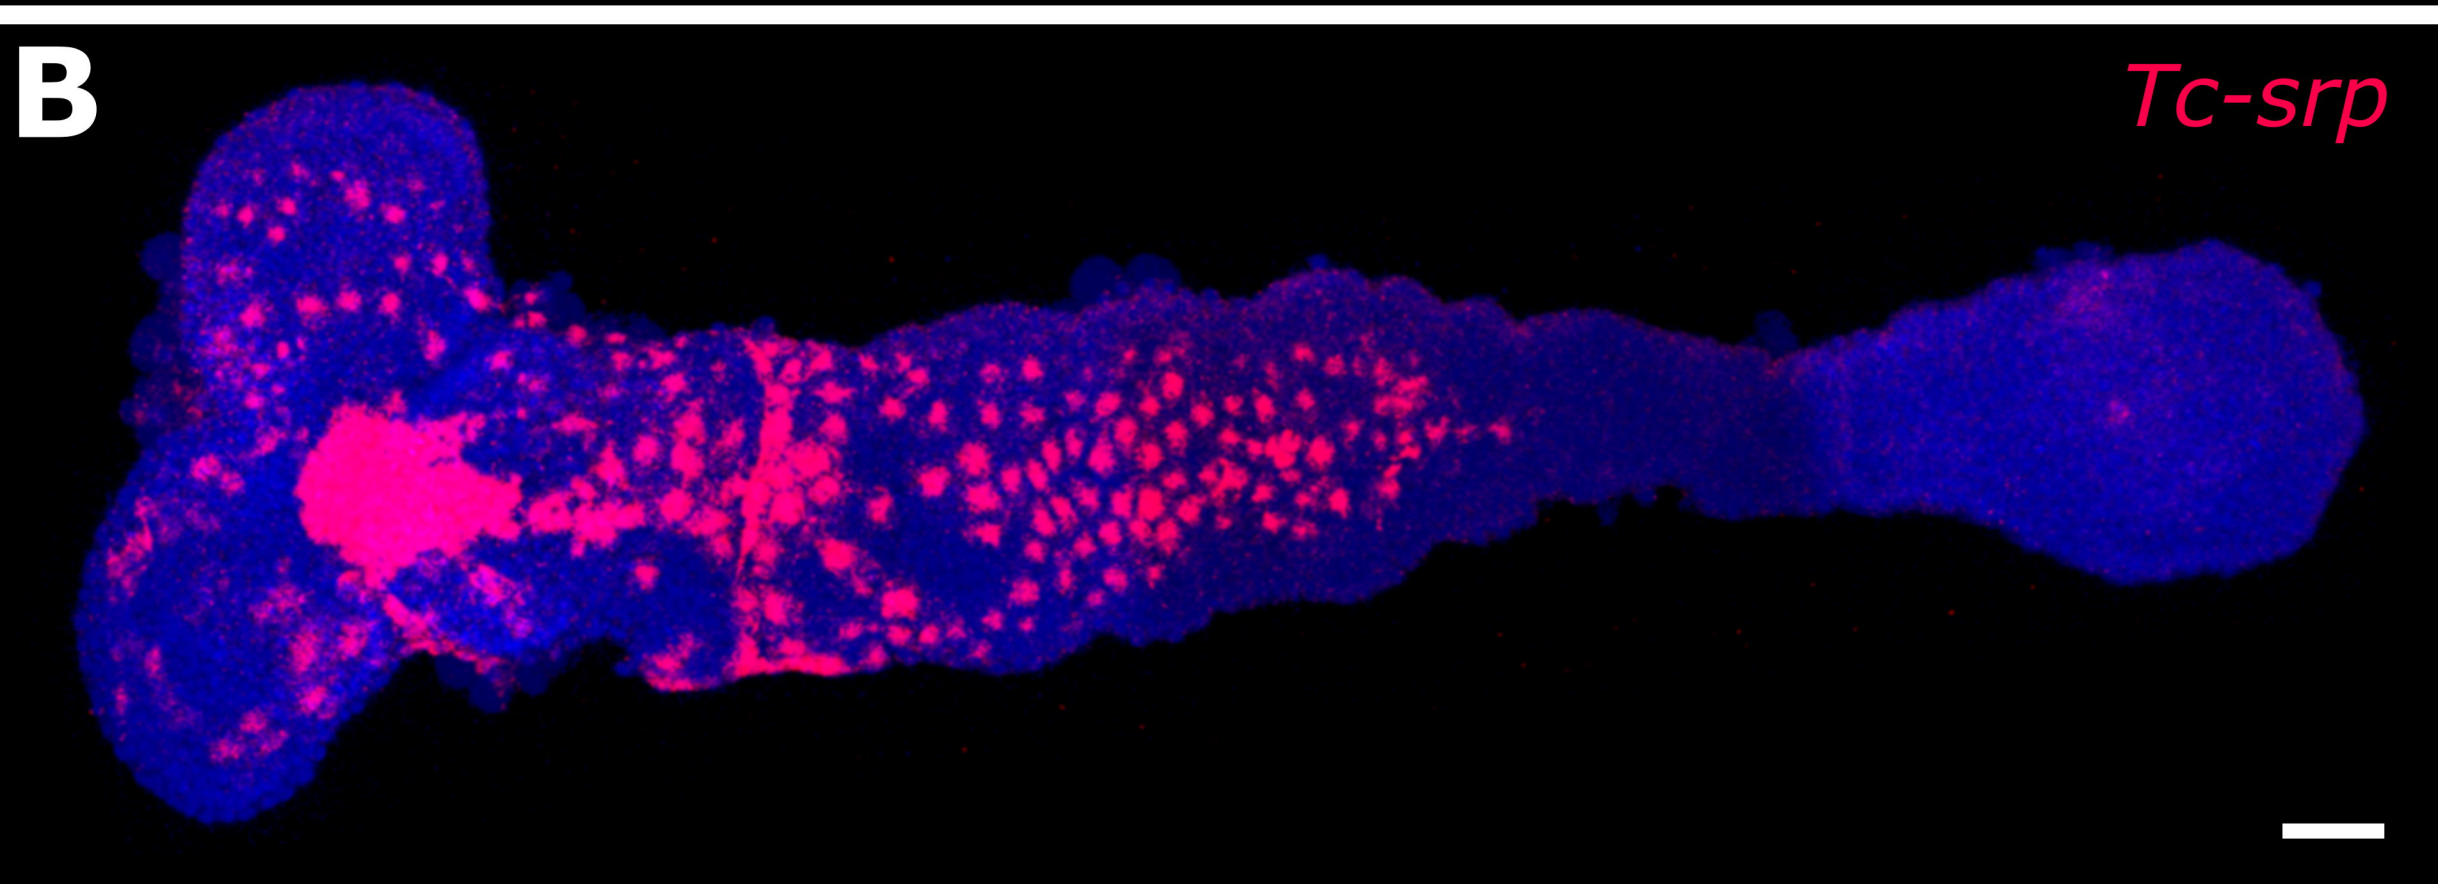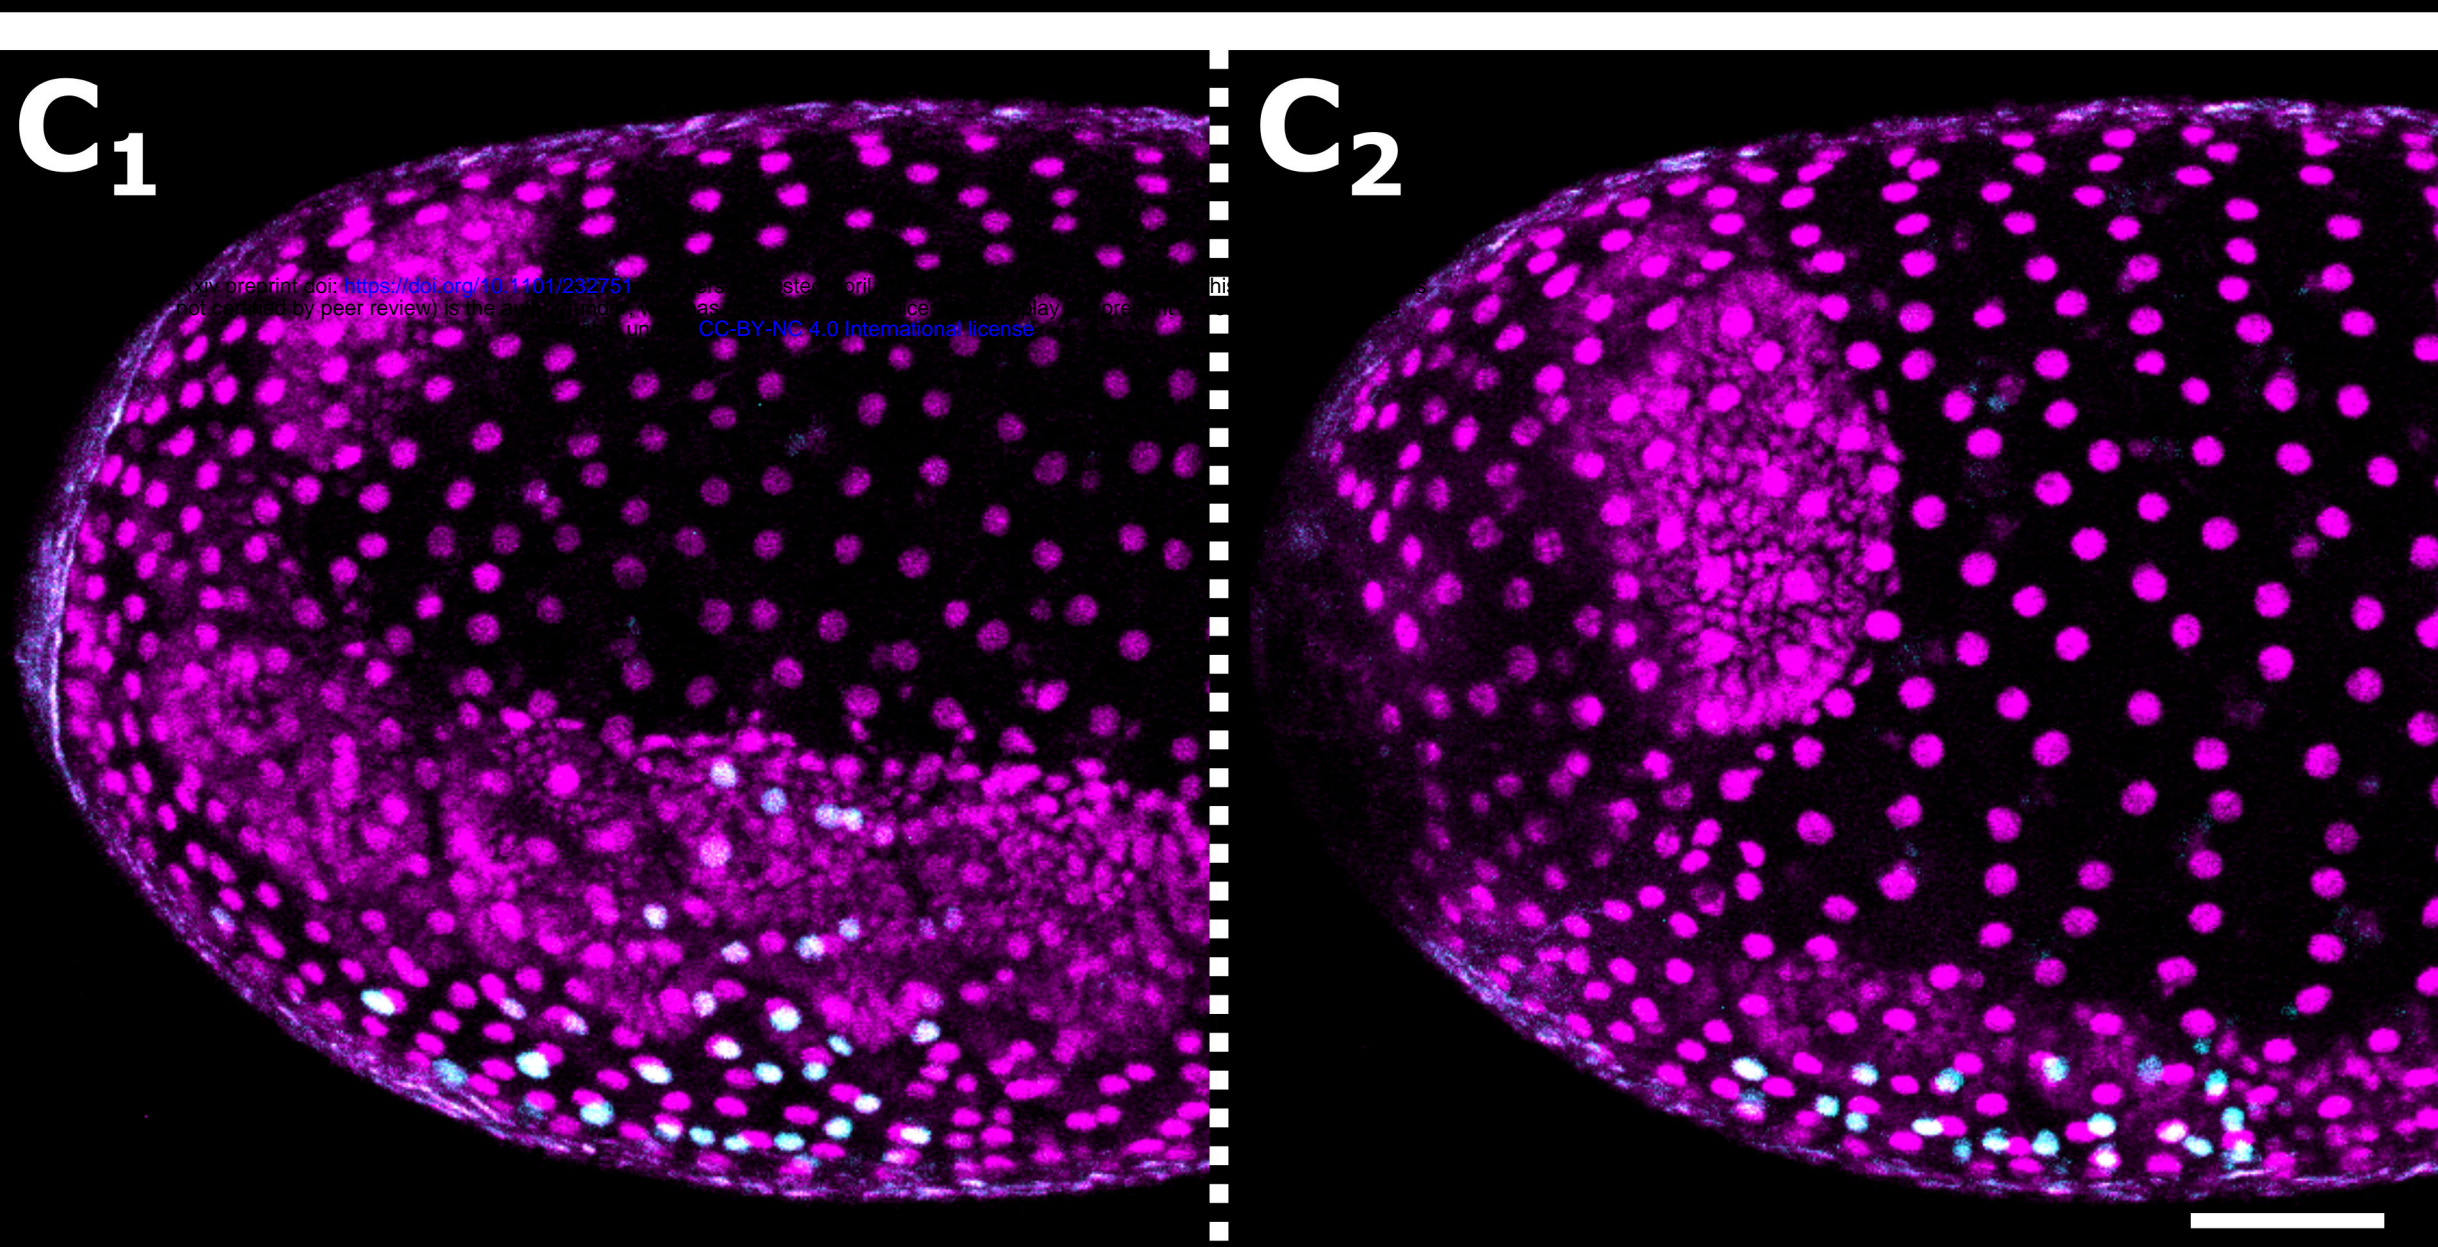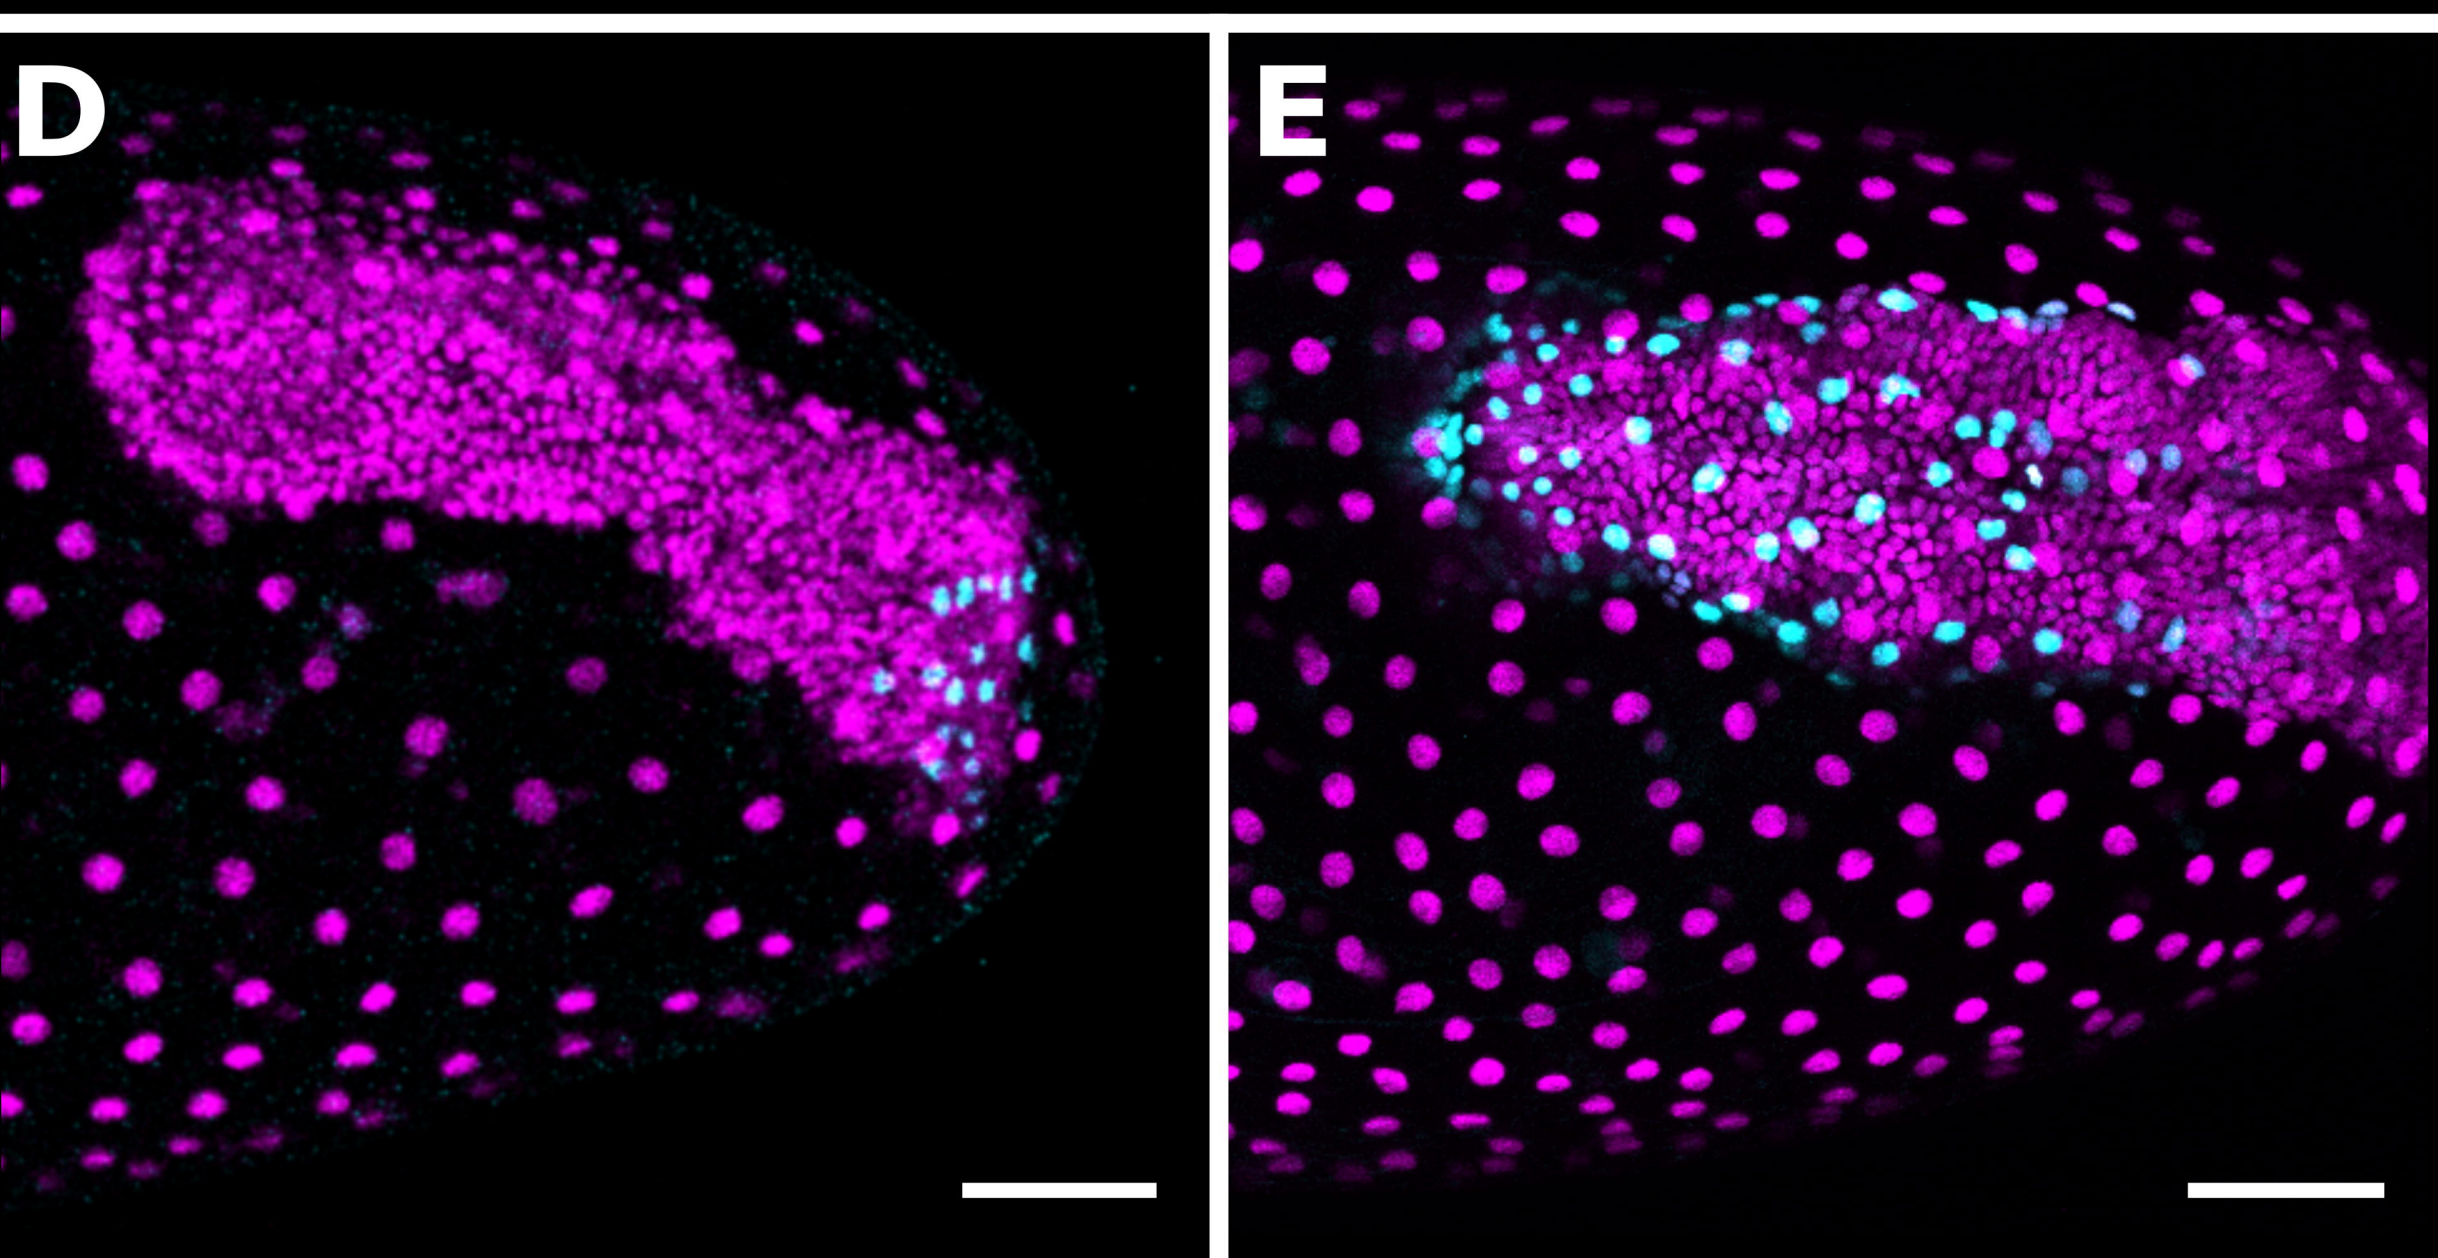

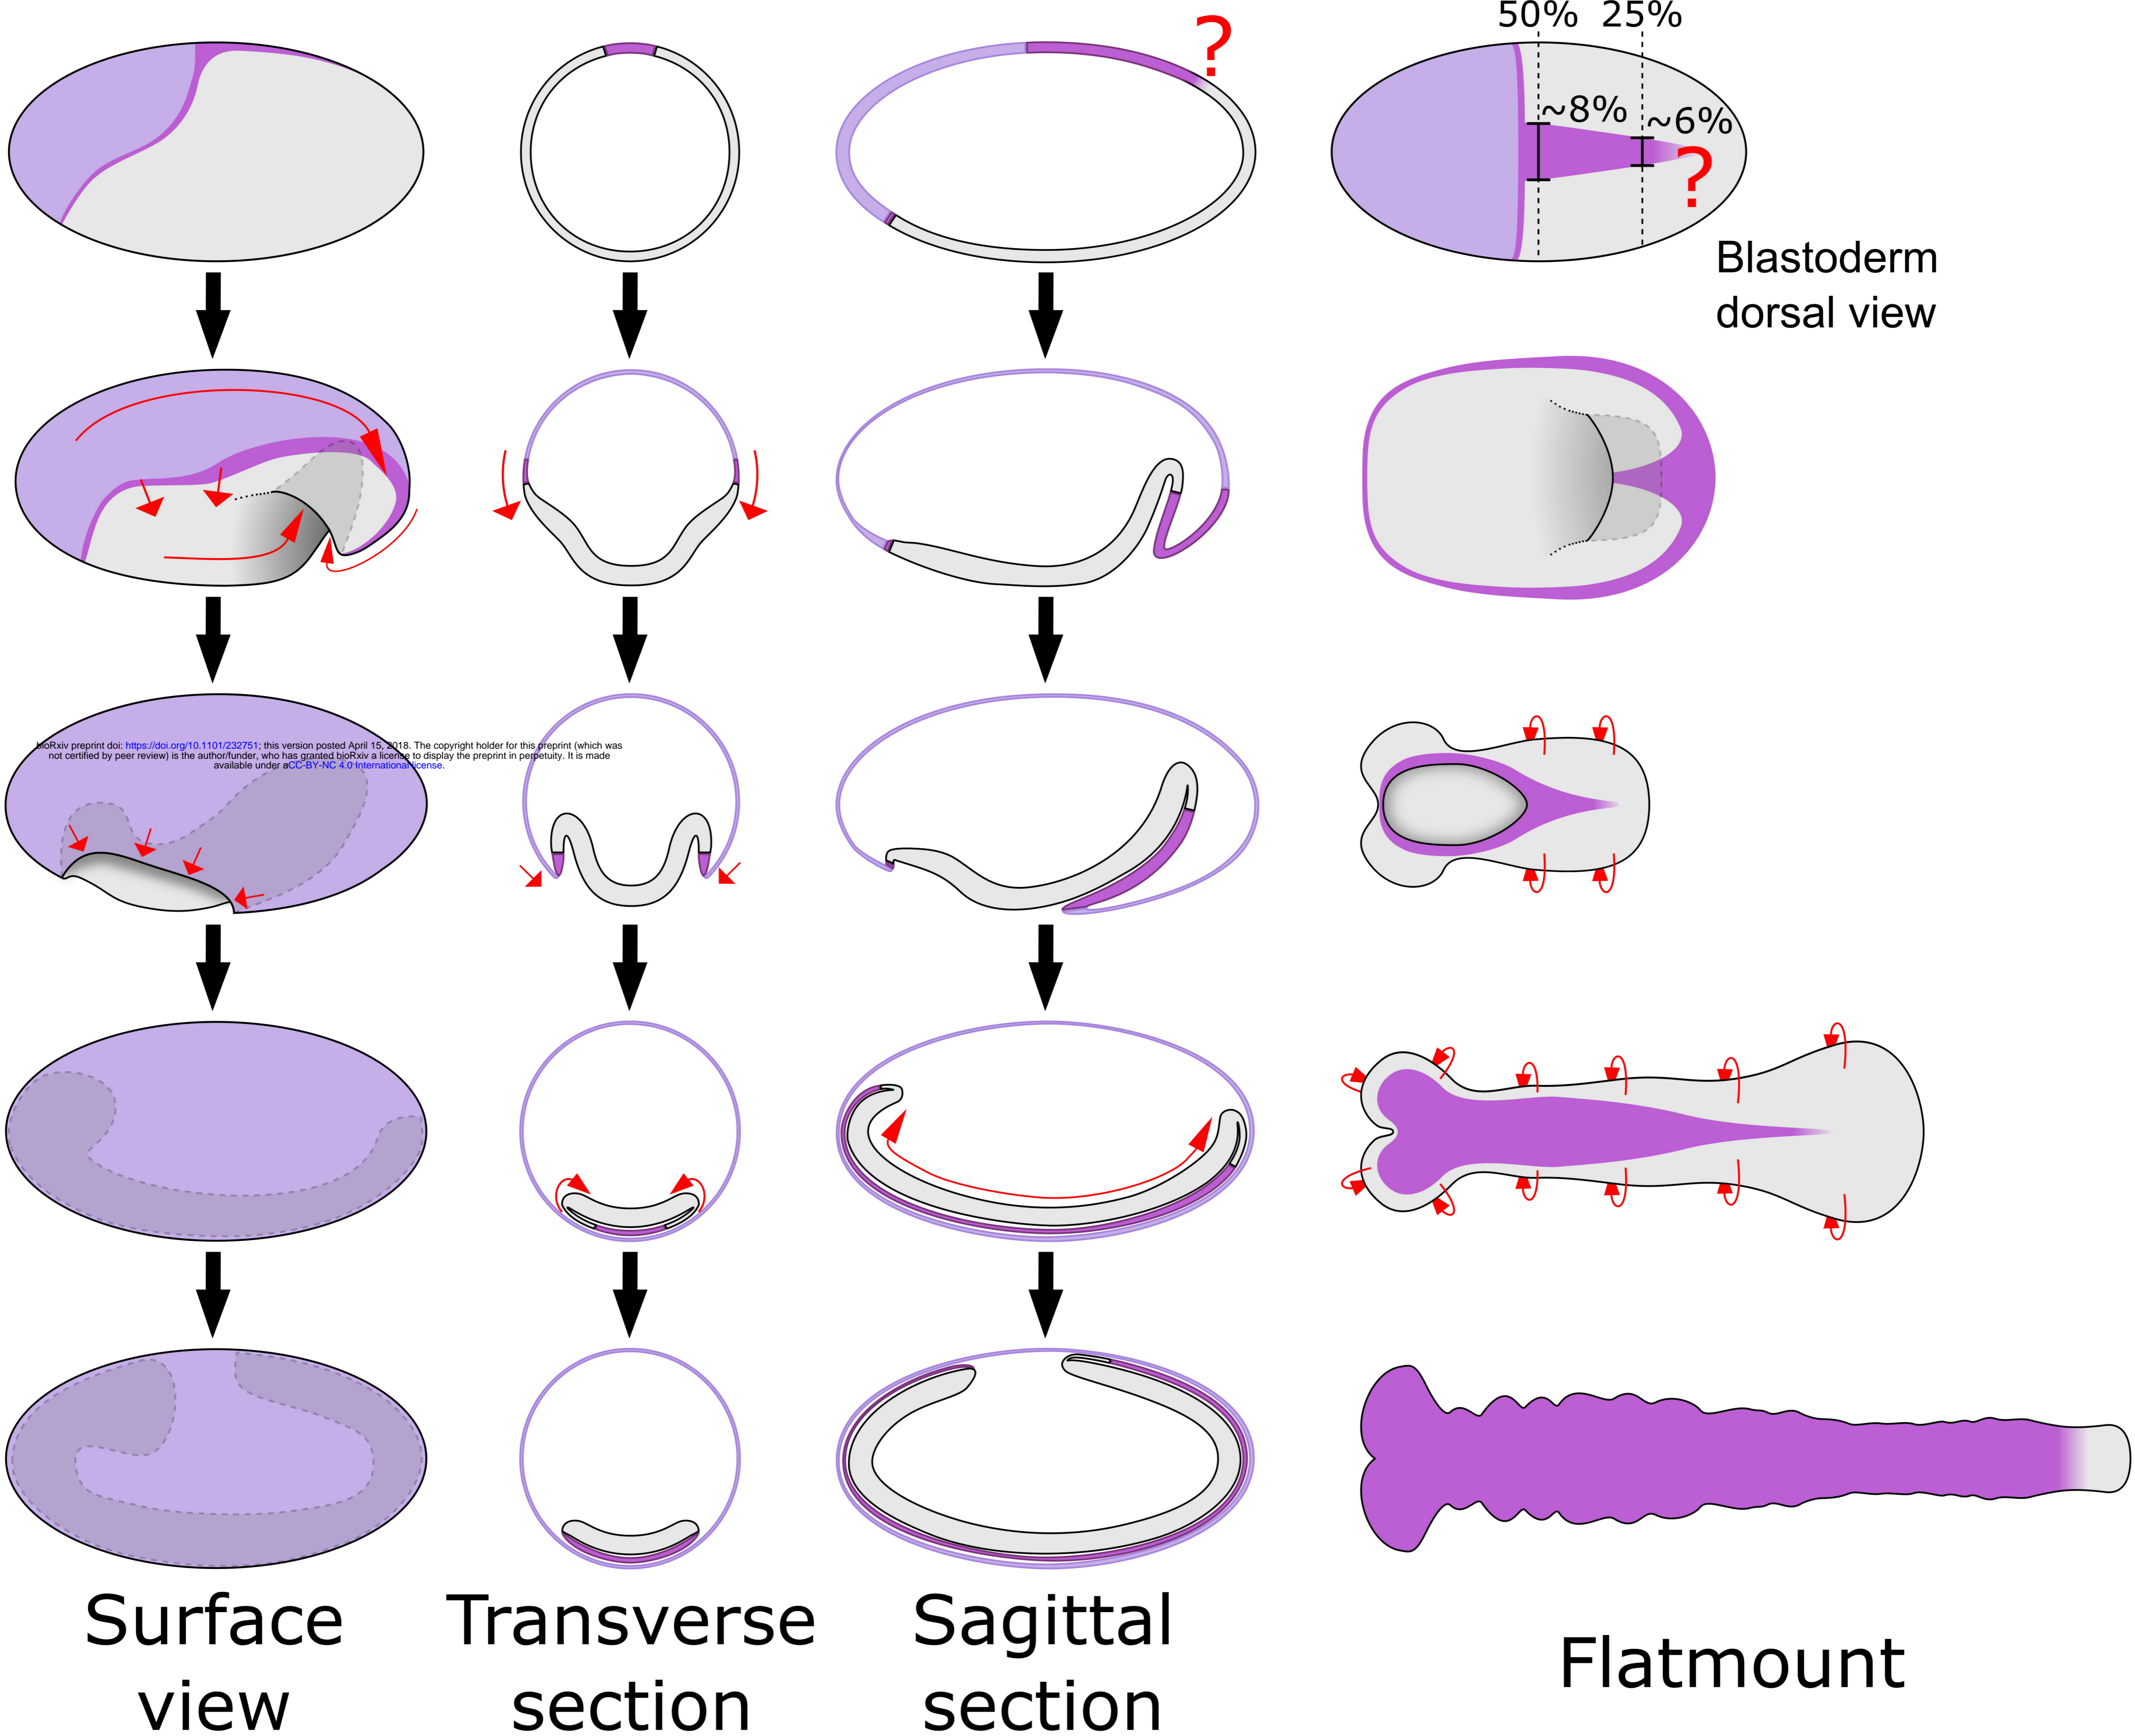

# *Tribolium*

**A<sub>1</sub>**

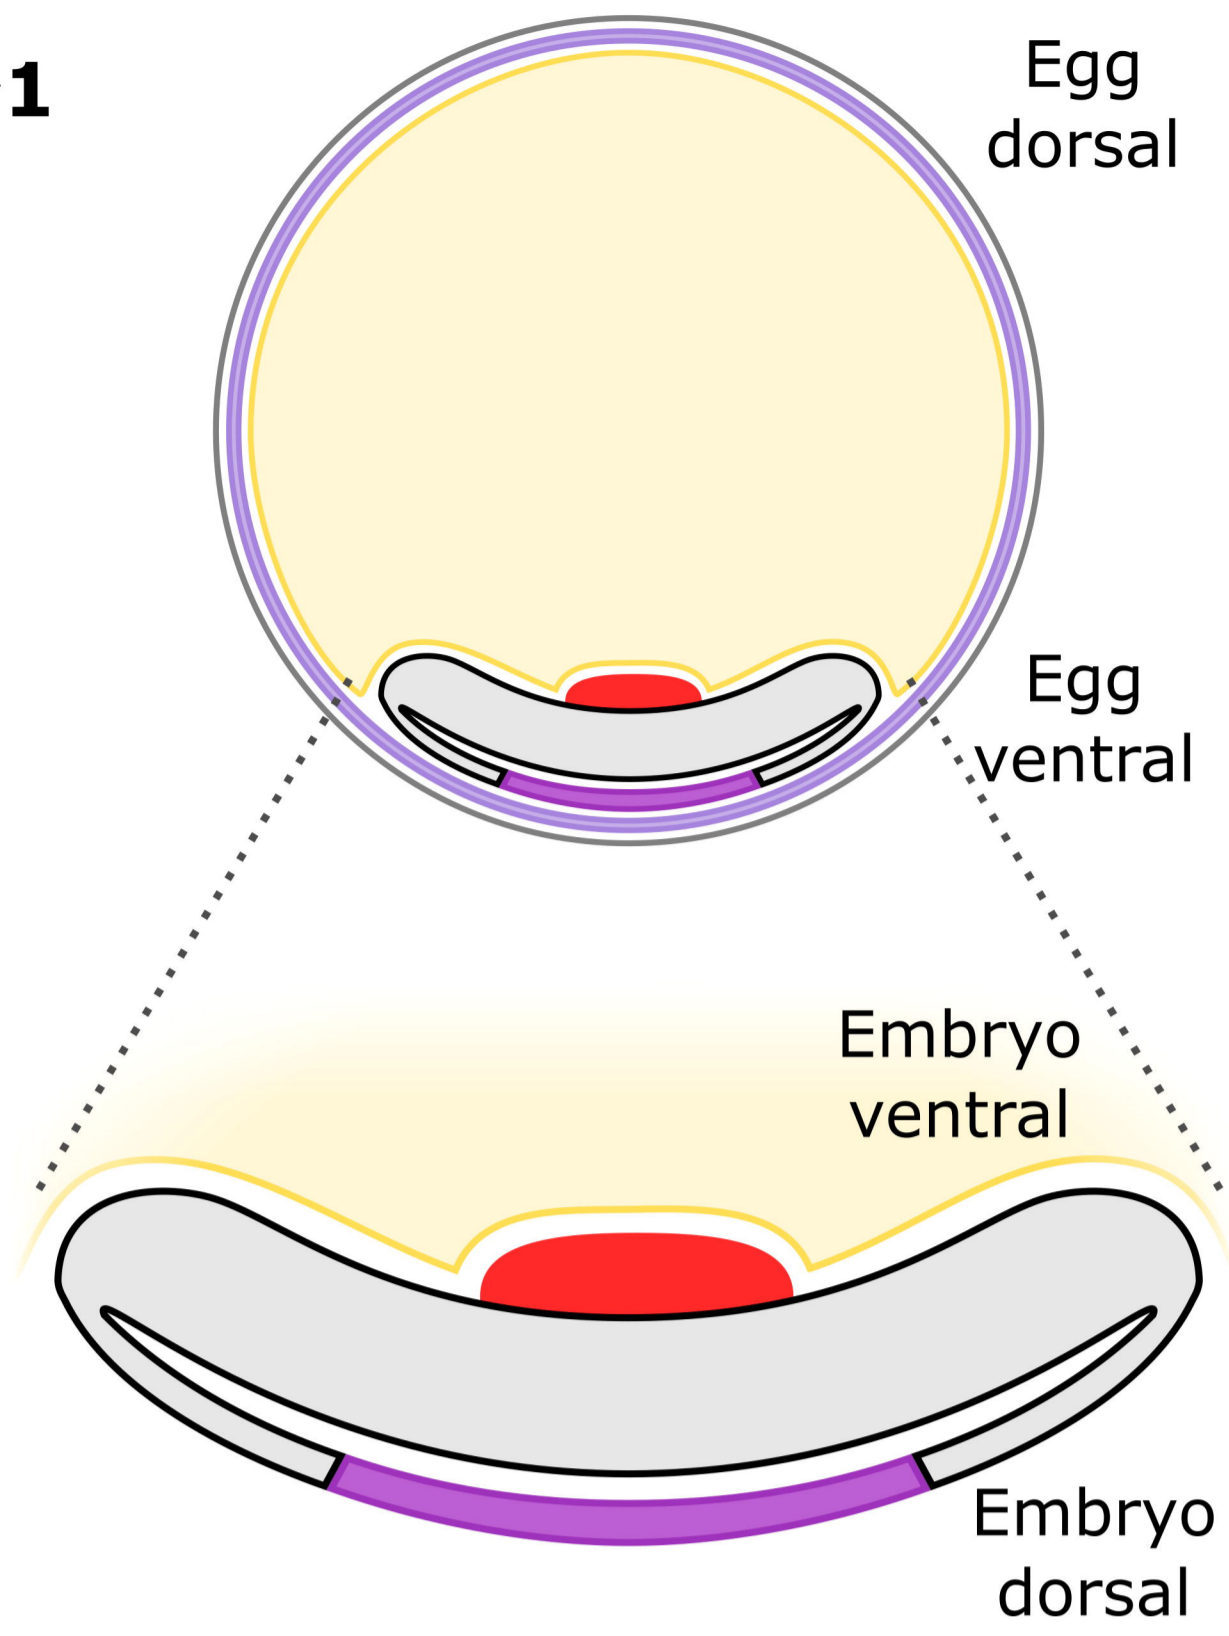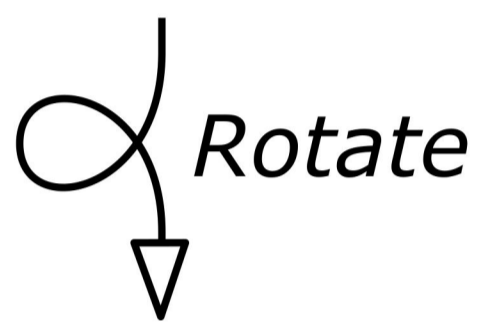

**A<sub>2</sub>**

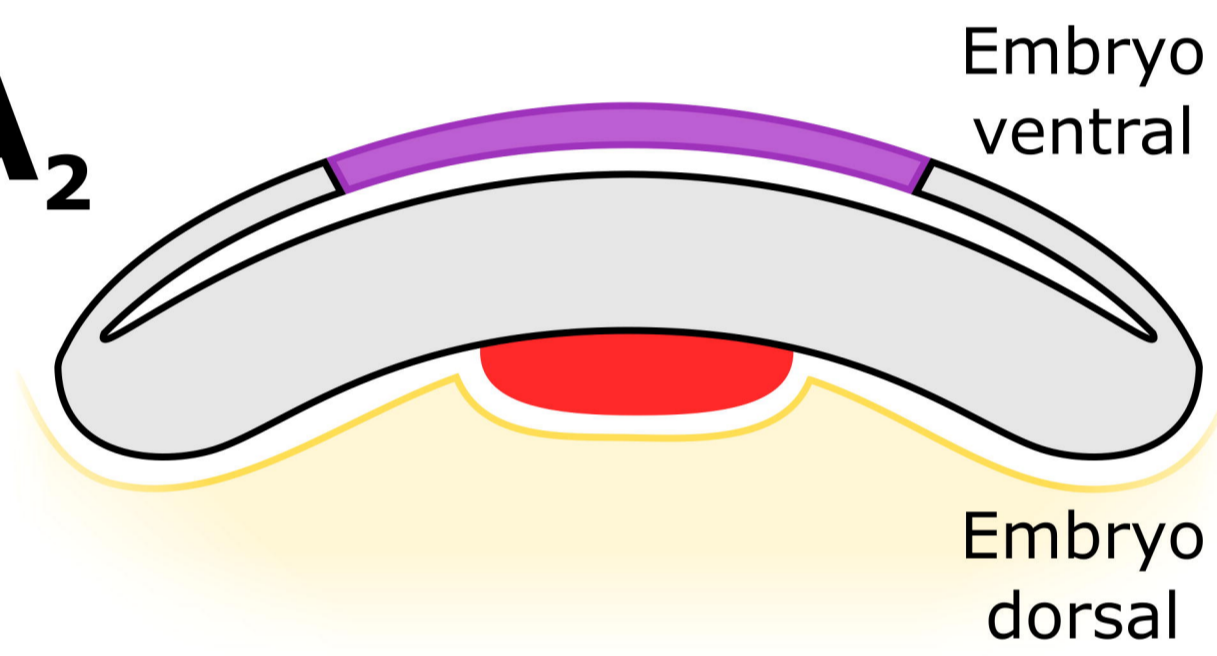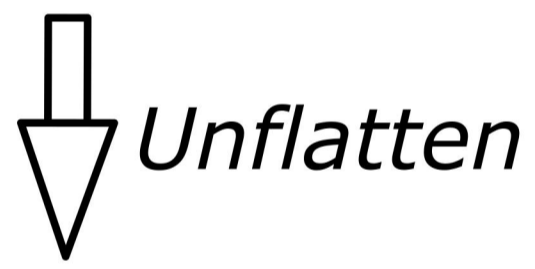

**A<sub>3</sub>**

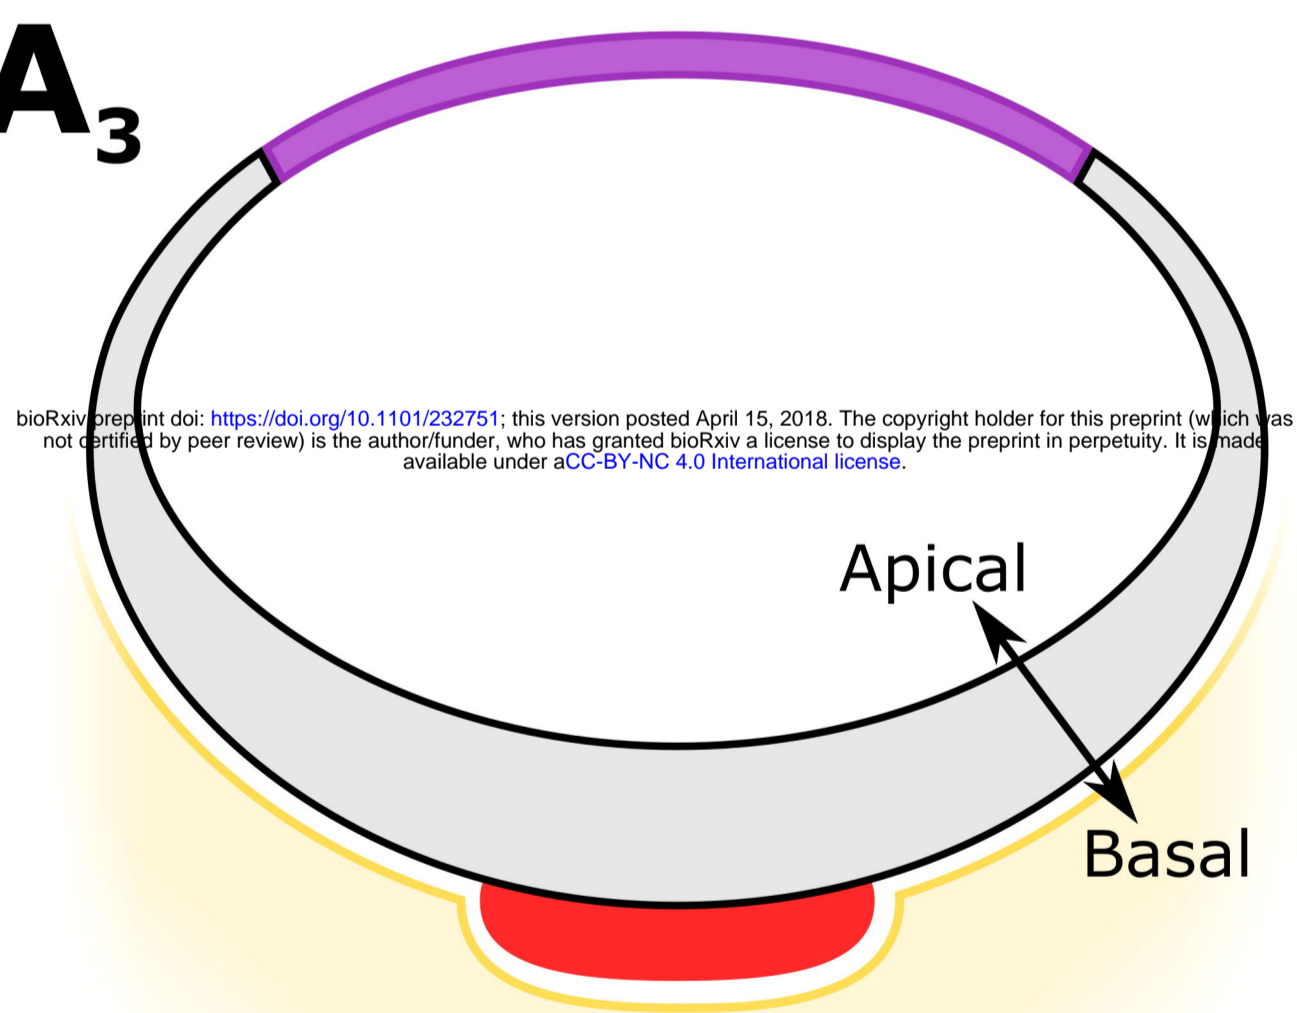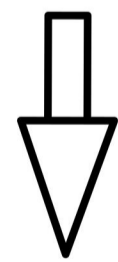

**A<sub>4</sub>**

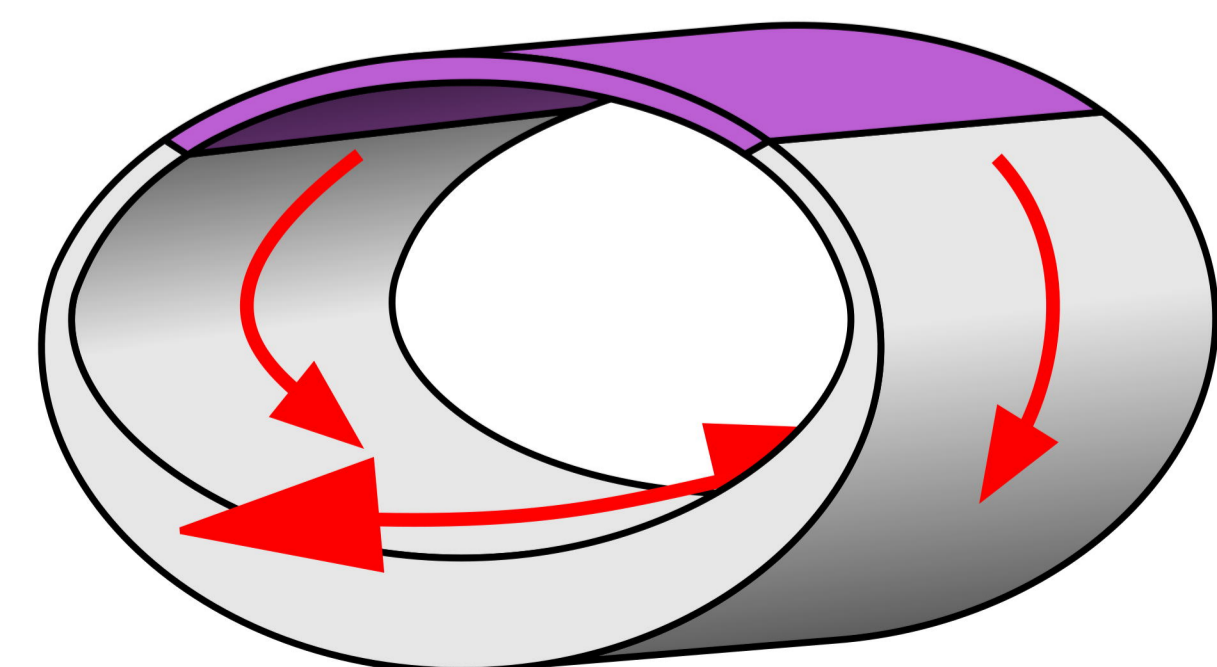

# *Drosophila*

**B<sub>1</sub>**

Egg AND embryo dorsal

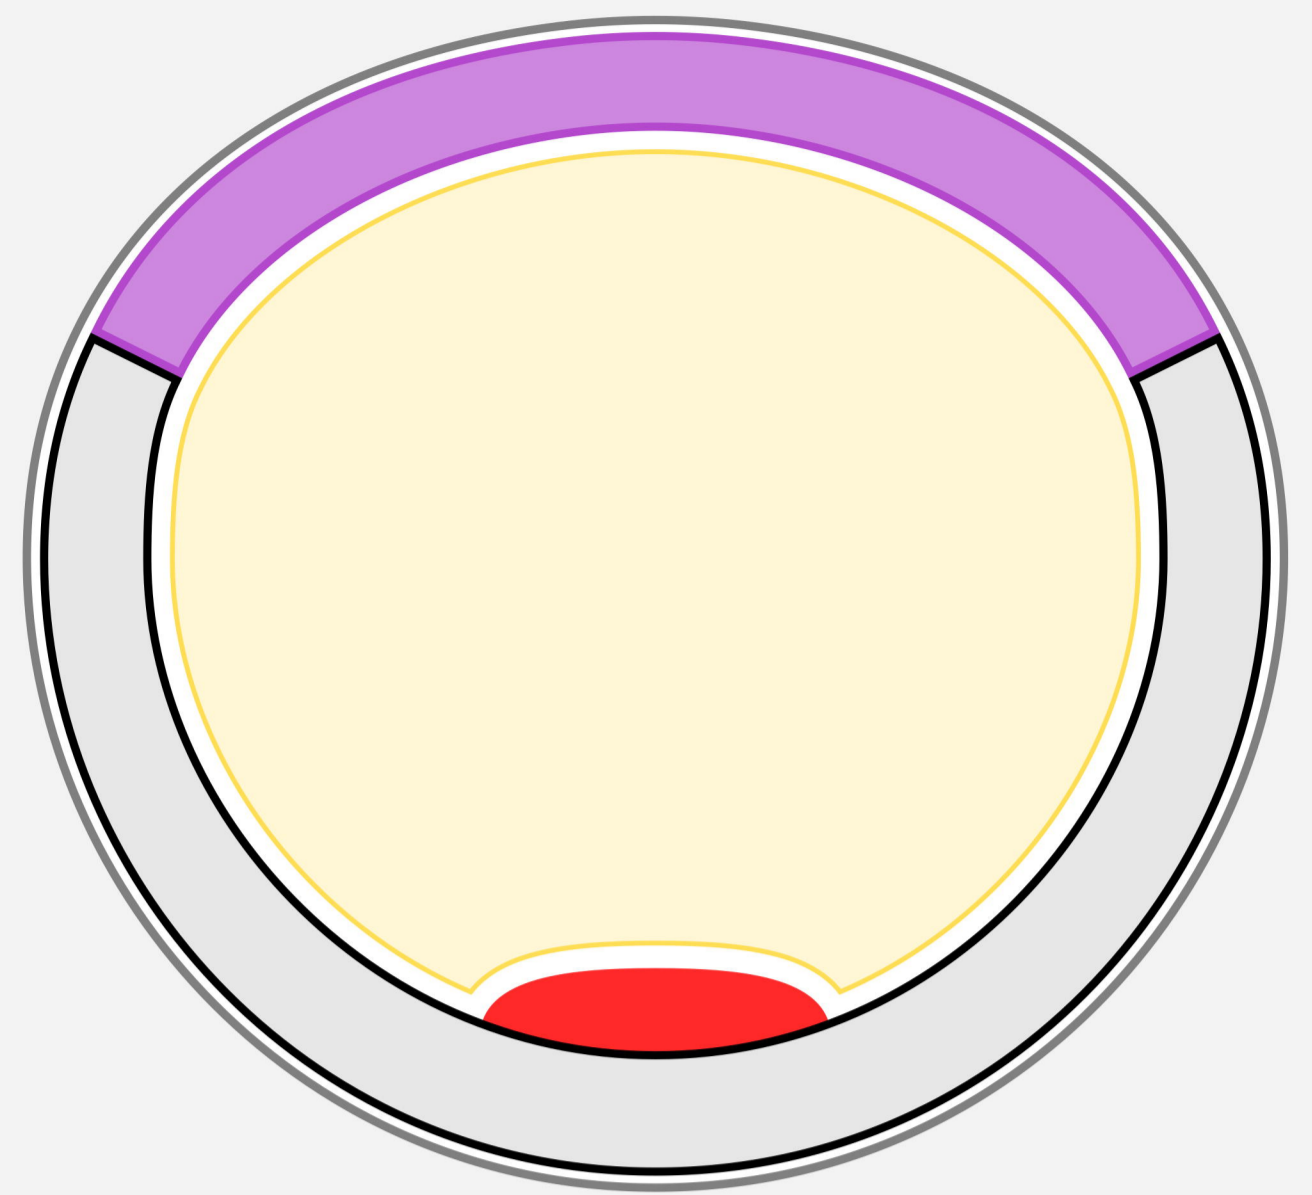

Egg AND embryo ventral

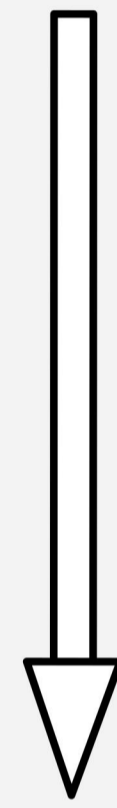

**B<sub>2</sub>**

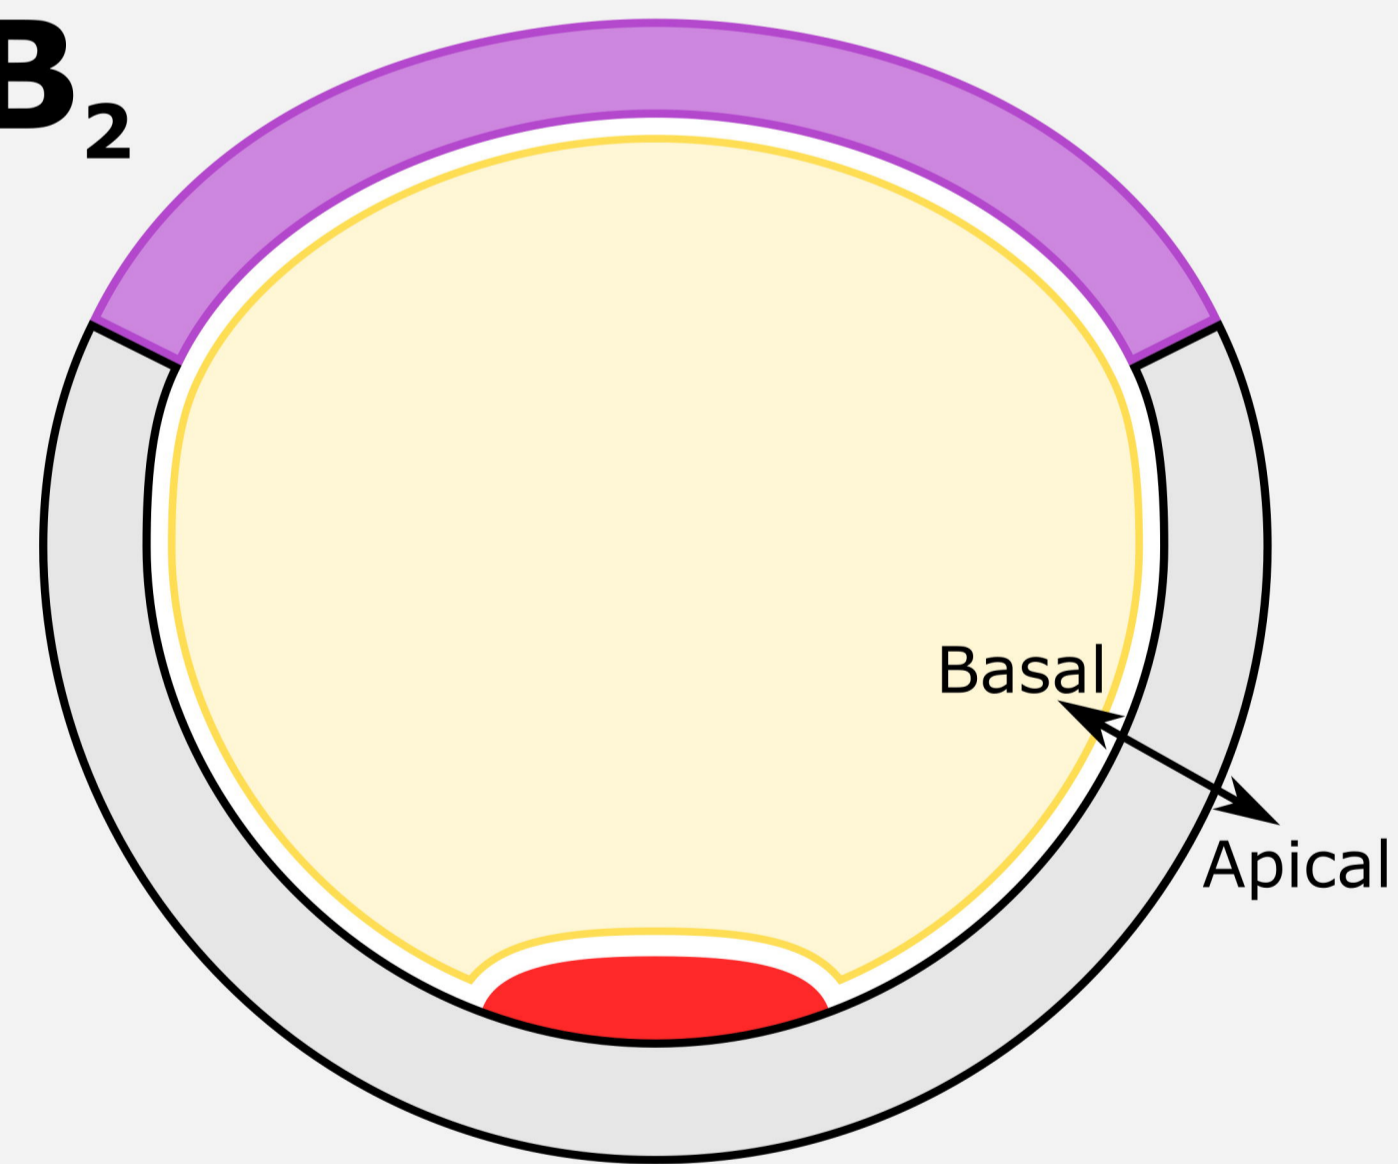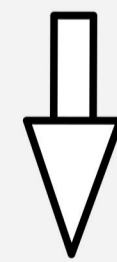

**B<sub>3</sub>**

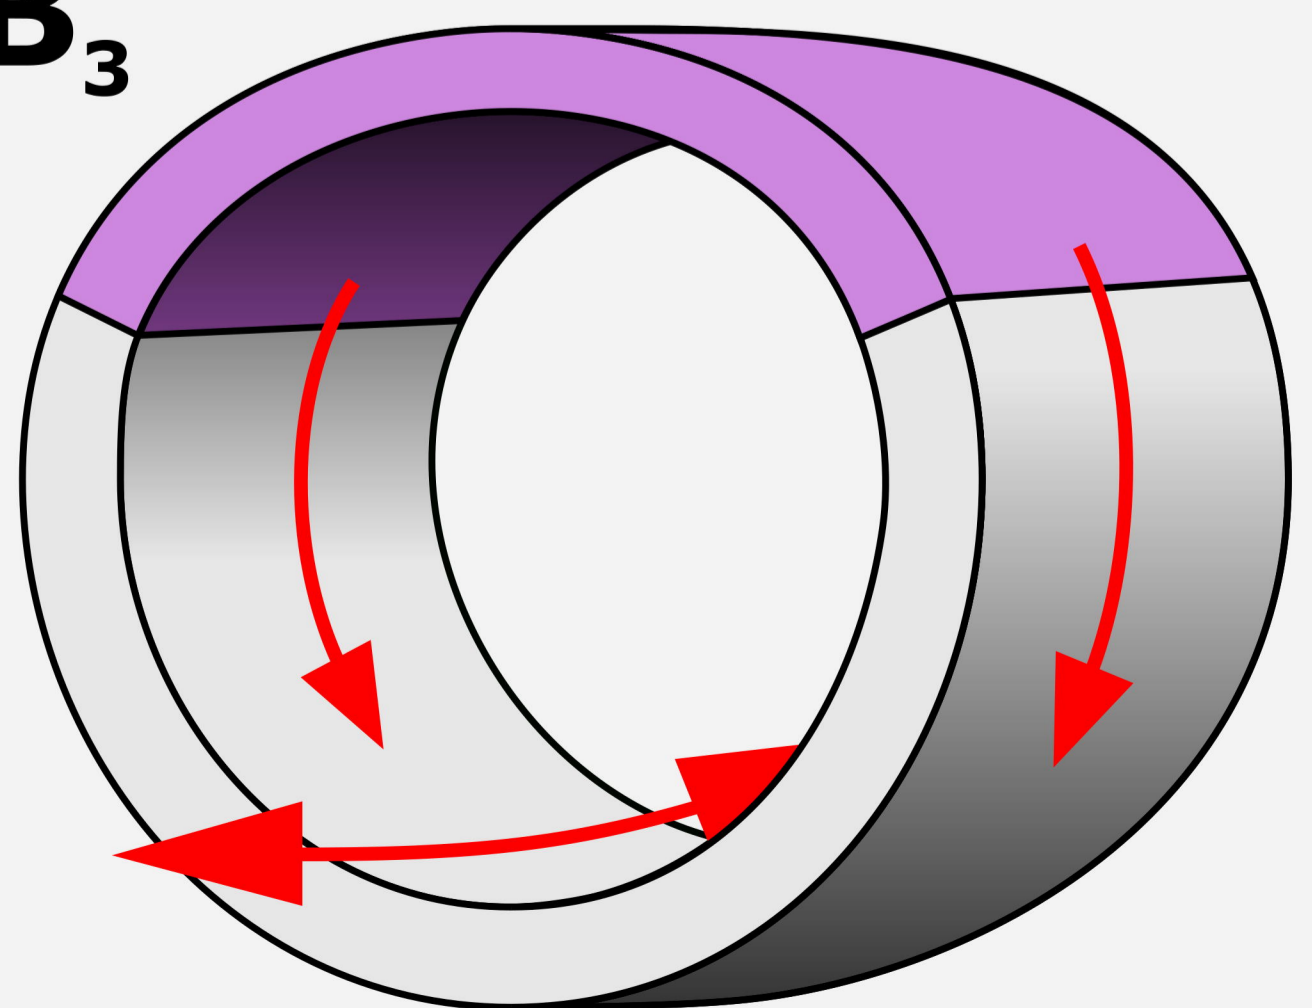

Source: https://www.biorxiv.org/content/10.1101/232751v2.full.pdf
